# Supplementary material for: Visible-light-promoted C(sp3)–H thiolation of aliphatic ethers with thiosulfonates
Source: Royal Society of Chemistry journal article supplement (doi:10.1039/d3nj01029e), 2023-01-01
Supplement: d3nj01029e1.pdf [file d3nj01029e1.pdf]

## Supplementary Information

### Visible-light-promoted C(sp<sup>3</sup>)-H thiolation of aliphatic ethers with thiosulfonates

Wen-Zhu Bi,<sup>\*a,b</sup> Qing-Pu Liu,<sup>a</sup> Chen-Yu Li,<sup>a</sup> Wen-Jie Zhang,<sup>a</sup> Su-Xiang Feng,<sup>\*b,c,d</sup> Yang Geng,<sup>\*e</sup> Xiao-Lan Chen<sup>f</sup> and Ling-Bo Qu<sup>f</sup>

<sup>a</sup> School of Pharmacy, Henan University of Chinese Medicine, Zhengzhou, 450046, China.

<sup>b</sup> Henan Engineering Research Center of Modern Chinese Medicine Research, Development and Application, Zhengzhou, 450046, China.

<sup>c</sup> Academy of Chinese Medical Sciences, Henan University of Chinese Medicine, Zhengzhou, 450046, China. E-mail: fengsx221@163.com

<sup>d</sup> Collaborative Innovation Center for Chinese Medicine and Respiratory Diseases co-constructed by Henan province & Education Ministry of P. R. China, Zhengzhou, 450046, China

<sup>e</sup> Department of Pharmacy, Zhengzhou Railway Vocational and Technical College, Zhengzhou, 450046, China. E-mail: gengyang0001@163.com

<sup>f</sup> College of Chemistry, Zhengzhou University, Zhengzhou, 450052, China.

Corresponding E-mail: [biwenzhu2018@hactcm.edu.cn](mailto:biwenzhu2018@hactcm.edu.cn)

### Table of Contents

|                                                                                                |     |
|------------------------------------------------------------------------------------------------|-----|
| 1. General information of reagents and instruments.....                                        | S2  |
| 2. General synthetic procedure for thiosulfonates and selenosulfonates.....                    | S3  |
| 3. General synthetic procedure for products 3.....                                             | S4  |
| 4. Investigations of photocatalyst, oxidant and base on the model reaction.....                | S5  |
| 5. Mechanism Study.....                                                                        | S6  |
| 6. Characterization data of compounds 3a-aa and 4a-c.....                                      | S12 |
| 7. <sup>1</sup> H NMR, <sup>13</sup> C NMR and HRMS/MS copies of compounds 3a-aa and 4a-c..... | S18 |

## 1. General information of reagents and instruments

All reagents and solvents were purchased from commercial suppliers without further purification. All reactions were carried out in borosilicate glass vessels in a photo reactor manufactured by Beijing Roger Technology Co., Ltd. And, all reactions were performed under the irradiation of 5 W blue LED light without using filters (Figure S1, left). The blue light's energy peak wavelength is 452.6 nm, peak width at half-height is 21.6 nm and the irradiance@5W is 146.2 mW/cm<sup>2</sup> (Figure S1, right). LED irradiate through a high-reflection channel (path length is 2 cm) to the test tube. The progress of the reactions were monitored by TLC (thin-layer chromatography) under 254 nm UV light. Products were purified by chromatography on 200-300 mesh silica gels. <sup>1</sup>H NMR and <sup>13</sup>C NMR spectra were recorded in CDCl<sub>3</sub> at room temperature (20 ± 2 °C) with Bruker Avance 400 MHz spectrometer operating at 400 MHz and 100 MHz, respectively. Chemical shifts are given as  $\delta$  value (ppm) with reference to tetramethylsilane (TMS) as an internal standard. The peak patterns are indicated as follows: s, singlet; d, doublet; t, triplet; m, multiplet; q, quartet. The coupling constants, *J*, are reported in Hertz (Hz). High-resolution mass spectra (HRMS) were obtained on Agilent Technologies 6530 Accurate mass Q-TOF LC/MS with ESI as ion source and Agilent Technologies 7250 Accurate-Mass Quadrupole Time-of-Flight (Q-TOF) GC/MS with EI as ion source. GC-MS analysis of the products were performed on Thermo Fisher DSQ II with EI ion source. Injection port was set at 220 °C, ion source temperature and AUX temperature zone were set at 250 °C, and injection volume was 1.0  $\mu$ L. Fluorescence quenching experiments were performed by Hitachi F7000 fluorescence spectrometer.

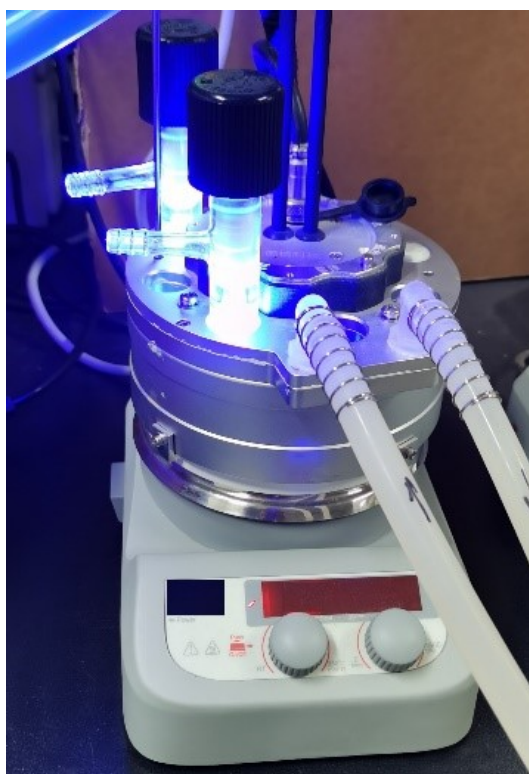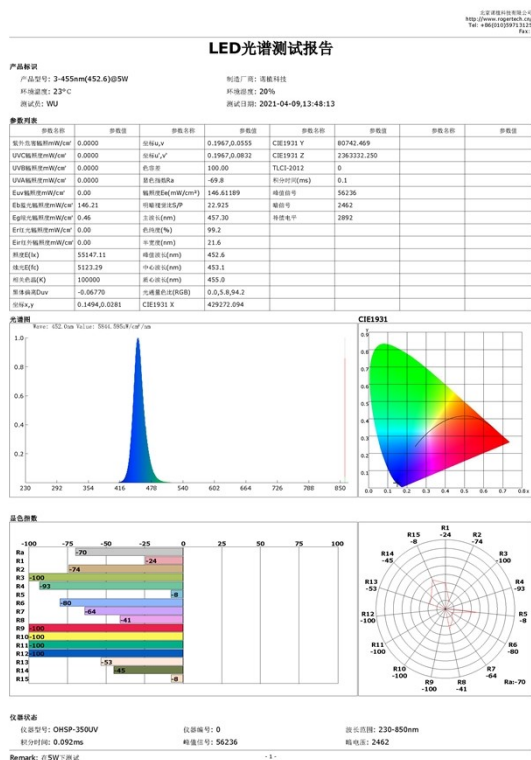

**Figure S1** The photo reactor (left) and the blue LED light source test report (right).

## 2. General synthetic procedure for thiosulfonates and selenosulfonates

**2.1 Synthesis of thiosulfonates.** Thiosulfonates were synthesized according to literature (*Org. Lett.*, 2020, **22**, 4908) with minor modifications using disulfides, sodium benzenesulfonates and iodine in  $\text{CH}_2\text{Cl}_2$ . After completion of the reaction, sodium thiosulfate was added to remove the excess iodine. Then, the mixture was washed by brine; the organic phase were combined and dried over anhydrous  $\text{Na}_2\text{SO}_4$ . After filtration and evaporation of the solvent, the crude product was purified by silica gel column chromatography (petroleum ether/ethyl acetate = 10/1, v/v) to give the corresponding desired products (Scheme S1).

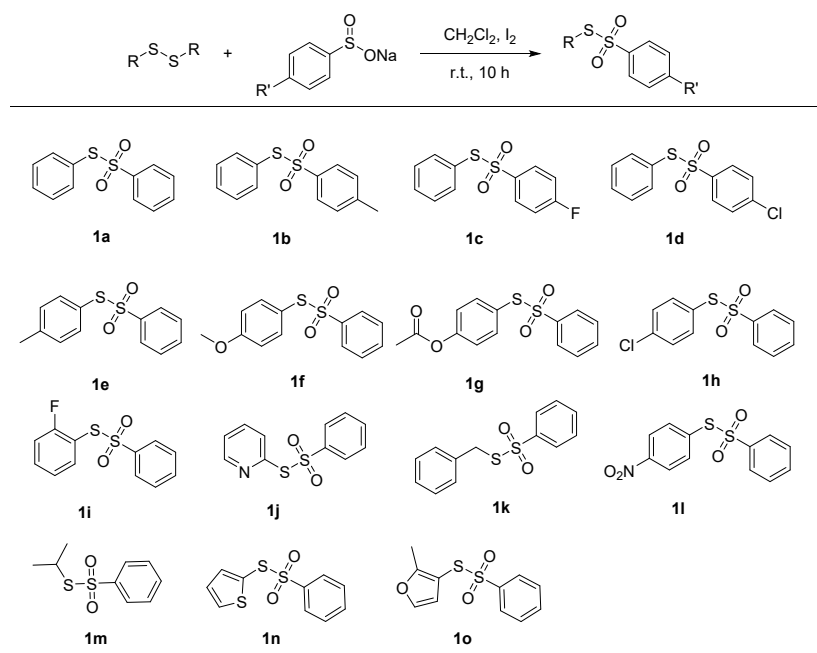

**Scheme S1** Structure of the synthesized thiosulfonates **1a-o**

**2.2 Synthesis of selenosulfonates.** *Se*-phenyl benzenesulfonoselenoate and *Se*-benzyl benzenesulfonoselenoate were synthesized according to literature (*J. Org. Chem.*, 2019, **84**, 8100.) by the use of 1,2-diphenyldislane or 1,2-dibenzilyldislane and sodium benzenesulfonate with [bis(trifluoroacetoxy)iodo]benzene (PIFA) in dichloromethane at 0 °C to room temperature for 3 h. The desired product was purified by silica gel column chromatography (petroleum ether : ethyl acetate = 10 : 1, v/v).

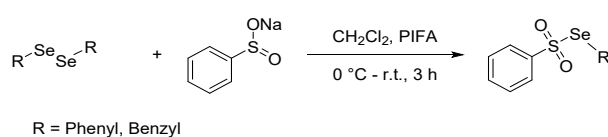

**Scheme S2** Synthesis of selenosulfonates

### 3. General synthetic procedure for products 3

Thiosulfonates (**1**, 0.4 mmol), TBHP (0.4 mmol, 70% aqueous solution), Na<sub>2</sub>-eosin Y (2.5 mol%) and K<sub>2</sub>CO<sub>3</sub> (1.0 equiv.) were dissolved in corresponding ethers (**2**, 2.0 mL) in a 25 mL reaction tube, and then the mixture was stirred with the irradiation of 5 W blue LED light under N<sub>2</sub> at room temperature for 12 h. After reaction, the mixture was diluted with brine and extracted with CH<sub>2</sub>Cl<sub>2</sub> (15 mL × 3). The organic layers were combined and dried over anhydrous Na<sub>2</sub>SO<sub>4</sub>. The residue was

purified by silica gel column chromatography (petroleum ether/ethyl acetate = 10~20/1, v/v) to afford the desired products **3**.

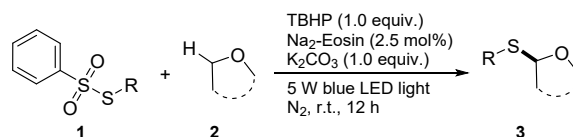

**Scheme S3** Synthesis of products **3**

#### 4. Investigations of photocatalyst, oxidant and base on the model reaction

**Table S1** Optimization of reaction conditions.<sup>a</sup>

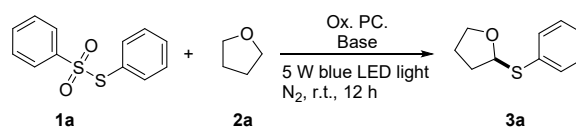

| Entry | <b>1</b>  | Ox.                                          | PC.                                  | Base                           | Yield (%) <sup>b</sup> |
|-------|-----------|----------------------------------------------|--------------------------------------|--------------------------------|------------------------|
| 1     | <b>1a</b> | TBHP                                         | RhB                                  | K <sub>2</sub> CO <sub>3</sub> | 63                     |
| 2     | <b>1a</b> | TBHP                                         | EB                                   | K <sub>2</sub> CO <sub>3</sub> | 77                     |
| 3     | <b>1a</b> | TBHP                                         | MB                                   | K <sub>2</sub> CO <sub>3</sub> | 73                     |
| 4     | <b>1a</b> | TBHP                                         | RB                                   | K <sub>2</sub> CO <sub>3</sub> | 62                     |
| 5     | <b>1a</b> | TBHP                                         | FL                                   | K <sub>2</sub> CO <sub>3</sub> | 61                     |
| 6     | <b>1a</b> | TBHP                                         | EYH <sub>2</sub>                     | K <sub>2</sub> CO <sub>3</sub> | 67                     |
| 7     | <b>1a</b> | TBHP                                         | Na <sub>2</sub> -EY                  | K <sub>2</sub> CO <sub>3</sub> | 83                     |
| 8     | <b>1a</b> | TBHP                                         | Ru(bpy) <sub>3</sub> Cl <sub>2</sub> | K <sub>2</sub> CO <sub>3</sub> | 43                     |
| 9     | <b>1a</b> | DTBP                                         | Na <sub>2</sub> -EY                  | K <sub>2</sub> CO <sub>3</sub> | 25                     |
| 10    | <b>1a</b> | K <sub>2</sub> S <sub>2</sub> O <sub>8</sub> | Na <sub>2</sub> -EY                  | K <sub>2</sub> CO <sub>3</sub> | 17                     |
| 11    | <b>1a</b> | TBPB                                         | Na <sub>2</sub> -EY                  | K <sub>2</sub> CO <sub>3</sub> | trace                  |
| 12    | <b>1a</b> | BPO                                          | Na <sub>2</sub> -EY                  | K <sub>2</sub> CO <sub>3</sub> | trace                  |
| 13    | <b>1a</b> | H <sub>2</sub> O <sub>2</sub>                | Na <sub>2</sub> -EY                  | K <sub>2</sub> CO <sub>3</sub> | 33                     |
| 14    | <b>1a</b> | <i>m</i> -CPBA                               | Na <sub>2</sub> -EY                  | K <sub>2</sub> CO <sub>3</sub> | trace                  |
| 15    | <b>1a</b> | TBHP                                         | Na <sub>2</sub> -EY                  | KOH                            | 44                     |
| 16    | <b>1a</b> | TBHP                                         | Na <sub>2</sub> -EY                  | NEt <sub>3</sub>               | 38                     |
| 17    | <b>1a</b> | TBHP                                         | Na <sub>2</sub> -EY                  | NaHCO <sub>3</sub>             | 21                     |
| 18    | <b>1a</b> | -                                            | Na <sub>2</sub> -EY                  | K <sub>2</sub> CO <sub>3</sub> | n.r.                   |
| 19    | <b>1a</b> | TBHP                                         | Na <sub>2</sub> -EY-                 | -                              | n.r.                   |

<sup>a</sup> Reaction conditions: **1a** (0.4 mmol), oxidant (1.0 equiv.), photocatalyst (2.5 mol%) and base (1.0 equiv.) were mixed in THF (**2a**, 2.0 mL) with the irradiation of 5 W blue LED light under N<sub>2</sub> atmosphere at room temperature for 12 h. <sup>b</sup> Isolated yield based on **1** were provided. RhB = rhodamine B, EB = eosin B, MB = methylene blue, RB = rose bengal, FL = fluorescein, EYH<sub>2</sub> = eosin Y, Na<sub>2</sub>-EY = Na<sub>2</sub>-eosin Y, TBHP = *tert*-butyl hydroperoxide (70% aqueous solution), DTBP = di-*tert*-butyl peroxide, TBPB = *tert*-butyl peroxybenzoate, BPO = benzoyl peroxide, H<sub>2</sub>O<sub>2</sub> was 30% aqueous solution, *m*-CPBA = *m*-chloroperoxybenzoic acid. n.r. = no reaction.

## 5. Mechanism Study

### 5.1 Experiment interfered with radical scavenger

In a 25 mL reaction tube, *S*-phenyl benzenethiosulfonate (**1a**, 0.4 mmol), TBHP (0.4 mmol, 70% aqueous solution), Na<sub>2</sub>-eosin Y (2.5 mol%), K<sub>2</sub>CO<sub>3</sub> (1.0 equiv.) and 2.0 equiv. of (2,2,6,6-tetramethylpiperidin-1-yl)oxidanyl (TEMPO) or 1,1-diphenylethylene (ASYM) were dissolved in THF (2.0 mL), respectively. The mixtures were stirred under standard reaction conditions for 12 h and then detected by HRMS.

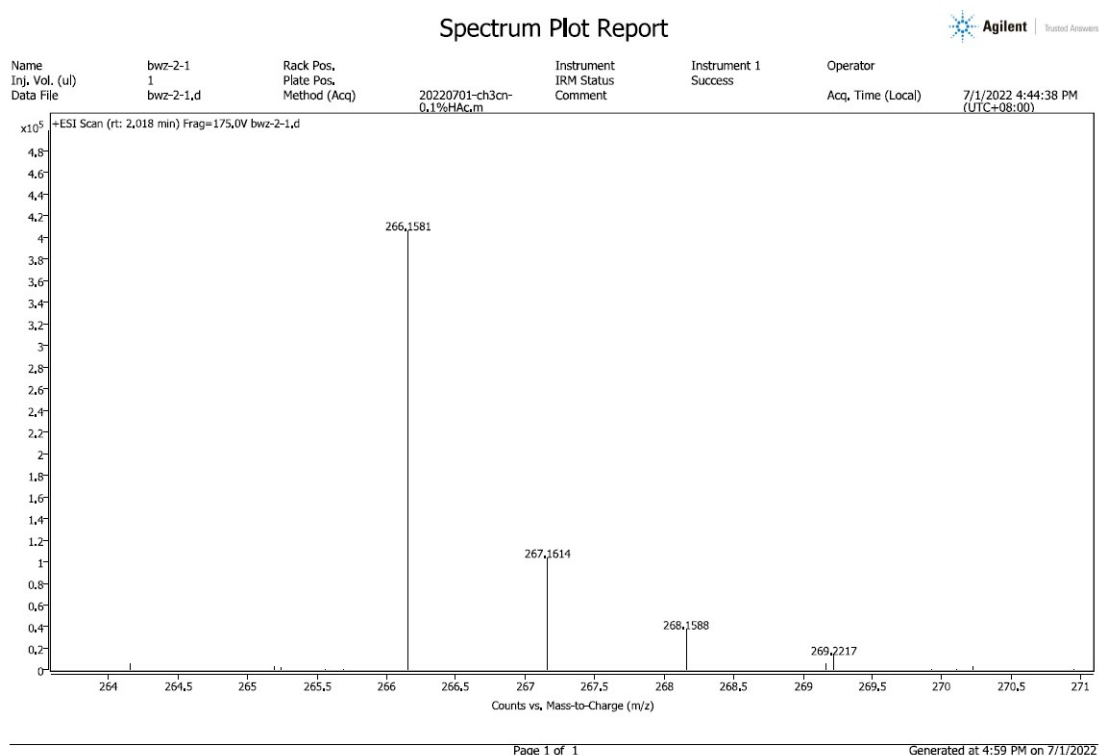

**Figure S2** HRMS spectrum of the benzenesulfenyl radical/TEMPO adduct **5**

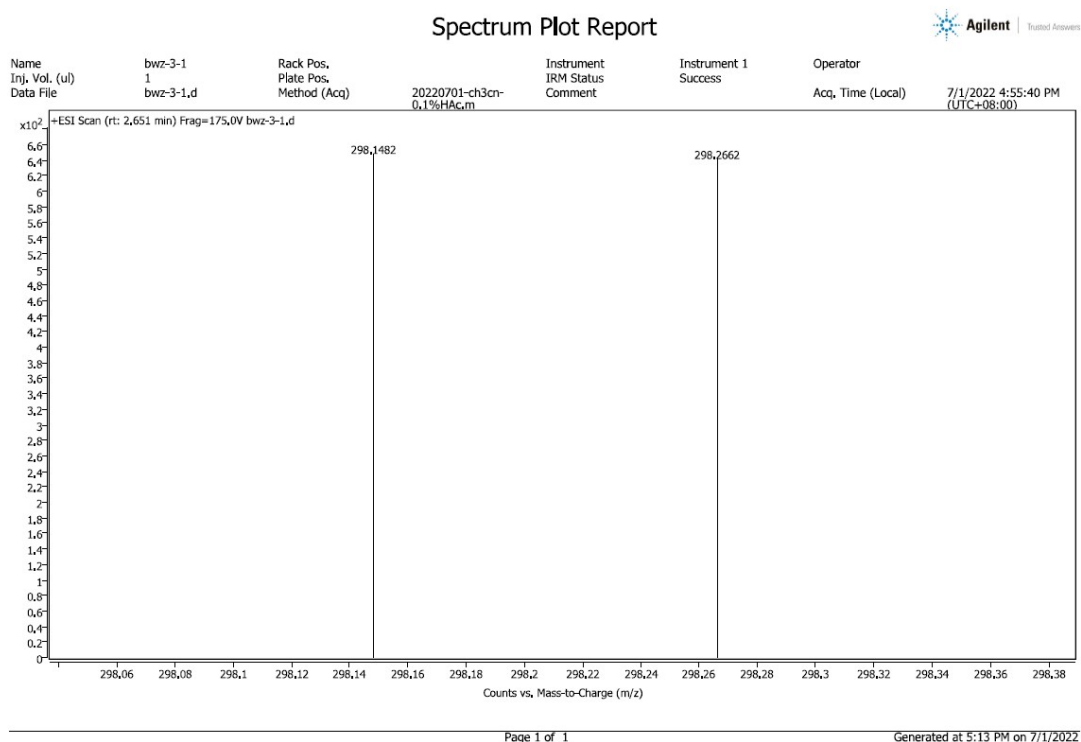

**Figure S3** HRMS spectrum of the benzenesulfonyl radical/TEMPO adduct **6**

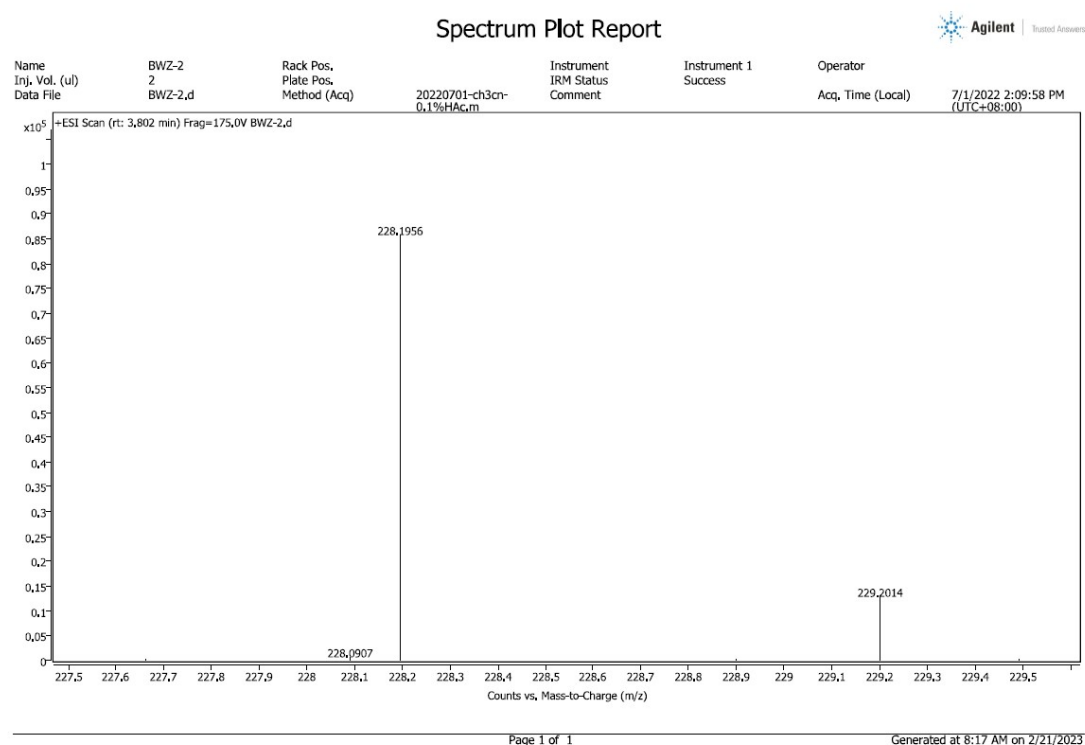

**Figure S4** HRMS spectrum of the  $\alpha$ -alkoxyalkyl radical /TEMPO adduct **7**

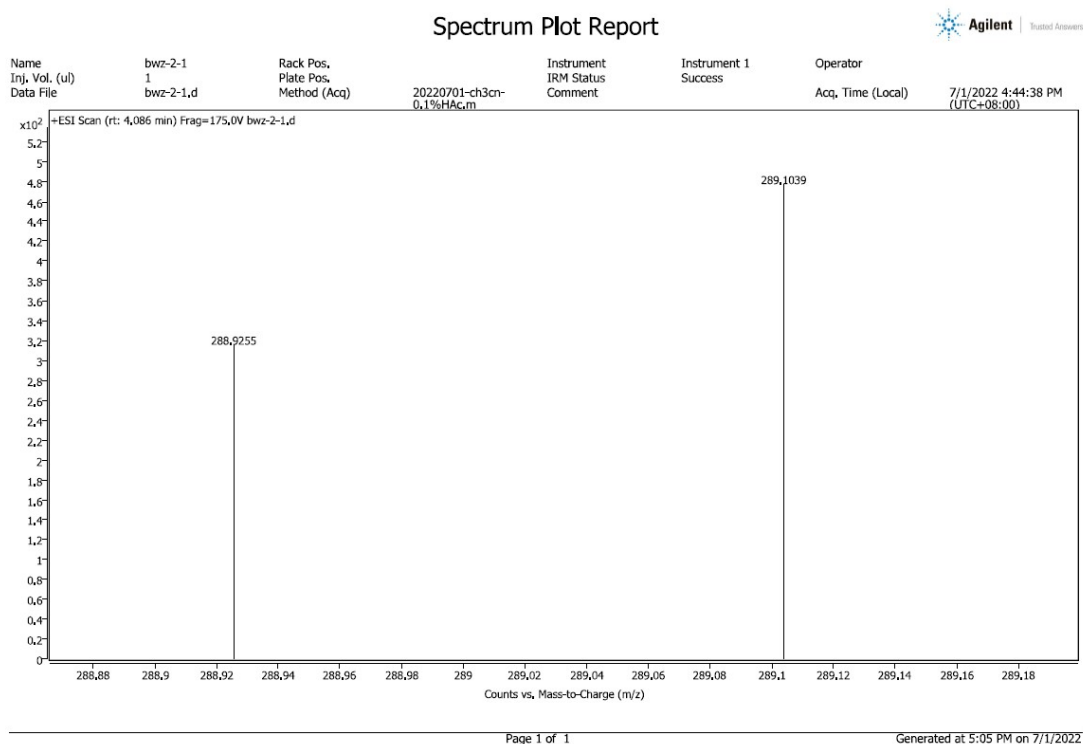

**Figure S5** HRMS Spectrum of the benzenesulfonyl radical /ASYM adduct **8**

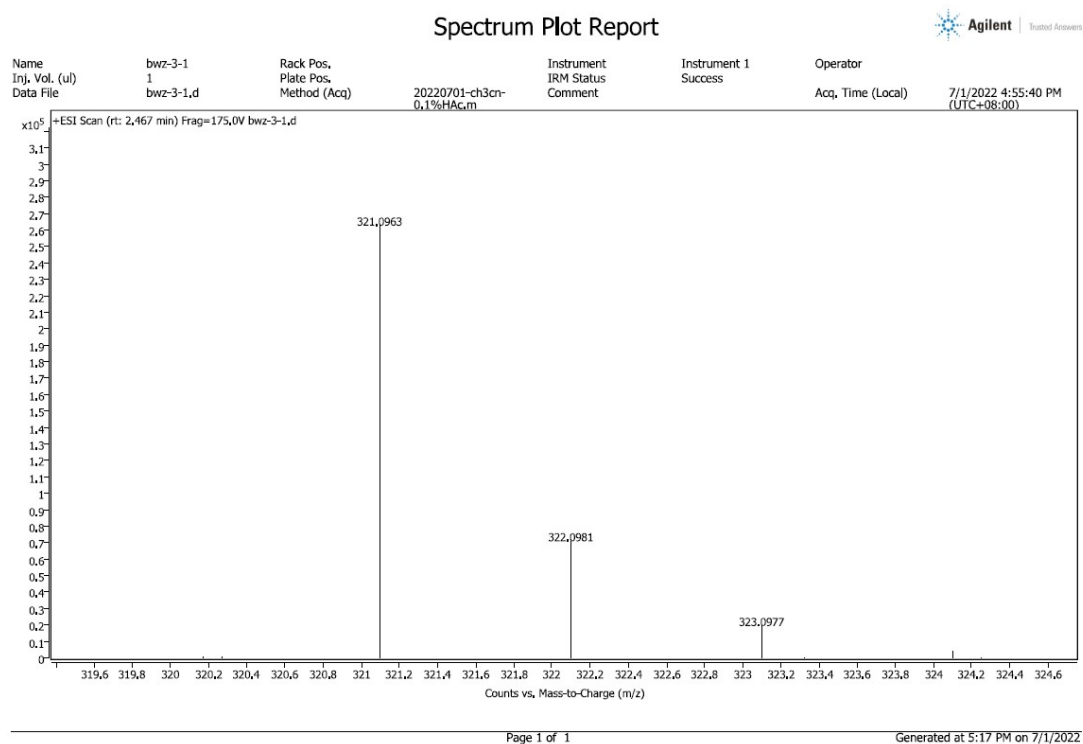

**Figure S6** HRMS spectrum of the benzenesulfonyl radical /ASYM adduct **9**

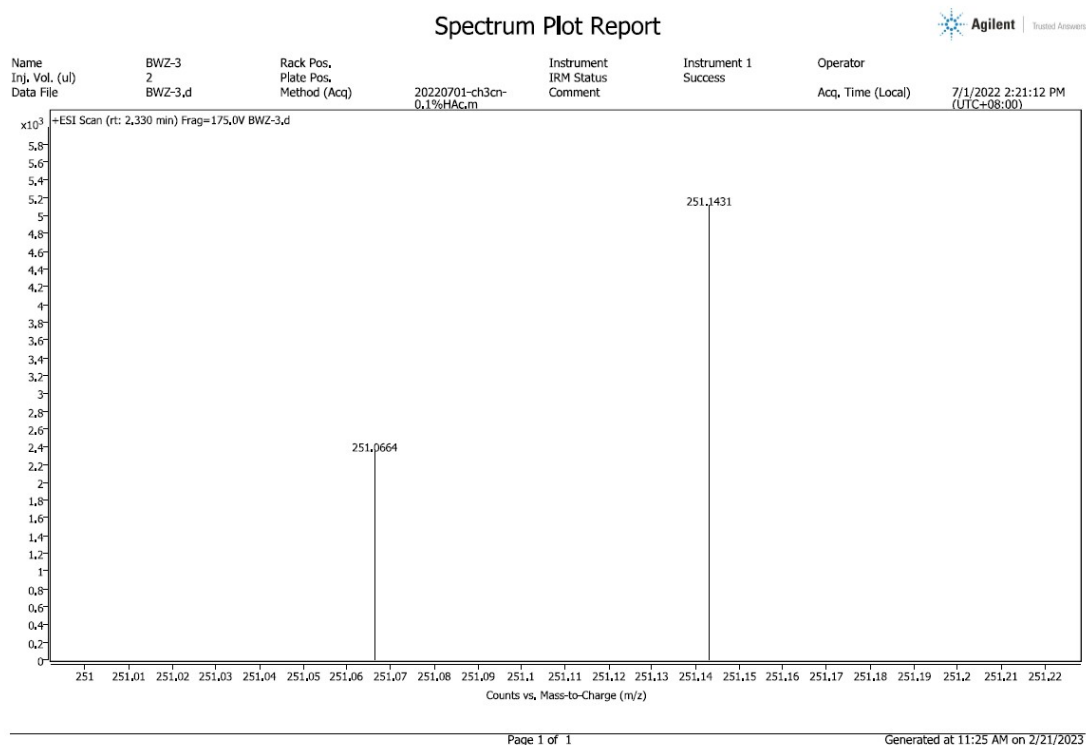

**Figure S7** HRMS spectrum of the  $\alpha$ -alkoxyalkyl radical / ASYM adduct **10**

## 5.2 Fluorescence quenching experiments

A stock solution of Na<sub>2</sub>-eosin Y (5 mM in THF) was prepared for the quenching experiment. 200  $\mu$ L Na<sub>2</sub>-eosin Y stock solution was diluted to 2.0 mL with THF in a quartz cuvette (1 cm  $\times$  1 cm). The fluorescence excitation and emission spectra were firstly recorded as shown below. The maximum excitation/emission wavelength were detected as 461/559 nm. Then, quenching experiments were performed with addition of TBHP (70% aqueous solution) or **1a**, respectively.

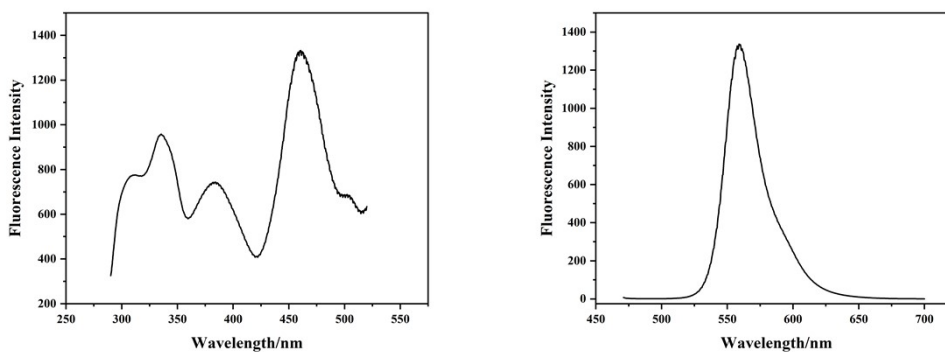

**Figure S8** Fluorescence excitation (left) and emission (right) spectra of Na<sub>2</sub>-eosin Y ( $5 \times 10^{-4}$  M) in THF

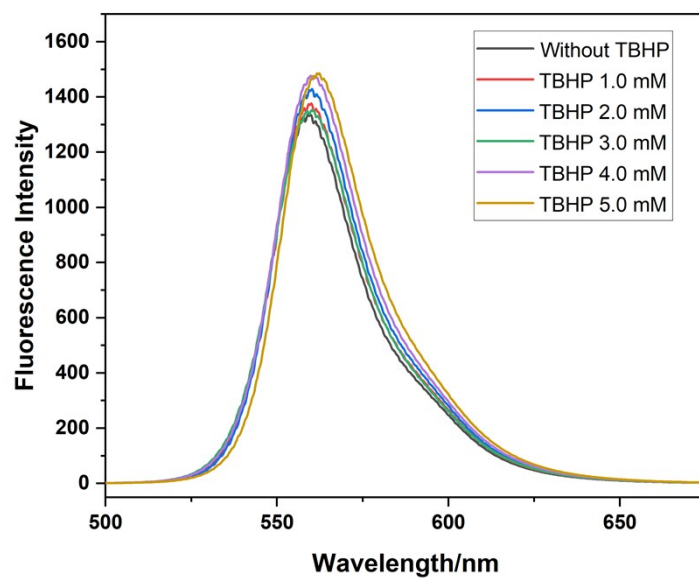

**Figure S9** Fluorescence emission spectra of  $\text{Na}_2$ -eosin Y ( $5 \times 10^{-4}$  M) in THF with TBHP (1.0 - 5.0 mM)

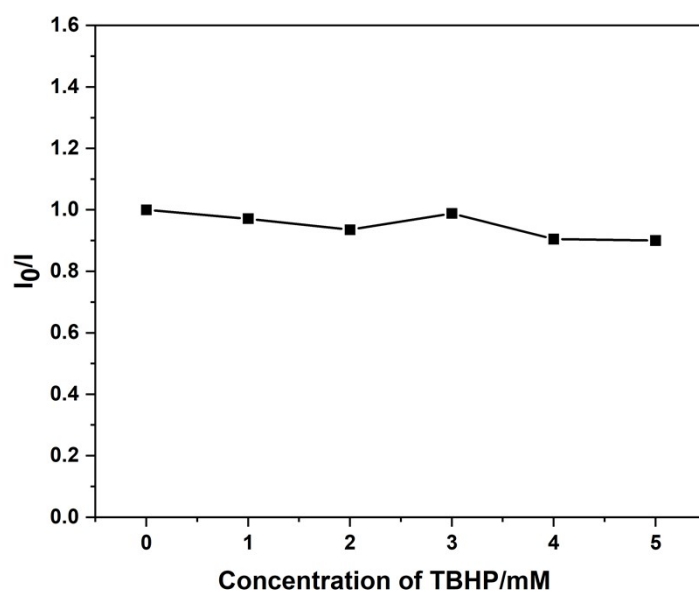

**Figure S10** The linear relationship between  $I_0/I$  ( $I_0$  and  $I$  are the fluorescence intensities before and after the addition of TBHP) and the concentration of TBHP

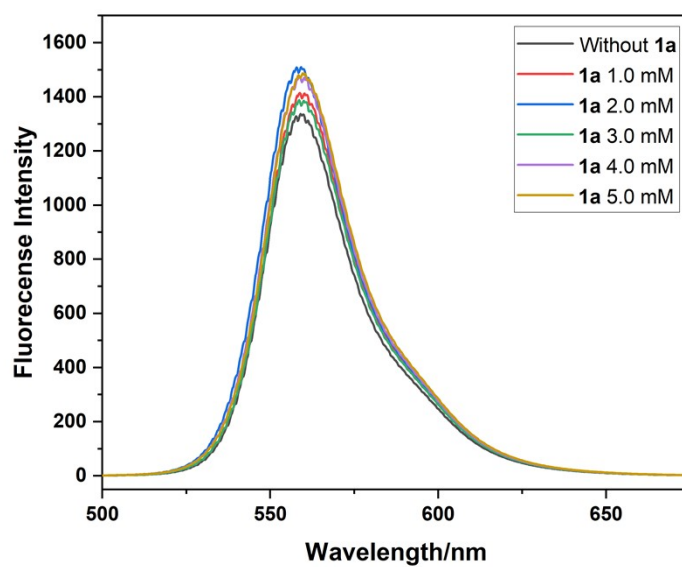

**Figure S11** Fluorescence emission spectra of  $\text{Na}_2\text{-eosin Y}$  ( $5 \times 10^{-4} \text{ M}$ ) in THF with **1a** (1.0 - 5.0 mM)

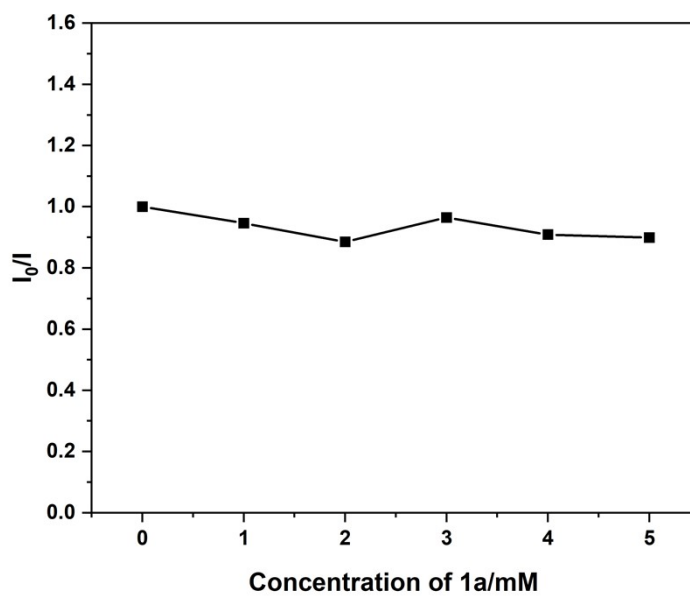

**Figure S12** The linear relationship between  $I_0/I$  ( $I_0$  and  $I$  are the fluorescence intensities before and after the addition of **1a**) and the concentration of **1a**

## 6. Characterization data of compounds 3a-aa and 4a-c

### 2-(phenylthio)tetrahydrofuran (3a)

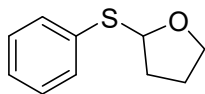

Pale oil, yield: 83%.  $^1\text{H}$  NMR ( $\text{CDCl}_3$ , 400 MHz):  $\delta$ : 7.51 (m, 2H), 7.29 (m, 2H), 7.22 (m, 1H), 5.65 (m, 1H), 4.06-3.94 (m, 2H), 2.39-2.34 (m, 1H), 2.04-1.90 (m, 2H), 1.90-1.87 (m, 1H);  $^{13}\text{C}$  NMR ( $\text{CDCl}_3$ , 100 MHz)  $\delta$ : 135.7, 131.1, 128.8, 126.8, 87.2, 67.3, 32.7, 24.8. GC-HRMS (EI) for  $\text{C}_{10}\text{H}_{12}\text{OS}$  ( $m/z$ ): calcd. 180.0609, found 180.0583.

### 2-(*p*-tolylthio)tetrahydrofuran (3b)

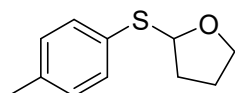

Pale oil, yield: 69%.  $^1\text{H}$  NMR ( $\text{CDCl}_3$ , 400 MHz):  $\delta$ : 7.40 (m, 2H), 7.11 (m, 2H), 5.57 (m, 1H), 4.03-3.93 (m, 2H), 2.36-2.30 (m, 4H), 2.03-1.84 (m, 3H);  $^{13}\text{C}$  NMR ( $\text{CDCl}_3$ , 100 MHz)  $\delta$ : 137.0, 131.9, 131.7, 129.6, 87.6, 67.2, 32.6, 24.8, 21.1. GC-MS (EI) for  $\text{C}_{11}\text{H}_{14}\text{OS}$  ( $m/z$ ): calcd. 194.08, found 194.10.

### 2-((4-methoxyphenyl)thio)tetrahydrofuran (3c)

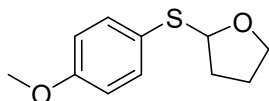

Pale oil, yield: 73%.  $^1\text{H}$  NMR ( $\text{CDCl}_3$ , 400 MHz):  $\delta$ : 7.46 (m, 2H), 6.85 (m, 2H), 5.47 (m, 1H), 4.02-3.90 (m, 2H), 3.79 (s, 3H), 2.34-2.27 (m, 1H), 2.00-1.83 (m, 3H);  $^{13}\text{C}$  NMR ( $\text{CDCl}_3$ , 100 MHz)  $\delta$ : 159.4, 134.6, 125.6, 114.4, 88.2, 67.2, 55.3, 32.5, 24.8. GC-MS (EI) for  $\text{C}_{11}\text{H}_{14}\text{O}_2\text{S}$  ( $m/z$ ): calcd. 210.07, found 210.08.

### 2-((2-fluorophenyl)thio)tetrahydrofuran (3d)

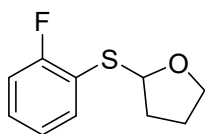

Pale oil, yield: 81%.  $^1\text{H}$  NMR ( $\text{CDCl}_3$ , 400 MHz):  $\delta$ : 7.60 (m, 1H), 7.25 (m, 1H), 7.12-7.04 (m, 2H), 5.70 (m, 1H), 4.07-3.93 (m, 2H), 2.40-2.33 (m, 1H), 2.08-2.00 (m, 2H), 1.92-1.87 (m, 1H);  $^{13}\text{C}$  NMR ( $\text{CDCl}_3$ , 100 MHz)  $\delta$ : 162.7 and 160.3, 133.9, 129.0 and 128.9, 124.52 and 124.48, 122.4 and 122.2, 115.7 and 115.4, 86.44 and 86.43, 67.4, 32.7, 24.6. GC-MS (EI) for  $\text{C}_{10}\text{H}_{11}\text{FOS}$  ( $m/z$ ): calcd. 198.05, found 198.04.

### 2-((4-chlorophenyl)thio)tetrahydrofuran (3e)

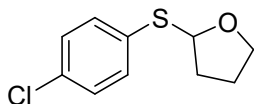

Pale oil, yield: 85%.  $^1\text{H}$  NMR ( $\text{CDCl}_3$ , 400 MHz):  $\delta$ : 7.43 (m, 2H), 7.26 (m, 2H), 5.60 (m, 1H), 4.04-3.93 (m, 2H), 2.39-2.34 (m, 1H), 2.04-1.86 (m, 3H);  $^{13}\text{C}$  NMR ( $\text{CDCl}_3$ , 100 MHz)  $\delta$ : 134.2, 133.0, 132.4, 128.9, 87.3, 67.3, 32.6, 24.8. GC-MS (EI) for  $\text{C}_{10}\text{H}_{11}\text{ClOS}$  ( $m/z$ ): calcd. 214.02, found 214.03.

### 2-((tetrahydrofuran-2-yl)thio)phenyl acetate (3f)

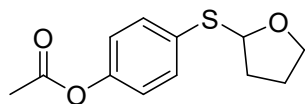

Pale oil, yield: 77%.  $^1\text{H}$  NMR ( $\text{CDCl}_3$ , 400 MHz):  $\delta$ : 7.52 (m, 2H), 7.02 (m, 2H), 5.60 (m, 1H), 4.03-3.93 (m, 2H), 2.38-2.33 (m, 1H), 2.28 (s, 3H), 2.03-1.87 (m, 3H);  $^{13}\text{C}$  NMR ( $\text{CDCl}_3$ , 100 MHz)  $\delta$ : 169.3, 149.8, 132.5, 122.0, 87.5, 67.2, 32.6, 24.8, 21.1. GC-MS (EI) for  $\text{C}_{12}\text{H}_{14}\text{O}_3\text{S}$  ( $m/z$ ): calcd. 238.07, found 238.08.

### 2-(thiophen-2-ylthio)tetrahydrofuran (3g)

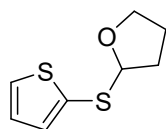

Pale oil, yield: 75%.  $^1\text{H}$  NMR ( $\text{CDCl}_3$ , 400 MHz):  $\delta$ : 7.36 (m, 1H), 7.17 (m, 1H), 7.00 (m, 1H), 5.43 (m, 1H), 4.06-4.00 (m, 1H), 3.98-3.93 (m, 1H), 2.32-2.26 (m, 1H), 2.01-1.97 (m, 2H), 1.95-1.84 (m, 1H);  $^{13}\text{C}$  NMR ( $\text{CDCl}_3$ , 100 MHz)  $\delta$ : 134.3, 132.4, 129.9, 127.5, 89.5, 67.5, 32.1, 24.6. GC-MS (EI) for  $\text{C}_8\text{H}_{10}\text{OS}_2$  ( $m/z$ ): calcd. 186.02, found 186.10.

### 2-methyl-3-((tetrahydrofuran-2-yl)thio)furan (3h)

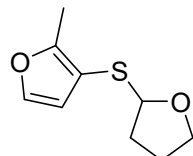

Pale oil, yield: 69%.  $^1\text{H}$  NMR ( $\text{CDCl}_3$ , 400 MHz):  $\delta$ : 7.27 (m, 1H), 6.41 (m, 1H), 5.32 (m, 1H), 4.02-3.93 (m, 1H), 3.92-3.88 (m, 1H), 2.35 (s, 3H), 2.28-2.22 (m, 1H), 2.01-1.84 (m, 3H);  $^{13}\text{C}$  NMR ( $\text{CDCl}_3$ , 100 MHz)  $\delta$ : 155.4, 140.4, 115.5, 109.3, 87.7, 67.2, 32.3, 24.8, 11.9. GC-MS (EI) for  $\text{C}_9\text{H}_{12}\text{O}_2\text{S}$  ( $m/z$ ): calcd. 184.06, found 184.05.

### 2-(benzylthio)tetrahydrofuran (3i)

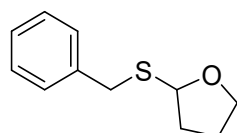

Pale oil, yield: 78%.  $^1\text{H}$  NMR ( $\text{CDCl}_3$ , 400 MHz):  $\delta$ : 7.36-7.29 (m, 4H), 7.23 (m, 1H), 5.23 (m, 1H), 3.98-3.88 (m, 2H), 3.77-3.73 (m, 2H), 2.22-2.18 (m, 1H), 2.02-1.97 (m, 1H), 1.97-1.77 (m, 2H);  $^{13}\text{C}$  NMR ( $\text{CDCl}_3$ , 100 MHz)  $\delta$ : 138.6, 129.0, 128.4, 126.8, 83.0, 66.8, 32.0, 32.1, 24.8. GC-MS (EI) for  $\text{C}_{11}\text{H}_{14}\text{OS}$  ( $m/z$ ): calcd. 194.08, found 194.10.

**2-(phenylthio)-1,4-dioxane (3l)**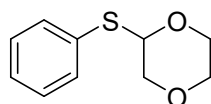

Pale oil, yield: 80%.  $^1\text{H}$  NMR ( $\text{CDCl}_3$ , 400 MHz):  $\delta$ : 7.50 (m, 2H), 7.32-7.26 (m, 3H), 5.12 (m, 1H), 4.25-4.20 (m, 1H), 4.00-3.96 (m, 1H), 3.74-3.65 (m, 4H);  $^{13}\text{C}$  NMR ( $\text{CDCl}_3$ , 100 MHz)  $\delta$ : 134.0, 131.6, 129.0, 127.4, 83.3, 70.0, 66.5, 63.8. GC-MS (EI) for  $\text{C}_{10}\text{H}_{12}\text{O}_2\text{S}$  (m/z): calcd. 196.06, found 196.07.

**2-(*p*-tolylthio)-1,4-dioxane (3m)**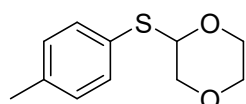

Pale oil, yield: 76%.  $^1\text{H}$  NMR ( $\text{CDCl}_3$ , 400 MHz):  $\delta$ : 7.41 (m, 2H), 7.11 (m, 2H), 5.02 (m, 1H), 4.22-4.18 (m, 1H), 3.98-3.94 (m, 1H), 3.72-3.65 (m, 4H), 2.33 (s, 3H);  $^{13}\text{C}$  NMR ( $\text{CDCl}_3$ , 100 MHz)  $\delta$ : 137.7, 136.5, 132.4, 129.7, 83.5, 69.9, 66.4, 64.0, 21.1. GC-MS (EI) for  $\text{C}_{11}\text{H}_{14}\text{O}_2\text{S}$  (m/z): calcd. 210.07, found 210.07.

**2-((4-chlorophenyl)thio)-1,4-dioxane (3n)**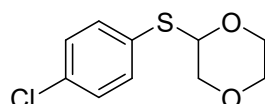

Pale oil, yield: 83%.  $^1\text{H}$  NMR ( $\text{CDCl}_3$ , 400 MHz):  $\delta$ : 7.43 (m, 2H), 7.27 (m, 2H), 5.08 (m, 1H), 4.26-4.21 (m, 1H), 3.99-3.95 (m, 1H), 3.74-3.64 (m, 4H);  $^{13}\text{C}$  NMR ( $\text{CDCl}_3$ , 100 MHz)  $\delta$ : 133.6, 132.9, 132.5, 129.1, 83.3, 69.8, 66.5, 63.6. GC-MS (EI) for  $\text{C}_{10}\text{H}_{11}\text{ClO}_2\text{S}$  (m/z): calcd. 230.02, found 230.02.

**2-(thiophen-2-ylthio)-1,4-dioxane (3o)**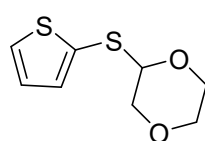

Pale oil, yield: 67%.  $^1\text{H}$  NMR ( $\text{CDCl}_3$ , 400 MHz):  $\delta$ : 7.39 (m, 1H), 7.19 (m, 1H), 7.00 (m, 1H), 4.91 (m, 1H), 4.28-4.23 (m, 1H), 3.96-3.93 (m, 1H), 3.72-3.66 (m, 4H);  $^{13}\text{C}$  NMR ( $\text{CDCl}_3$ , 100 MHz)  $\delta$ : 135.0, 130.4, 130.3, 127.5, 84.5, 69.4, 66.5, 63.7. GC-MS (EI) for  $\text{C}_8\text{H}_{10}\text{O}_2\text{S}_2$  (m/z): calcd. 202.01, found 202.01.

**2-(phenylthio)tetrahydro-2H-pyran (3p)**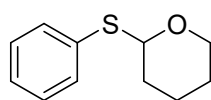

Pale oil, yield: 71%.  $^1\text{H}$  NMR ( $\text{CDCl}_3$ , 400 MHz):  $\delta$ : 7.48 (m, 2H), 7.29 (m, 2H), 7.26-7.19 (m, 1H), 5.21 (m, 1H), 4.20-4.15 (m, 1H), 3.61-3.56 (m, 1H), 2.04-1.99 (m, 1H), 1.86-1.81 (m, 2H), 1.67-1.61 (m, 3H);  $^{13}\text{C}$  NMR ( $\text{CDCl}_3$ , 100 MHz)  $\delta$ : 135.4, 130.9, 128.8, 126.7, 85.3, 64.5, 31.6, 25.5,

21.7. GC-MS (EI) for C<sub>11</sub>H<sub>14</sub>OS (m/z): calcd. 194.08, found 194.08.

**2-(p-tolylthio)tetrahydro-2H-pyran (3q)**

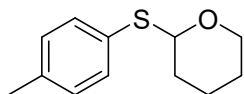

Pale oil, yield: 67%. <sup>1</sup>H NMR (CDCl<sub>3</sub>, 400 MHz): δ: 7.38 (m, 2H), 7.10 (m, 2H), 5.12 (m, 1H), 4.20-4.14 (m, 1H), 3.59-3.53 (m, 1H), 2.32 (s, 3H), 2.04-1.98 (m, 1H), 1.87-1.78 (m, 2H), 1.78-1.60 (m, 3H); <sup>13</sup>C NMR (CDCl<sub>3</sub>, 100 MHz) δ: 136.9, 131.7, 131.4, 129.6, 85.7, 64.6, 31.6, 25.5, 21.7, 21.1.

**2-((4-chlorophenyl)thio)tetrahydro-2H-pyran (3r)**

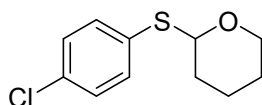

Pale oil, yield: 75%. <sup>1</sup>H NMR (CDCl<sub>3</sub>, 400 MHz): δ: 7.40 (m, 2H), 7.25 (m, 2H), 5.17 (m, 1H), 4.18-4.12 (m, 1H), 3.61-3.55 (m, 1H), 2.03-2.00 (m, 1H), 1.85-1.81 (m, 2H), 1.66-1.61 (m, 3H); <sup>13</sup>C NMR (CDCl<sub>3</sub>, 100 MHz) δ: 133.9, 132.8, 132.2, 128.9, 85.4, 64.4, 31.5, 25.5, 21.5. GC-MS (EI) for C<sub>11</sub>H<sub>13</sub>ClOS (m/z): calcd. 228.04, found 228.04.

**2-(thiophen-2-ylthio)tetrahydro-2H-pyran (3s)**

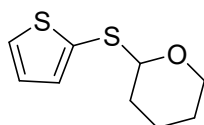

Pale oil, yield: 63%. <sup>1</sup>H NMR (CDCl<sub>3</sub>, 400 MHz): δ: 7.36 (m, 1H), 7.15 (m, 1H), 6.99 (m, 1H), 5.00 (m, 1H), 4.22-4.16 (m, 1H), 3.61-3.56 (m, 1H), 2.02-1.95 (m, 1H), 1.86-1.77 (m, 2H), 1.64-1.60 (m, 3H); <sup>13</sup>C NMR (CDCl<sub>3</sub>, 100 MHz) δ: 134.1, 132.0, 129.6, 127.4, 87.3, 64.4, 30.9, 25.5, 21.3. GC-MS (EI) for C<sub>9</sub>H<sub>12</sub>OS<sub>2</sub> (m/z): calcd. 200.03, found 200.04.

**(tert-butoxymethyl)(phenyl)sulfane (3t)**

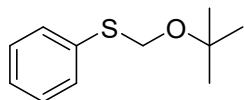

Pale oil, yield: 57%. <sup>1</sup>H NMR (CDCl<sub>3</sub>, 400 MHz): δ: 7.49 (m, 2H), 7.29-7.26 (m, 2H), 7.20 (m, 1H), 4.90 (s, 2H), 1.26 (s, 9H); <sup>13</sup>C NMR (CDCl<sub>3</sub>, 100 MHz) δ: 136.6, 130.0, 128.8, 126.4, 75.3, 68.2, 27.8. GC-MS (EI) for C<sub>11</sub>H<sub>16</sub>OS (m/z): calcd. 196.09, found 196.09.

**(tert-butoxymethyl)(4-chlorophenyl)sulfane (3u)**

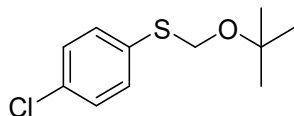

Pale oil, yield: 62%. <sup>1</sup>H NMR (CDCl<sub>3</sub>, 400 MHz): δ: 7.42 (m, 2H), 7.25 (m, 2H), 4.87 (s, 2H), 1.55 (s, 9H); <sup>13</sup>C NMR (CDCl<sub>3</sub>, 100 MHz) δ: 135.1, 132.6, 131.4, 128.9, 75.5, 68.3, 27.8. GC-MS (EI)

for  $C_{10}H_{13}ClO_2S$  (m/z): calcd. 230.05, found 230.05.

**(4-chlorophenyl)(1-methoxycyclopentyl)sulfane (3x-i) and (4-chlorophenyl)((cyclopentyloxy)-methyl)sulfane (3x-ii) (3x)**

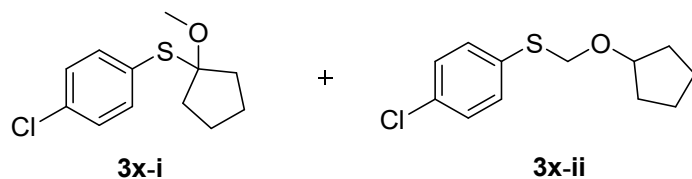

Pale oil, yield: 75% (**3x-i** : **3x-ii** = 2.5 : 1.0).  $^1H$  NMR ( $CDCl_3$ , 400 MHz):  $\delta$ : 7.40 (m, 3H), 7.25 (m, 3H), 4.93-4.33 (m, 1H), 3.46 (s, 3H), 1.87-1.68 (m, 11H);  $^{13}C$  NMR ( $CDCl_3$ , 100 MHz)  $\delta$ : 134.8 and 134.7, 133.6 and 132.9, 132.6 and 131.4, 129.0 and 128.7, 100.4, 79.1 and 73.9, 51.4, 38.0, 32.0, 23.5 and 23.2. GC-MS (EI) for  $C_{12}H_{15}ClOS$  (m/z): calcd. 242.05, found 242.04.

**2-((4-chlorophenyl)thio)-2-methyltetrahydrofuran (3y-i) and 2-((4-chlorophenyl)thio)-5-methyltetrahydrofuran (3y-ii) (3y)**

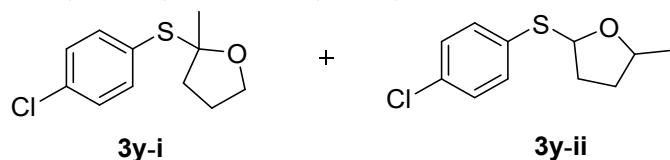

Pale oil, yield: 81% (**3y-i** : **3y-ii** = 3.0 : 1.0).  $^1H$  NMR ( $CDCl_3$ , 400 MHz):  $\delta$ : 8.36 (m, 2H), 7.86 (m, 2H), 1.58 (s, 9H);  $^{13}C$  NMR ( $CDCl_3$ , 100 MHz)  $\delta$ : 152.9, 149.8, 126.3, 124.2, 84.3, 29.9. GC-MS (EI) for  $C_{11}H_{13}ClOS$  (m/z): calcd. 228.04, found 228.02.

**(4-chlorophenyl)(1,2-dimethoxyethyl)sulfane (3z-i)**

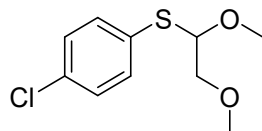

Pale oil, yield: 46%.  $^1H$  NMR ( $CDCl_3$ , 400 MHz):  $\delta$ : 7.42 (m, 2H), 7.27 (m, 2H), 4.72 (m, 1H), 3.56-3.49 (m, 5H), 3.36 (s, 3H);  $^{13}C$  NMR ( $CDCl_3$ , 100 MHz)  $\delta$ : 135.2, 134.2, 130.6, 129.0, 88.8, 74.5, 59.1, 56.3. GC-MS (EI) for  $C_{10}H_{13}ClO_2S$  (m/z): calcd. 232.03, found 232.06.

**(4-chlorophenyl)((2-methoxyethoxy)methyl)sulfane (3z-ii)**

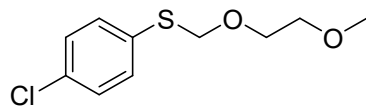

Pale oil, yield: 31%.  $^1H$  NMR ( $CDCl_3$ , 400 MHz):  $\delta$ : 7.41 (m, 2H), 7.25 (m, 2H), 5.03 (s, 2H), 3.79-3.76 (m, 2H), 3.59-3.55 (m, 2H), 3.38 (s, 3H);  $^{13}C$  NMR ( $CDCl_3$ , 100 MHz)  $\delta$ : 134.4, 132.8, 131.5, 129.0, 76.5, 71.5, 67.5, 59.0. GC-MS (EI) for  $C_{10}H_{13}ClO_2S$  (m/z): calcd. 232.03, found 232.06.

**2-((4-chlorophenyl)thio)-1,3-dioxolane (3aa-i) and 4-((4-chlorophenyl)thio)-1,3-dioxolane (3aa-ii) (3aa)**

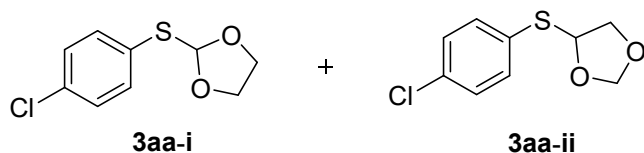

Pale oil, yield: 68% (**3aa-i** : **3aa-ii** = 2.7 : 1.0).  $^1\text{H}$  NMR ( $\text{CDCl}_3$ , 400 MHz):  $\delta$ : 7.69-7.67 (m, 2H), 7.52-7.50 (m, 3H), 1.56 (s, 9H);  $^{13}\text{C}$  NMR ( $\text{CDCl}_3$ , 100 MHz)  $\delta$ : 146.6, 131.5, 128.9, 124.9, 82.8, 29.9. GC-MS (EI) for  $\text{C}_9\text{H}_9\text{ClO}_2\text{S}$  (m/z): calcd. 216.00, found 216.00.

***tert*-butyl 4-nitrobenzenesulfinate (4a)**

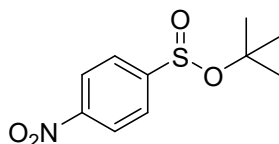

Yellow solid, yield: 75%.  $^1\text{H}$  NMR ( $\text{CDCl}_3$ , 400 MHz):  $\delta$ : 8.36 (m, 2H), 7.86 (m, 2H), 1.58 (s, 9H);  $^{13}\text{C}$  NMR ( $\text{CDCl}_3$ , 100 MHz)  $\delta$ : 152.9, 149.8, 126.3, 124.2, 84.3, 29.9.

***tert*-butyl benzenesulfinate (4b)**

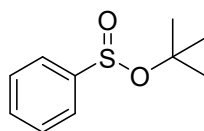

White oil, yield: 78%.  $^1\text{H}$  NMR ( $\text{CDCl}_3$ , 400 MHz):  $\delta$ : 7.69-7.67 (m, 2H), 7.52-7.50 (m, 3H), 1.56 (s, 9H);  $^{13}\text{C}$  NMR ( $\text{CDCl}_3$ , 100 MHz)  $\delta$ : 146.6, 131.5, 128.9, 124.9, 82.8, 29.9.

***tert*-butyl 4-chlorobenzenesulfinate (4c)**

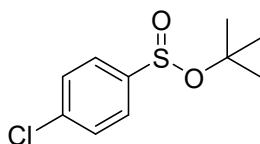

White oil, yield: 81%.  $^1\text{H}$  NMR ( $\text{CDCl}_3$ , 400 MHz):  $\delta$ : 7.62-7.60 (m, 2H), 7.50-7.48 (m, 2H), 1.55 (s, 9H);  $^{13}\text{C}$  NMR ( $\text{CDCl}_3$ , 100 MHz)  $\delta$ : 145.2, 137.9, 129.2, 126.4, 83.3, 29.9.

## 7. $^1\text{H}$ NMR, $^{13}\text{C}$ NMR and HRMS/MS copies of compounds 3a-aa and 4a-c

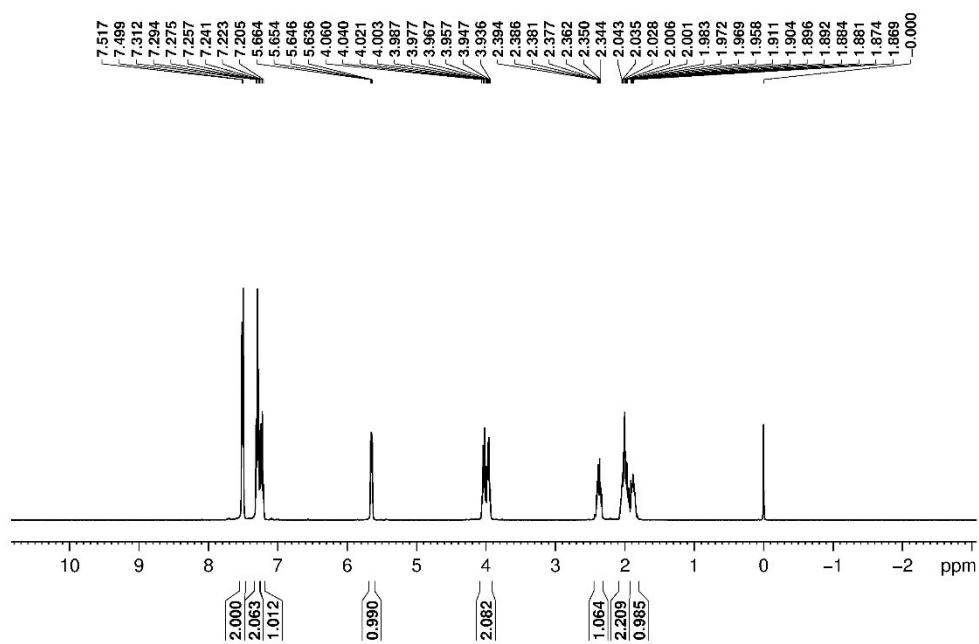

$^1\text{H}$  NMR spectrum of compound **3a**

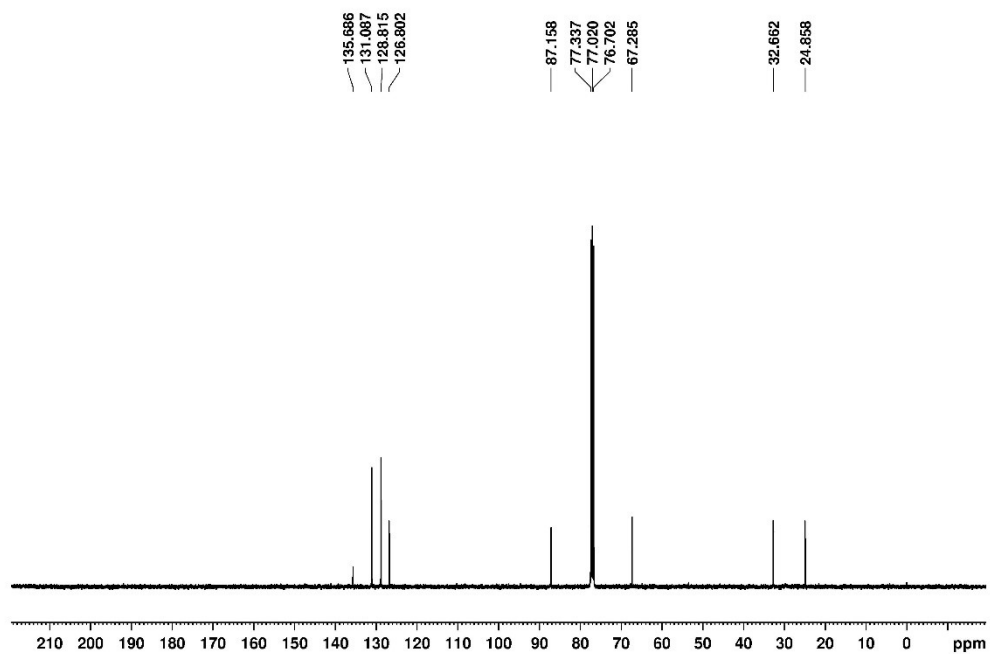

$^{13}\text{C}$  NMR spectrum of compound **3a**

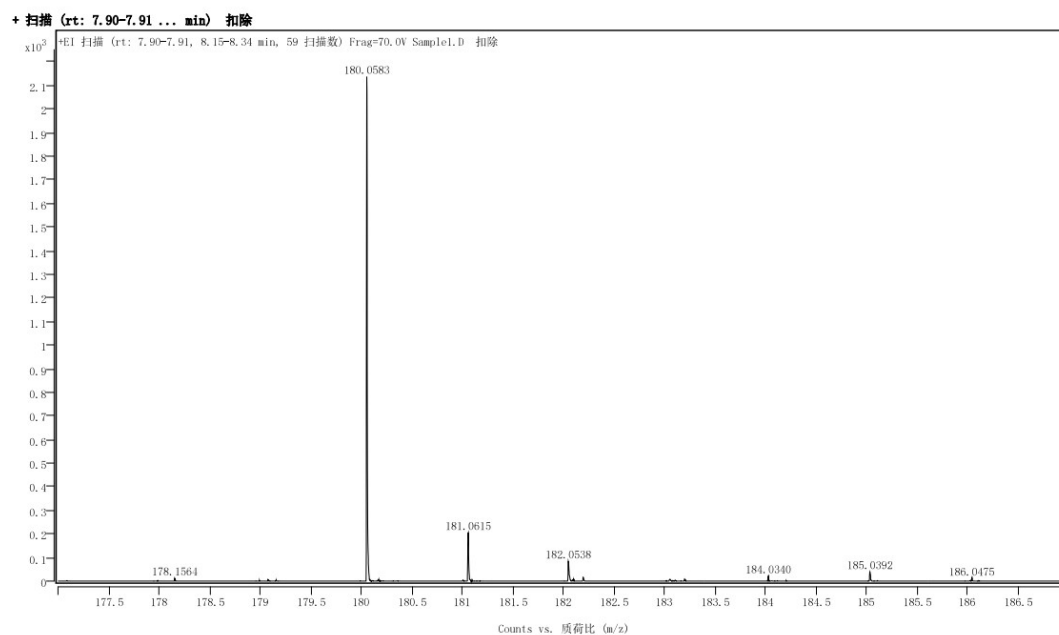

HRMS spectrum of compound **3a**

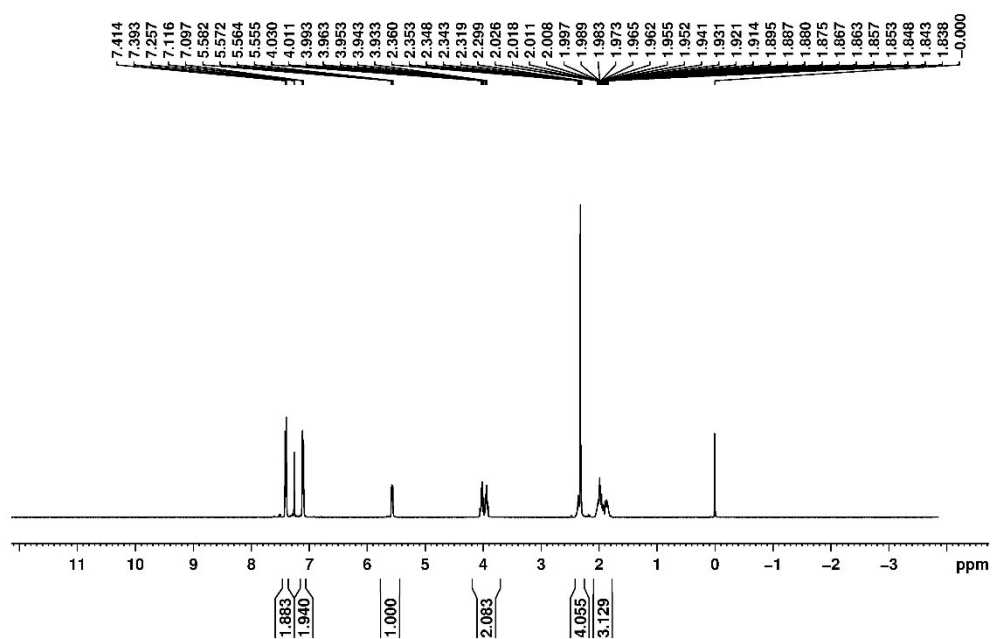

<sup>1</sup>H NMR spectrum of compound **3b**

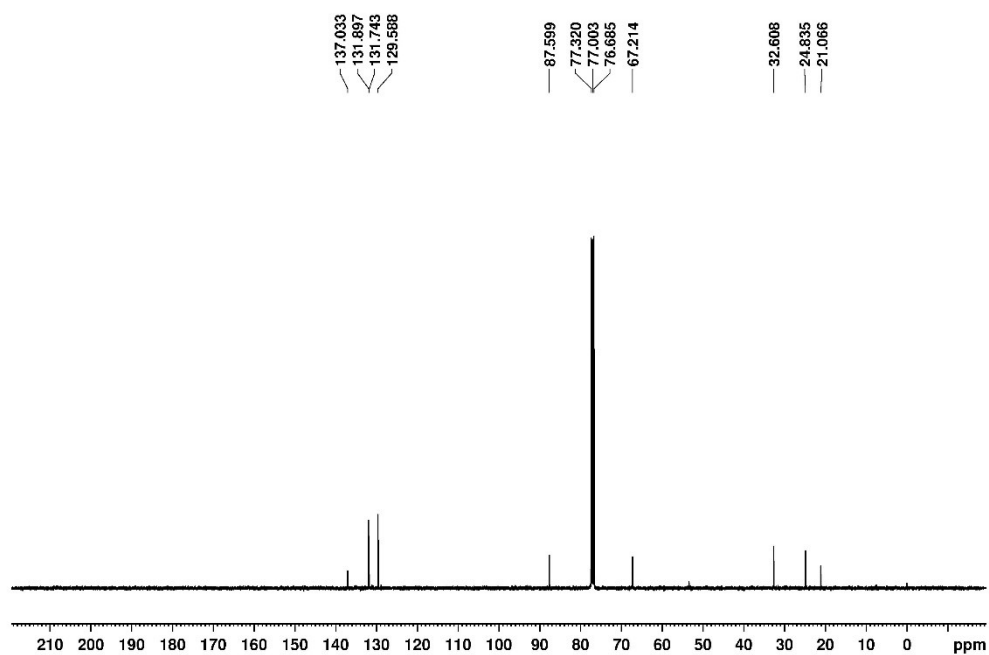

$^{13}\text{C}$  NMR spectrum of compound **3b**

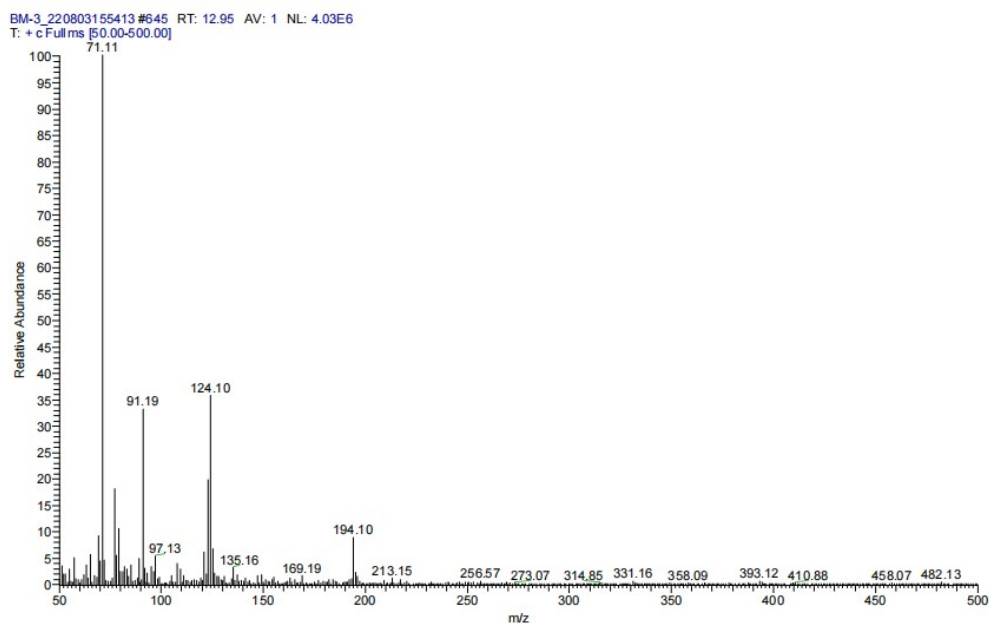

MS spectrum of compound **3b**

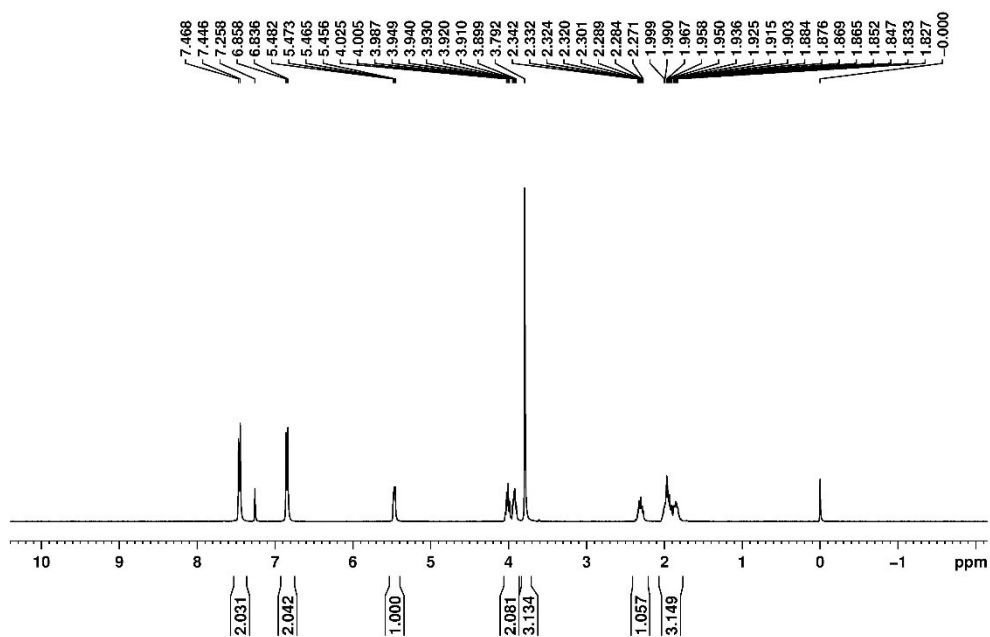

<sup>1</sup>H NMR spectrum of compound **3c**

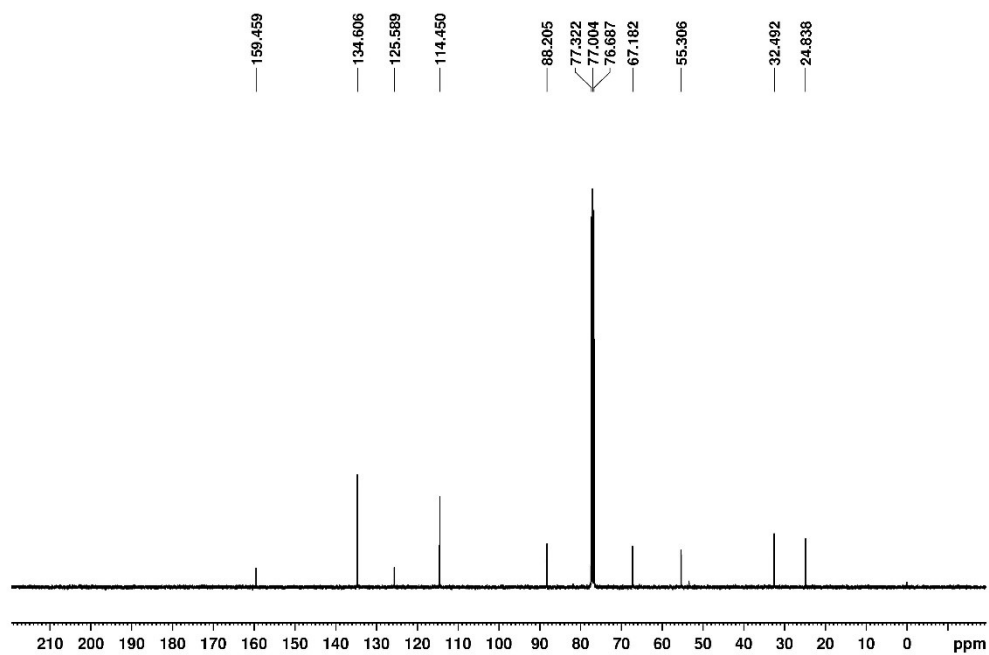

<sup>13</sup>C NMR spectrum of compound **3c**

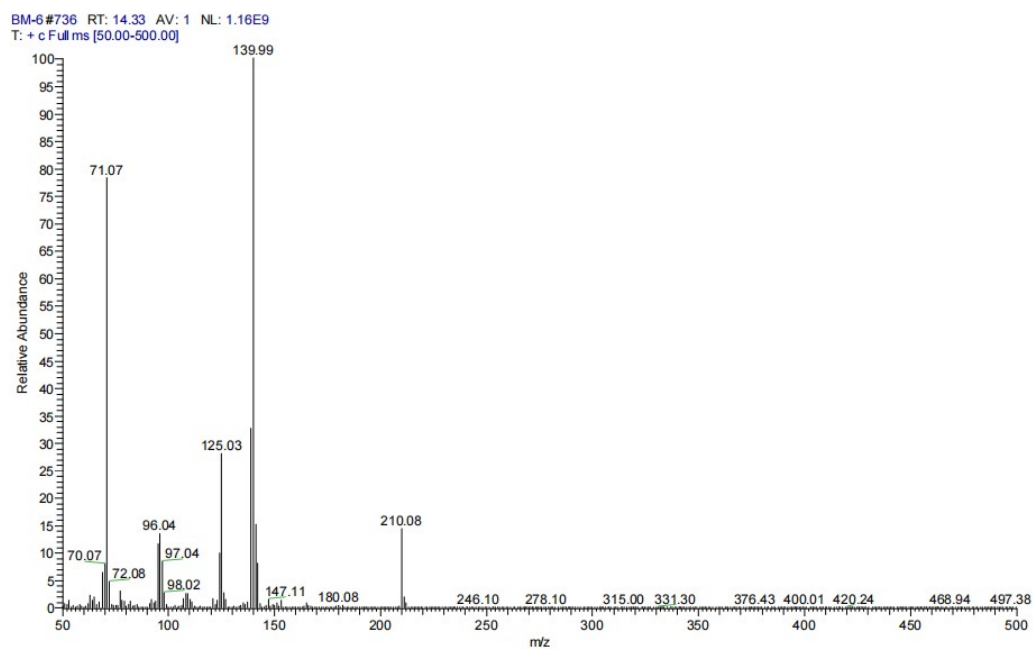

MS spectrum of compound **3c**

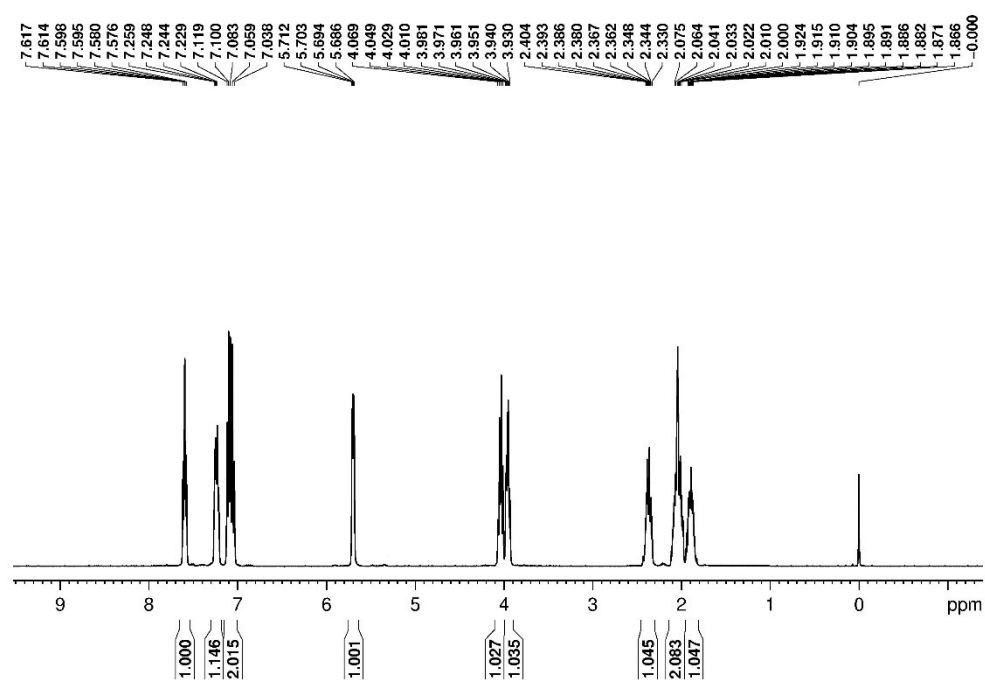

$^1\text{H}$  NMR spectrum of compound **3d**

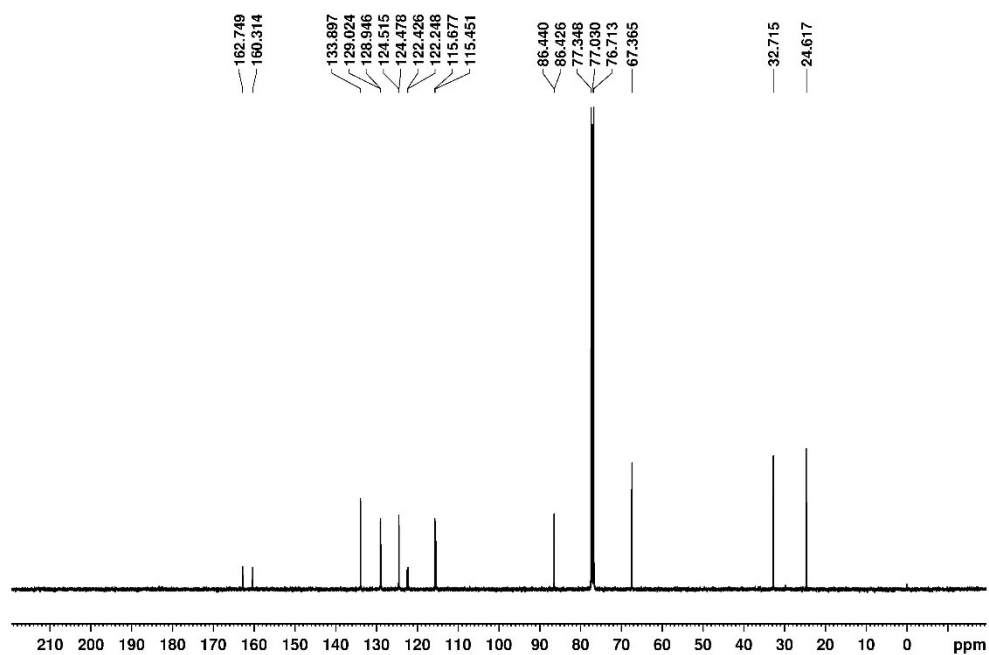

<sup>13</sup>C NMR spectrum of compound **3d**

BM-2 220729145131 #599 RT: 12.20 AV: 1 NL: 1.14E9  
T: + c Full ms [50.00-500.00]

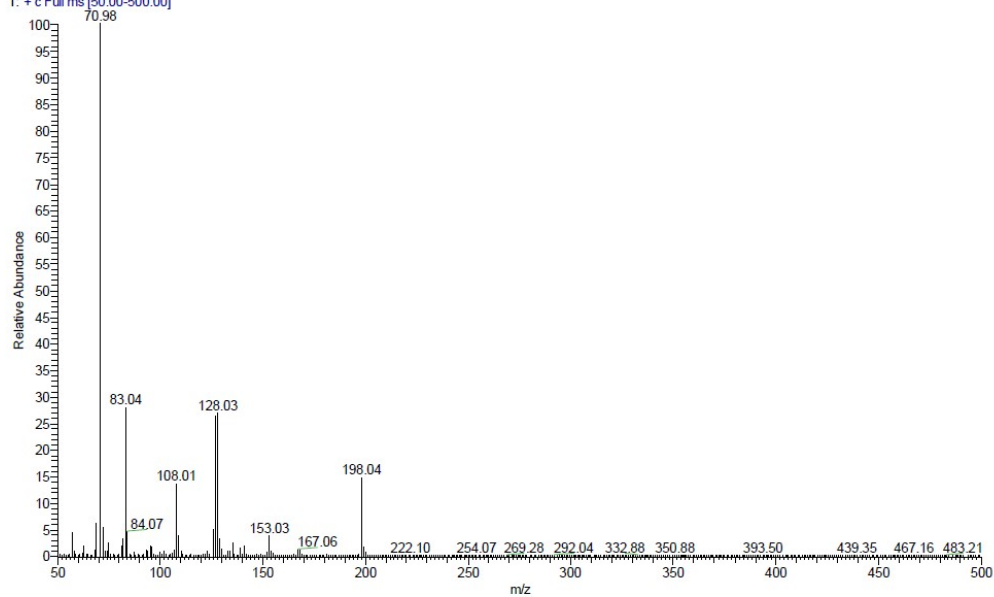

MS spectrum of compound **3d**

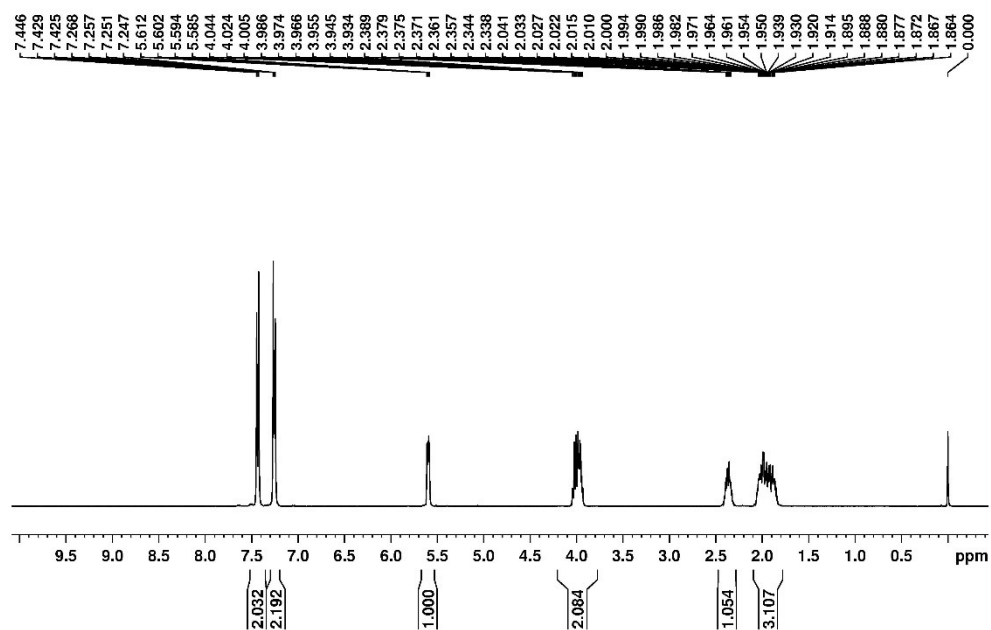

$^1\text{H}$  NMR spectrum of compound **3e**

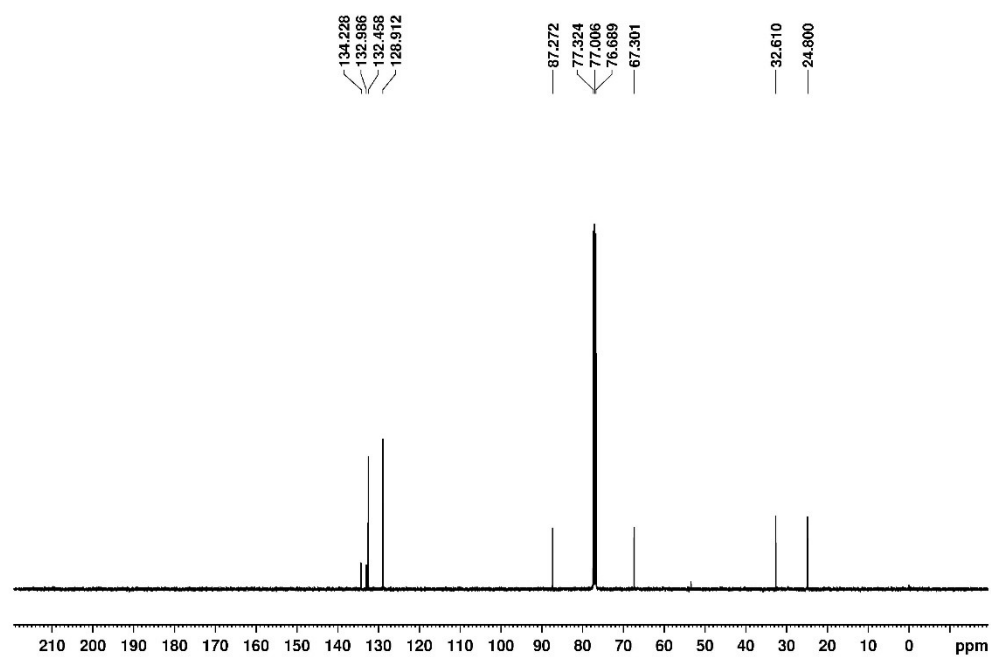

$^{13}\text{C}$  NMR spectrum of compound **3e**

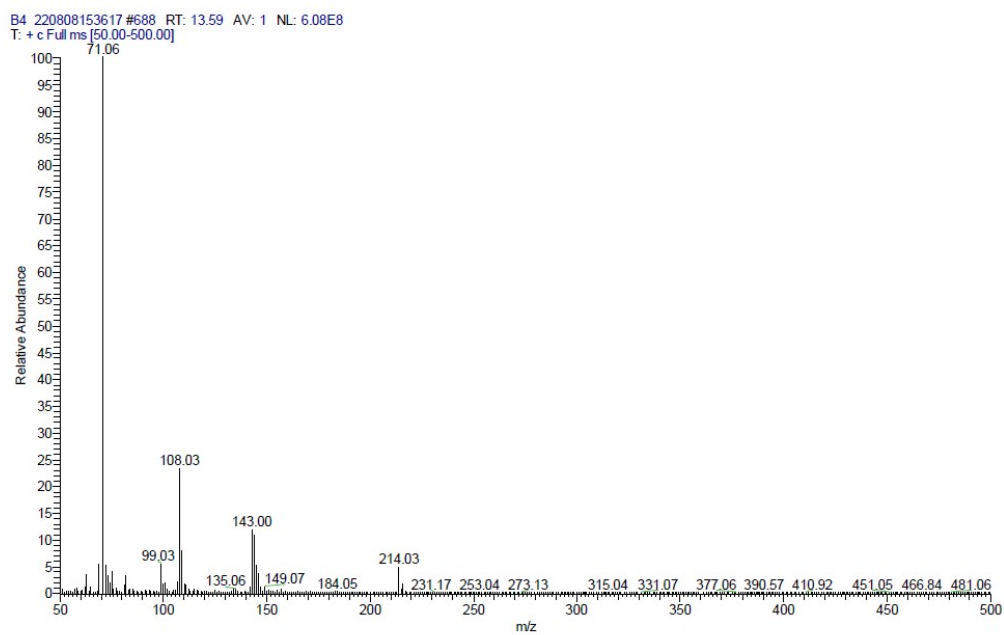

MS spectrum of compound **3e**

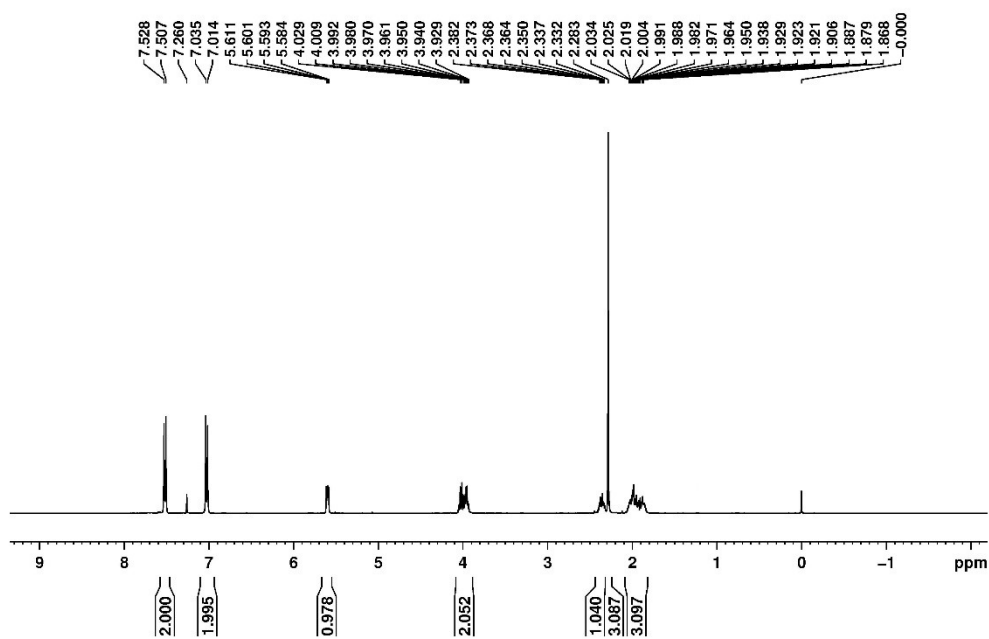

<sup>1</sup>H NMR spectrum of compound **3f**

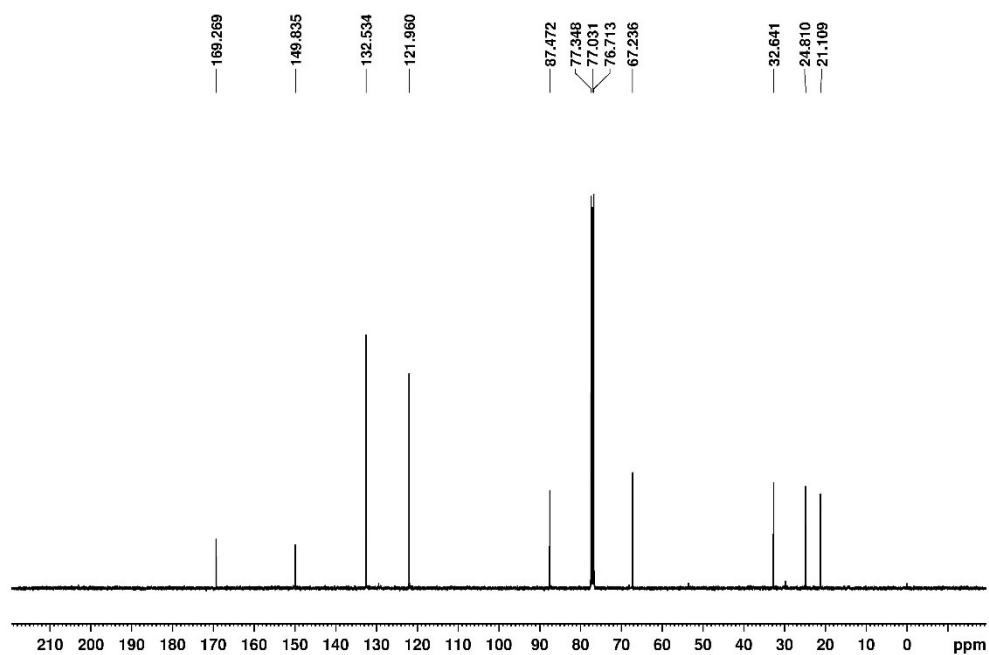

$^{13}\text{C}$  NMR spectrum of compound **3f**

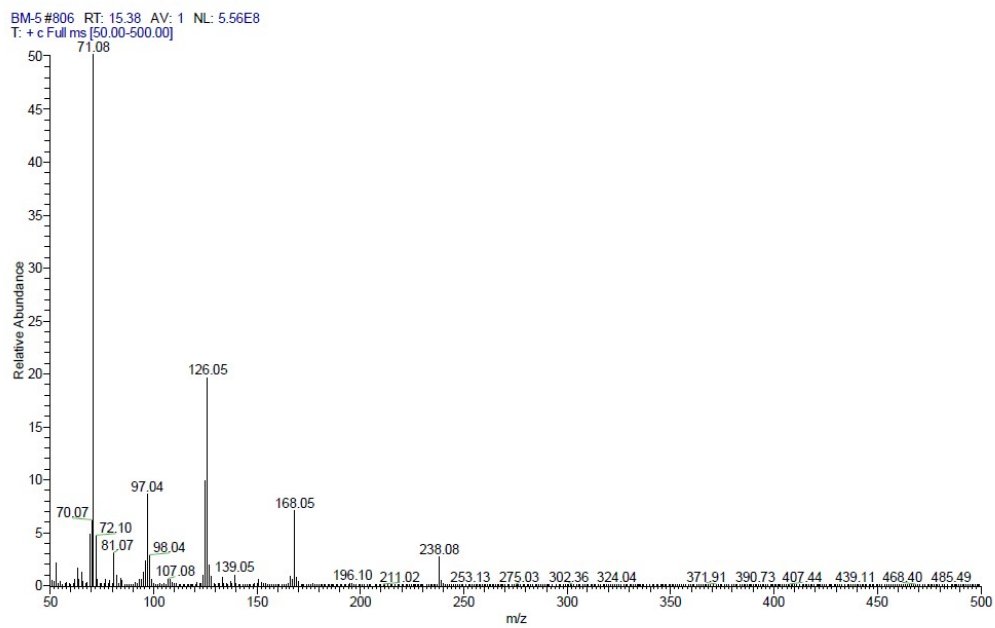

MS spectrum of compound **3f**

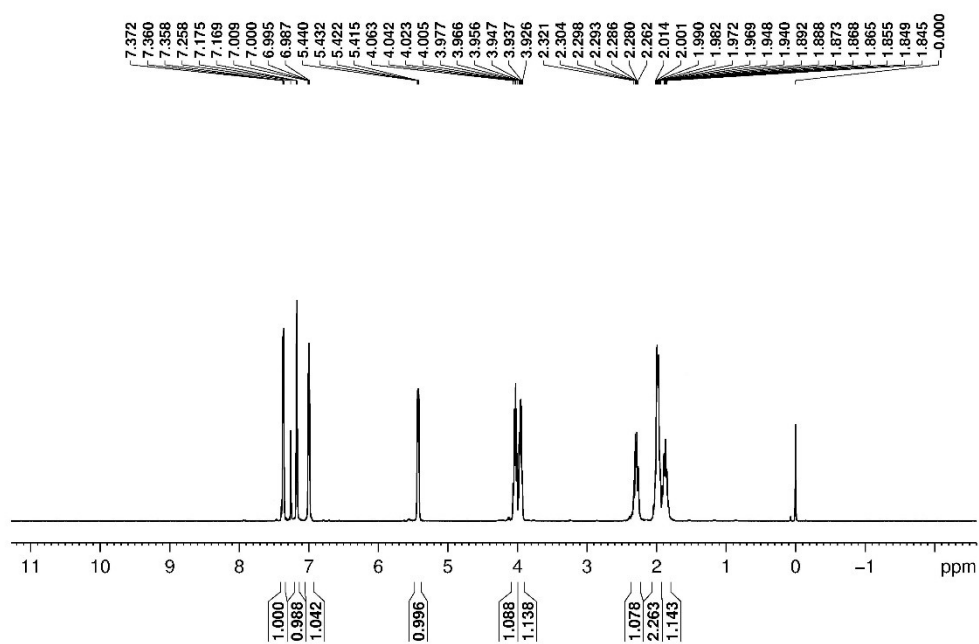

<sup>1</sup>H NMR spectrum of compound **3g**

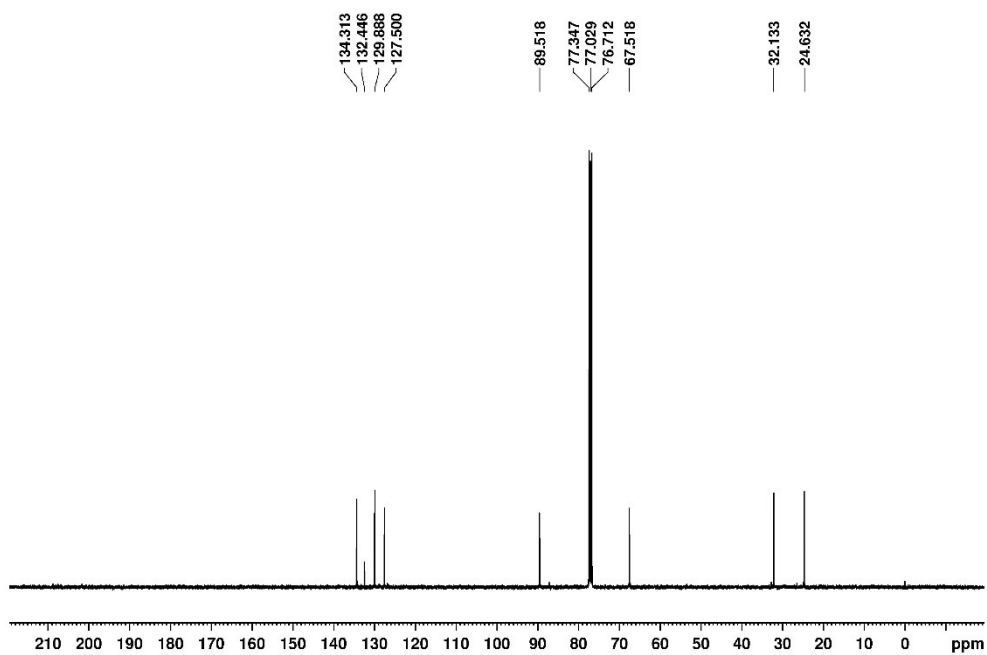

<sup>13</sup>C NMR spectrum of compound **3g**

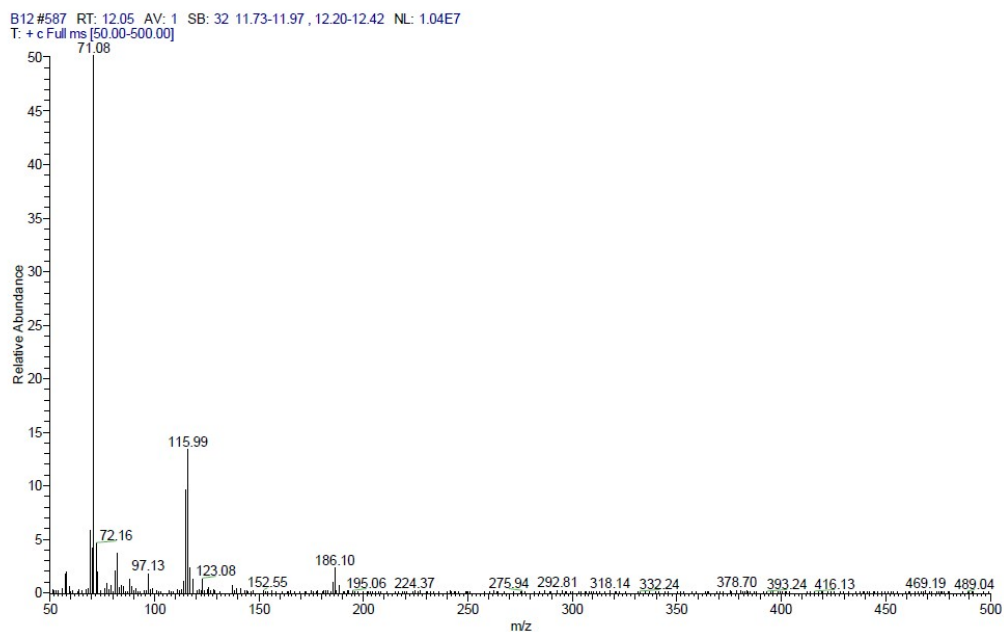

MS spectrum of compound **3g**

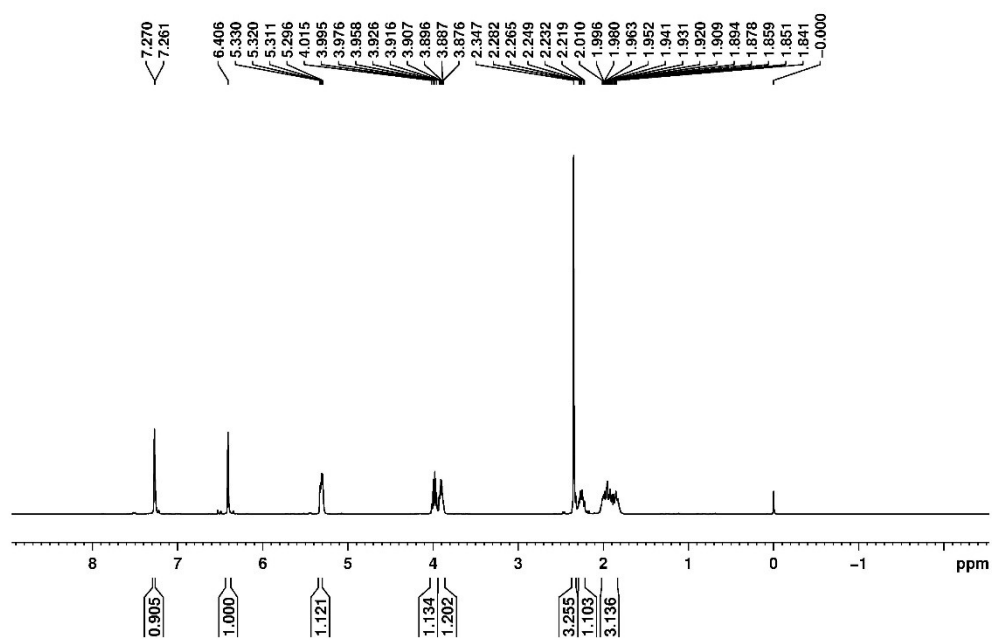

$^1\text{H}$  NMR spectrum of compound **3h**

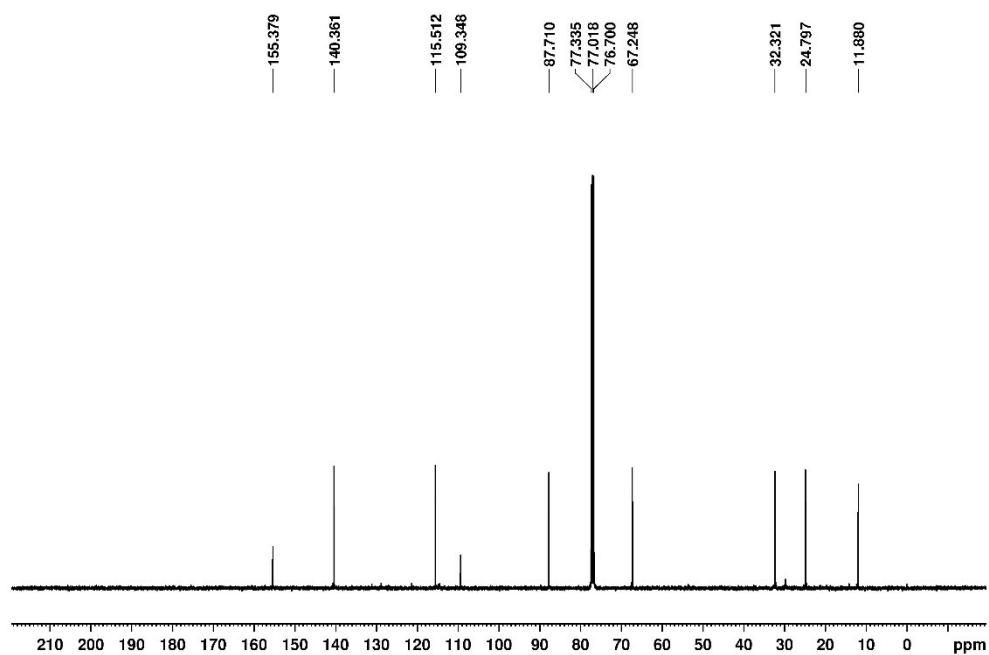

$^{13}\text{C}$  NMR spectrum of compound **3h**

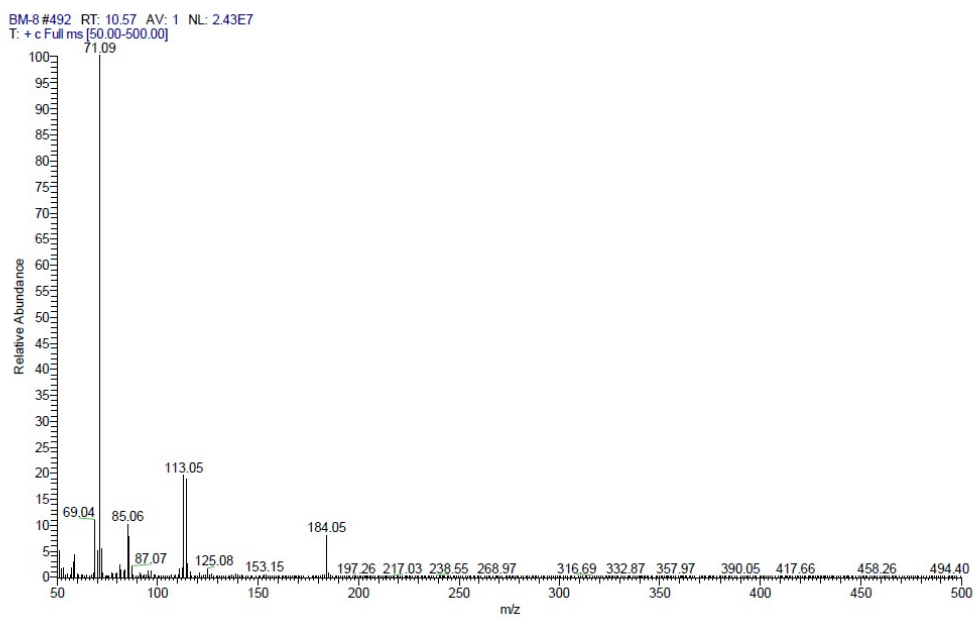

MS spectrum of compound **3h**

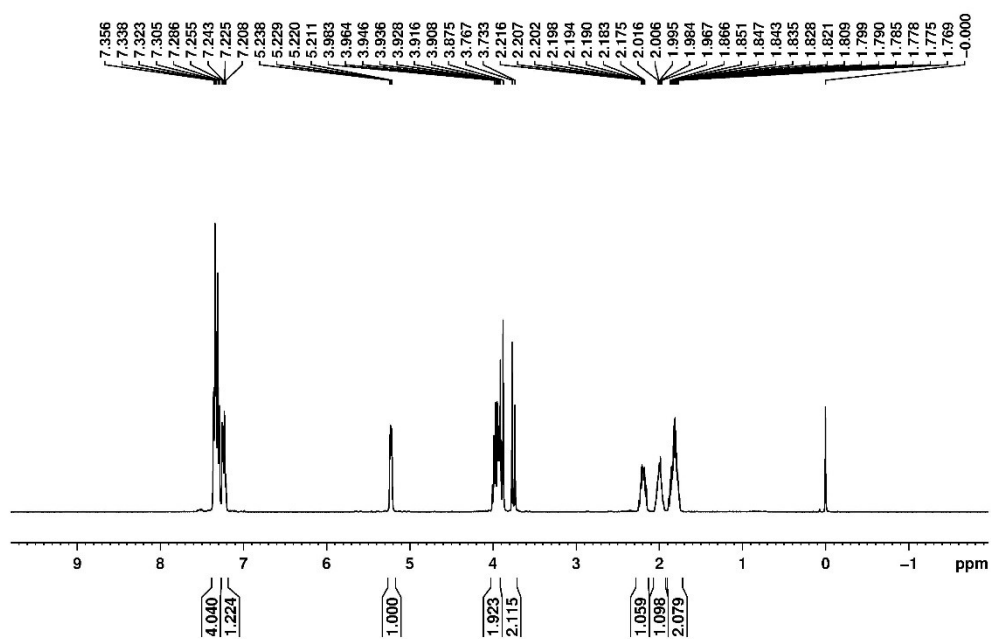

<sup>1</sup>H NMR spectrum of compound **3i**

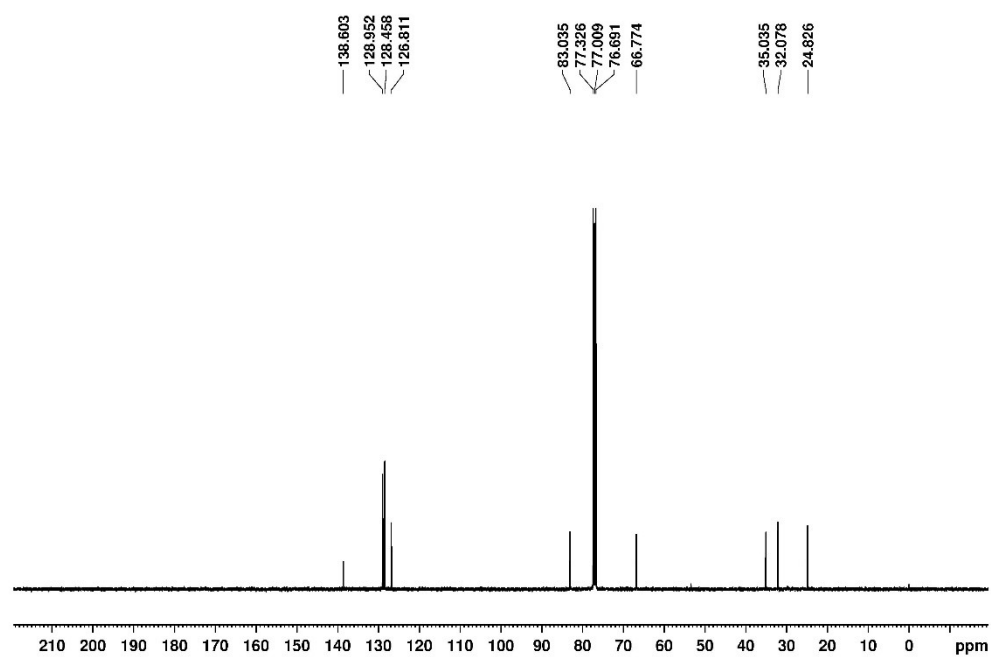

<sup>13</sup>C NMR spectrum of compound **3i**

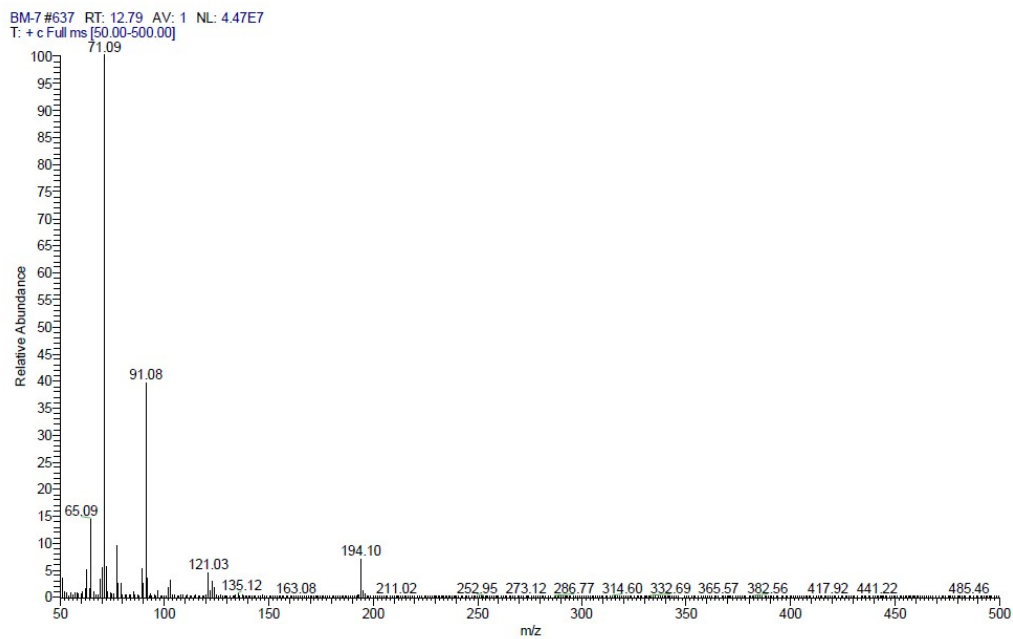

MS spectrum of compound **3i**

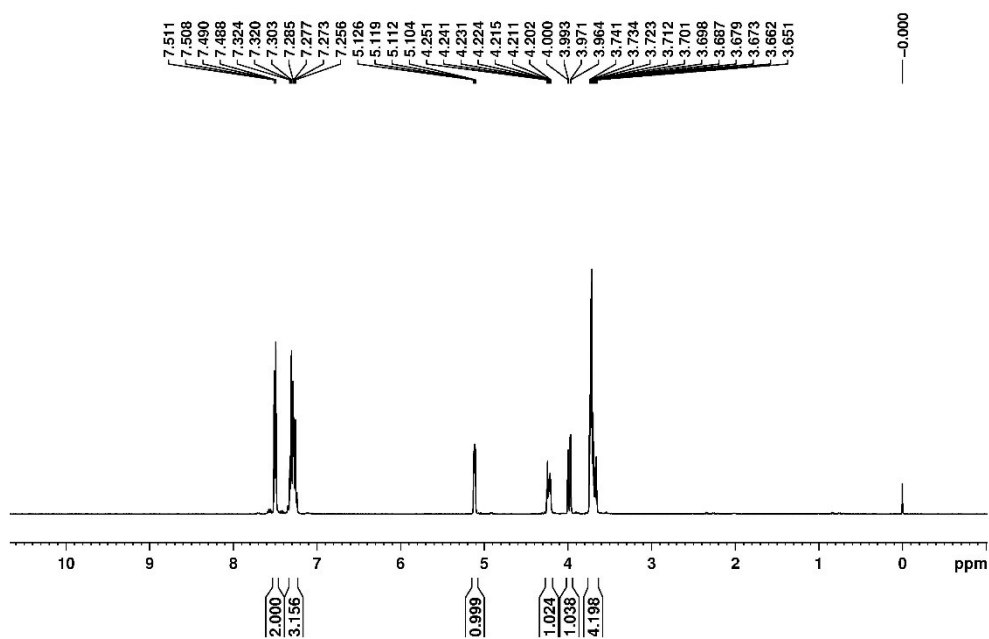

$^1\text{H}$  NMR spectrum of compound **3i**

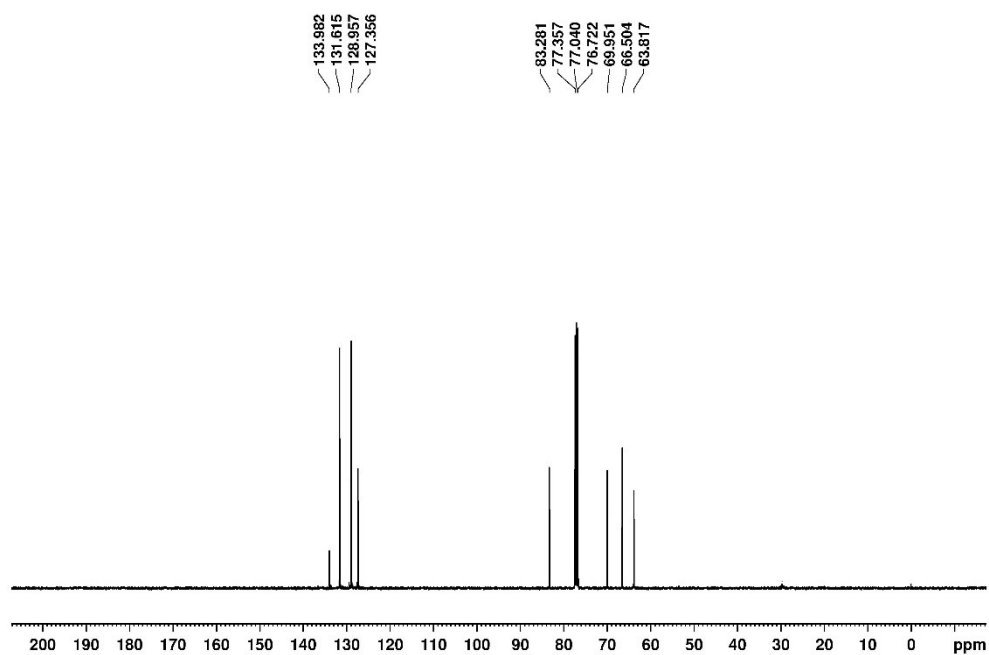

<sup>13</sup>C NMR spectrum of compound **3I**

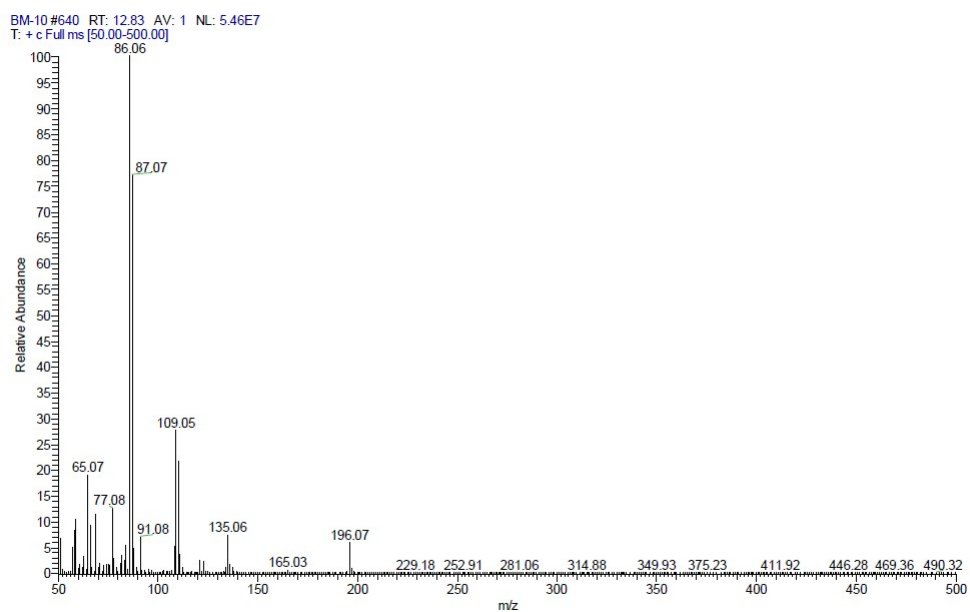

MS spectrum of compound **3I**

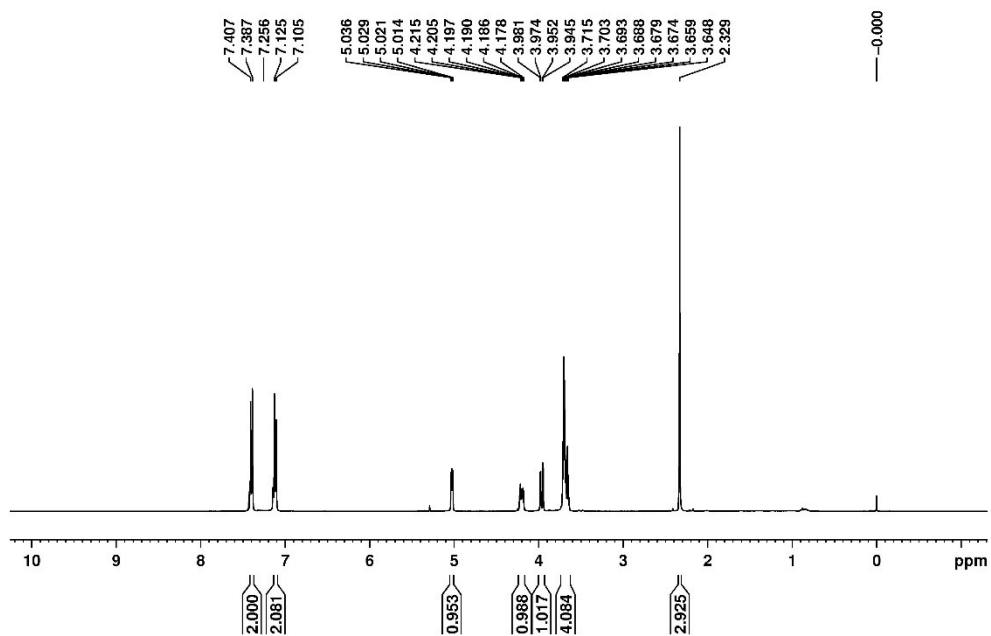

<sup>1</sup>H NMR spectrum of compound **3m**

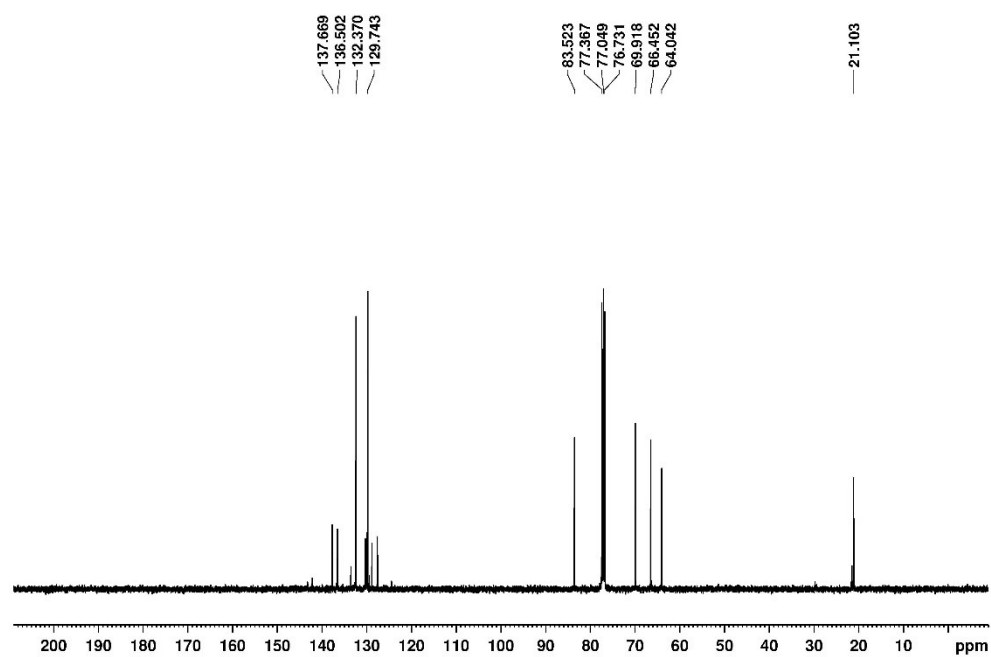

<sup>13</sup>C NMR spectrum of compound **3m**

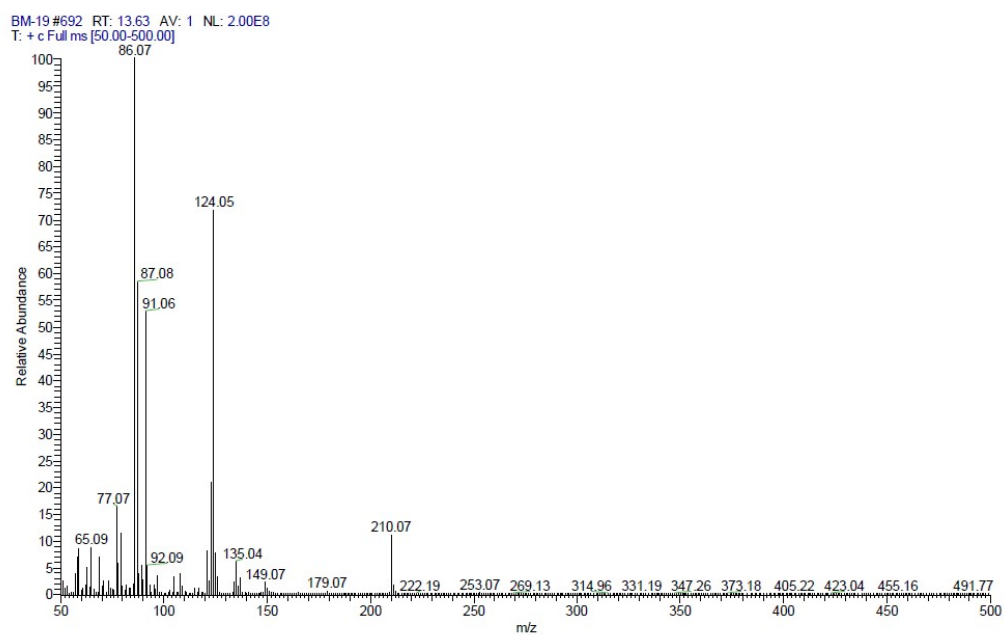

MS spectrum of compound **3m**

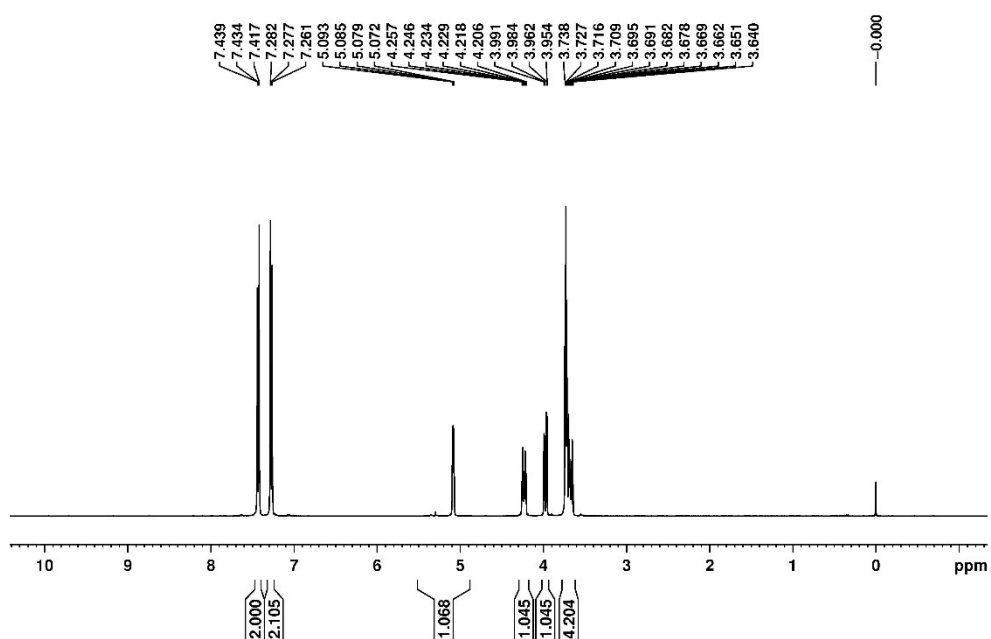

$^1\text{H}$  NMR spectrum of compound **3n**

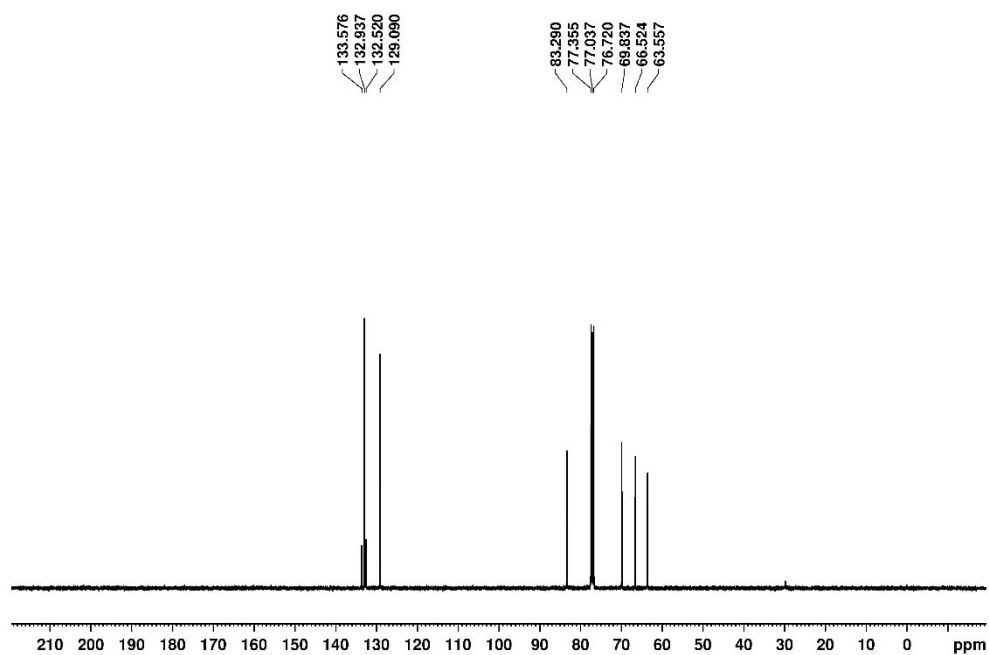

<sup>13</sup>C NMR spectrum of compound **3n**

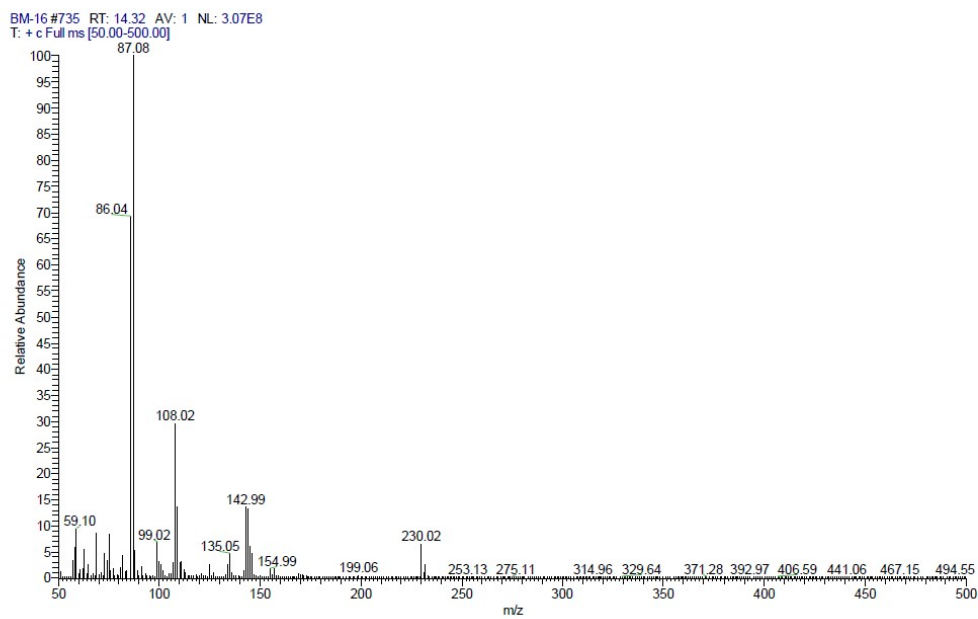

MS spectrum of compound **3n**

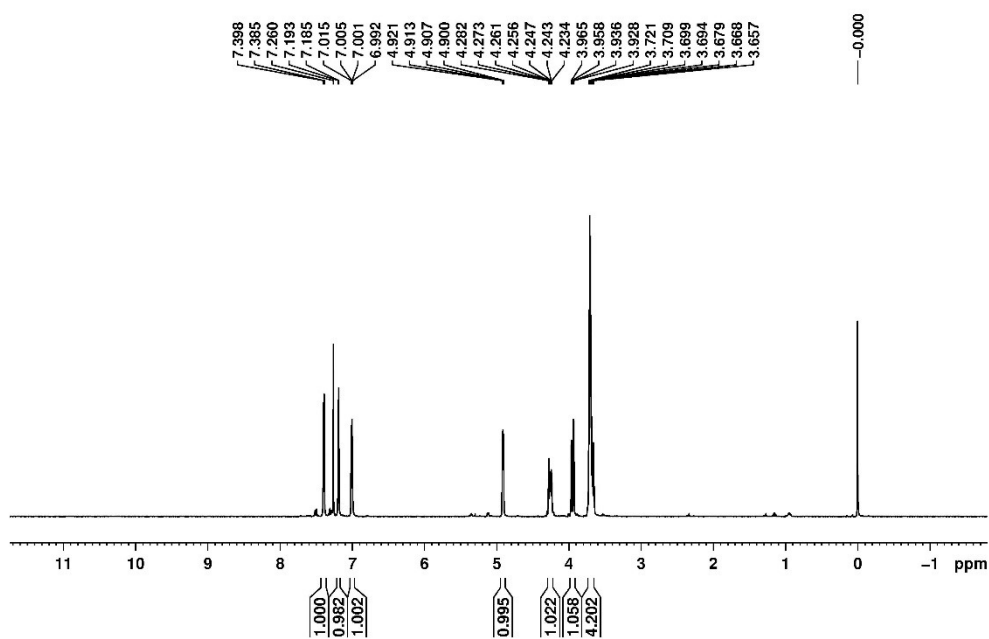

<sup>1</sup>H NMR spectrum of compound **3o**

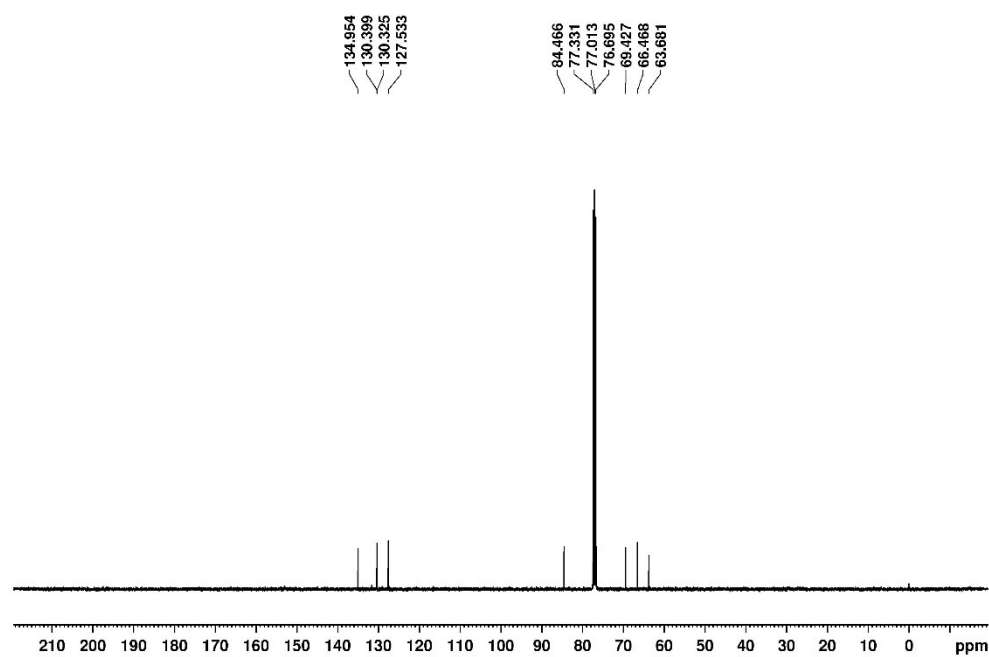

<sup>13</sup>C NMR spectrum of compound **3o**

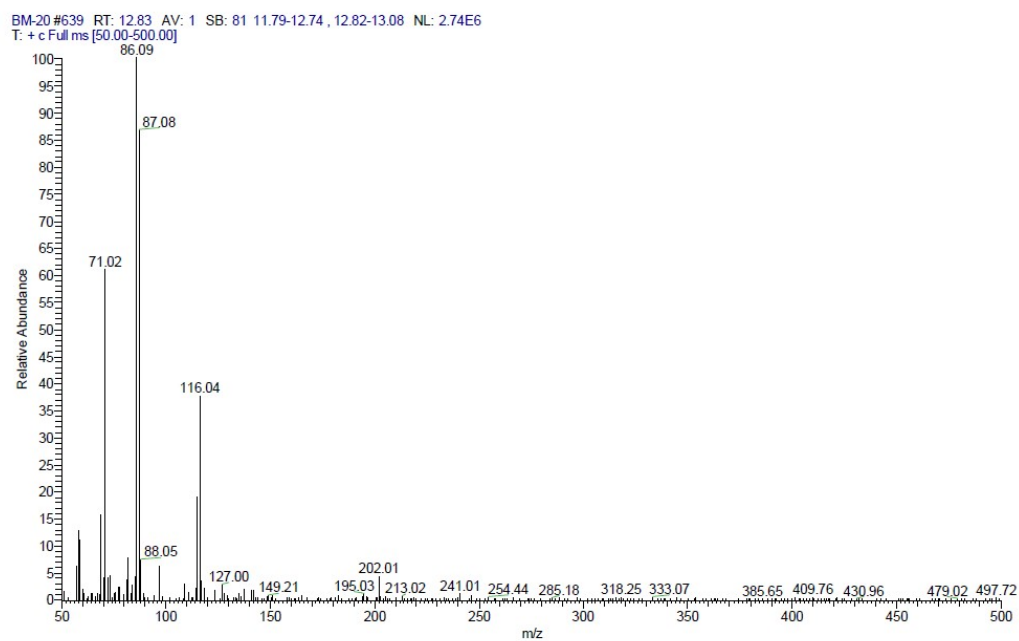

MS spectrum of compound **3o**

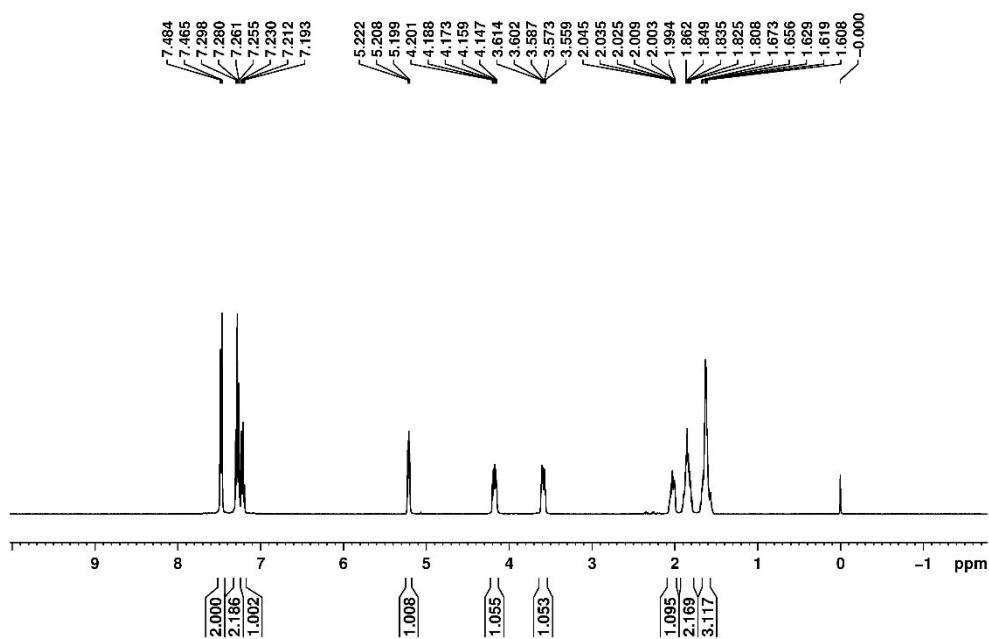

$^1\text{H}$  NMR spectrum of compound **3p**

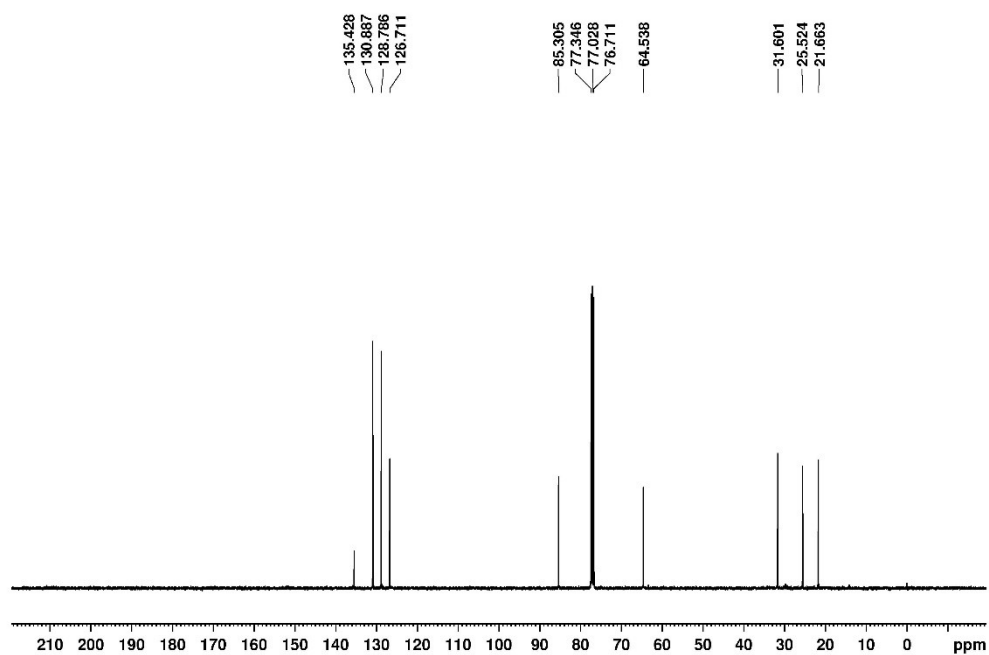

<sup>13</sup>C NMR spectrum of compound **3p**

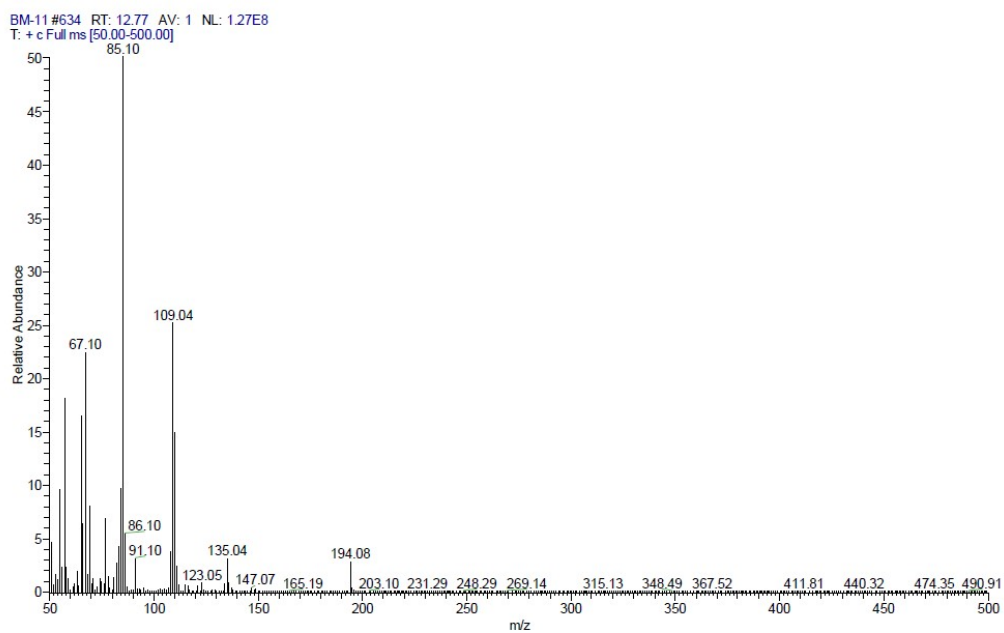

MS spectrum of compound **3p**

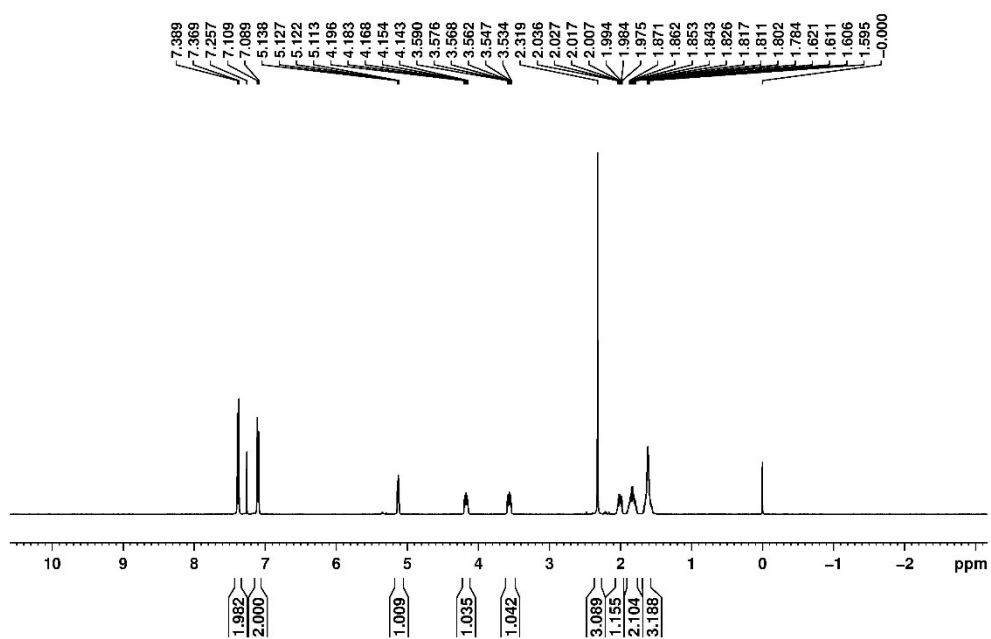

<sup>1</sup>H NMR spectrum of compound **3q**

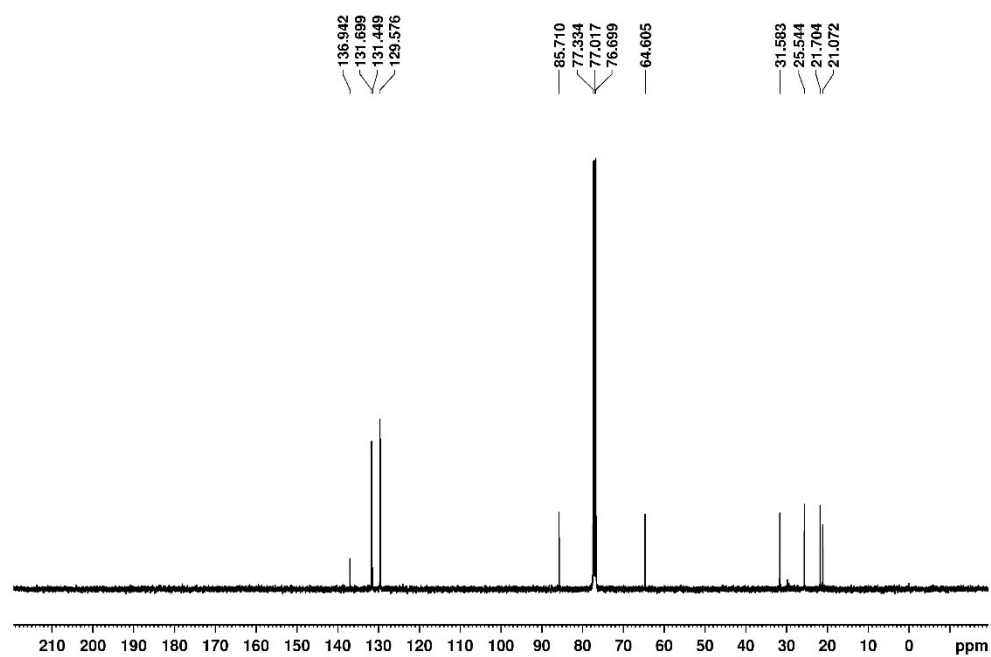

<sup>13</sup>C NMR spectrum of compound **3q**

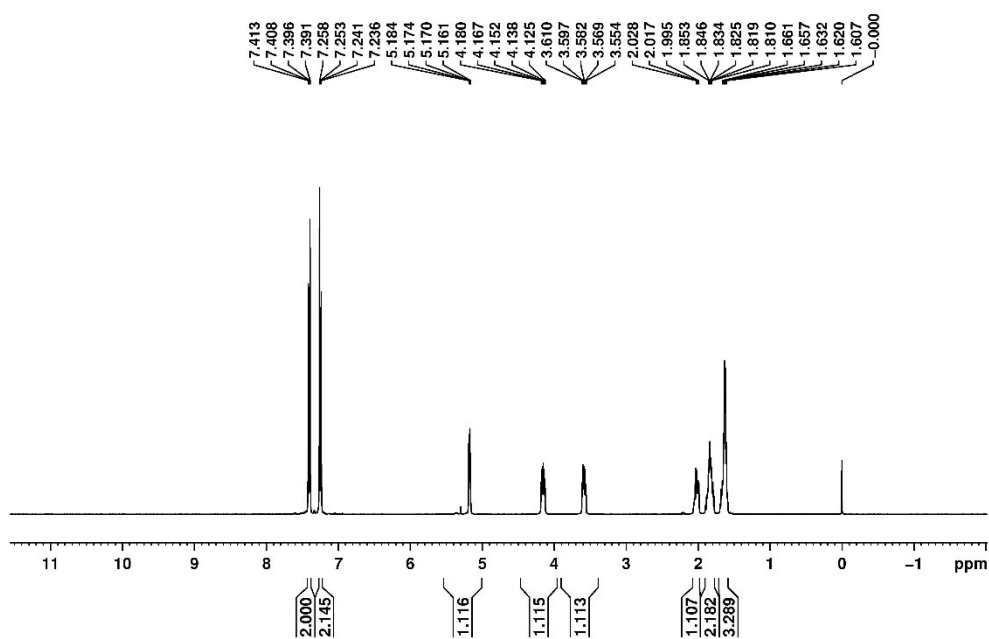

<sup>1</sup>H NMR spectrum of compound **3r**

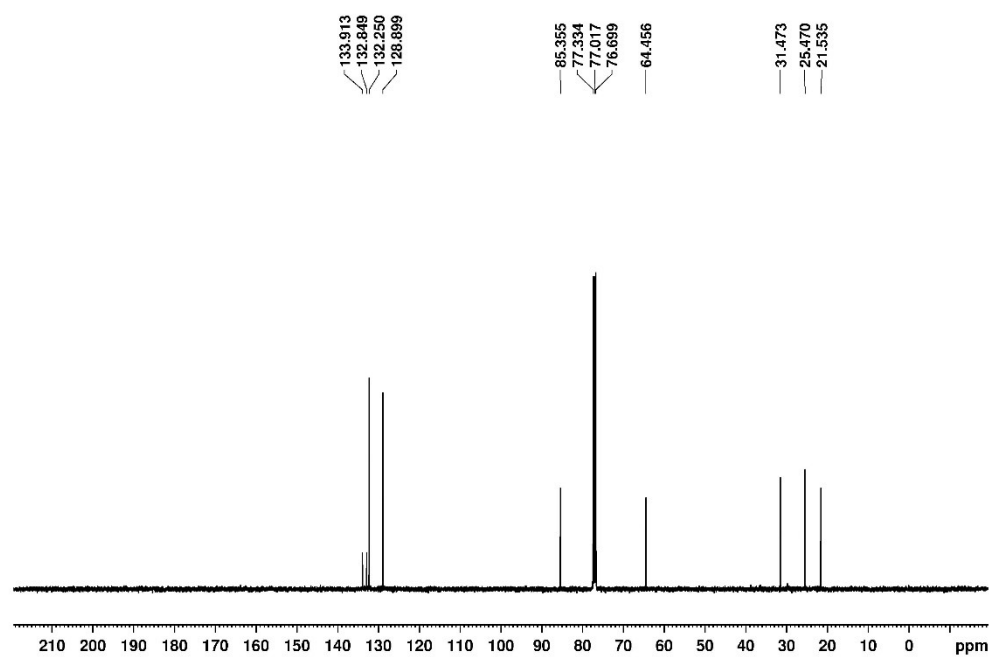

<sup>13</sup>C NMR spectrum of compound **3r**

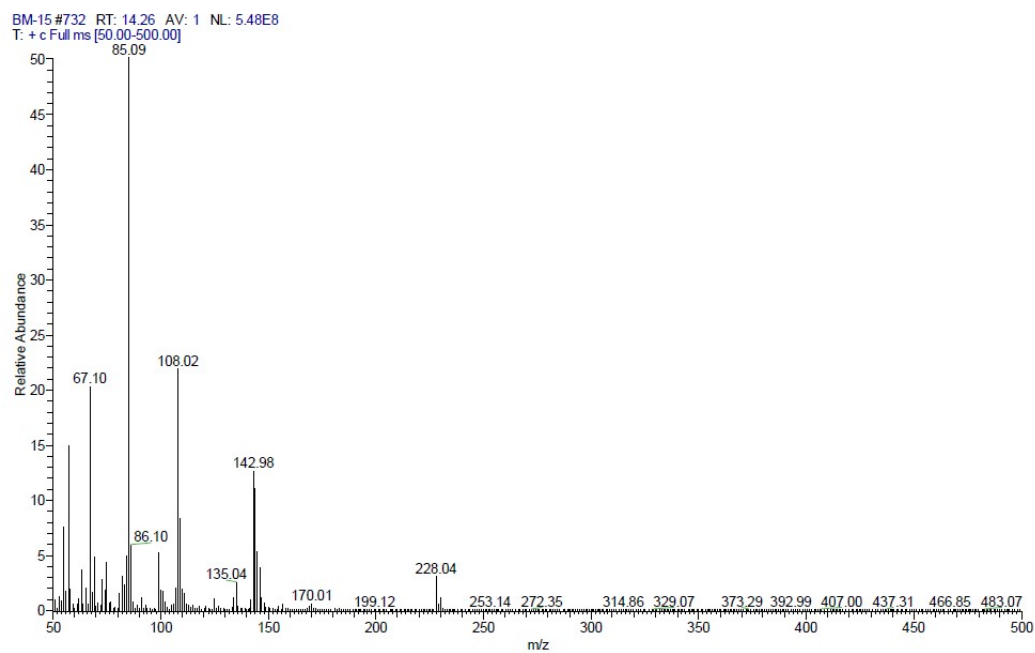

MS spectrum of compound **3r**

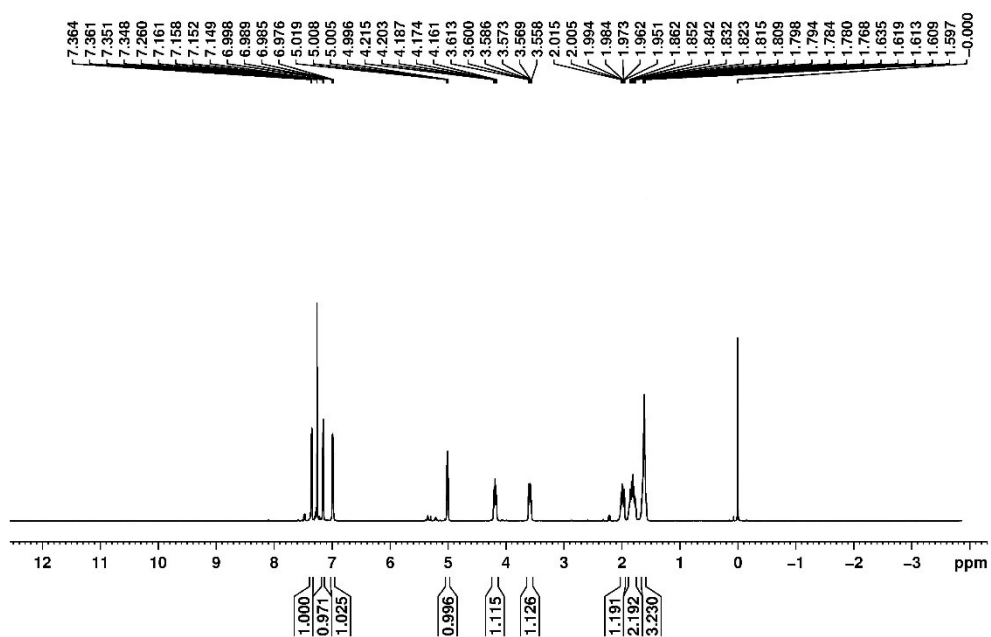

$^1\text{H}$  NMR spectrum of compound **3s**

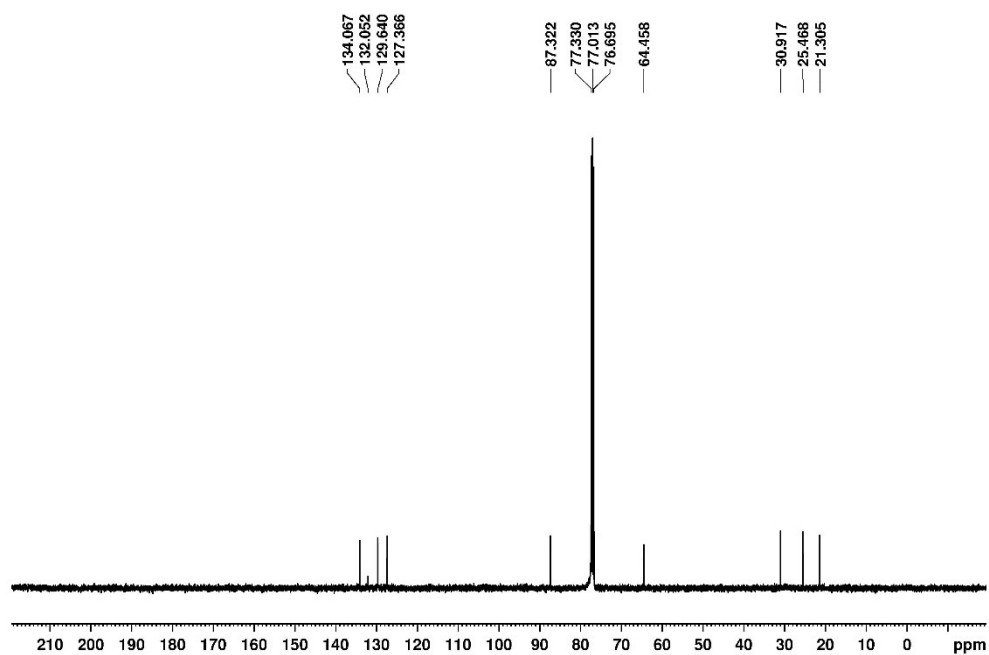

<sup>13</sup>C NMR spectrum of compound **3s**

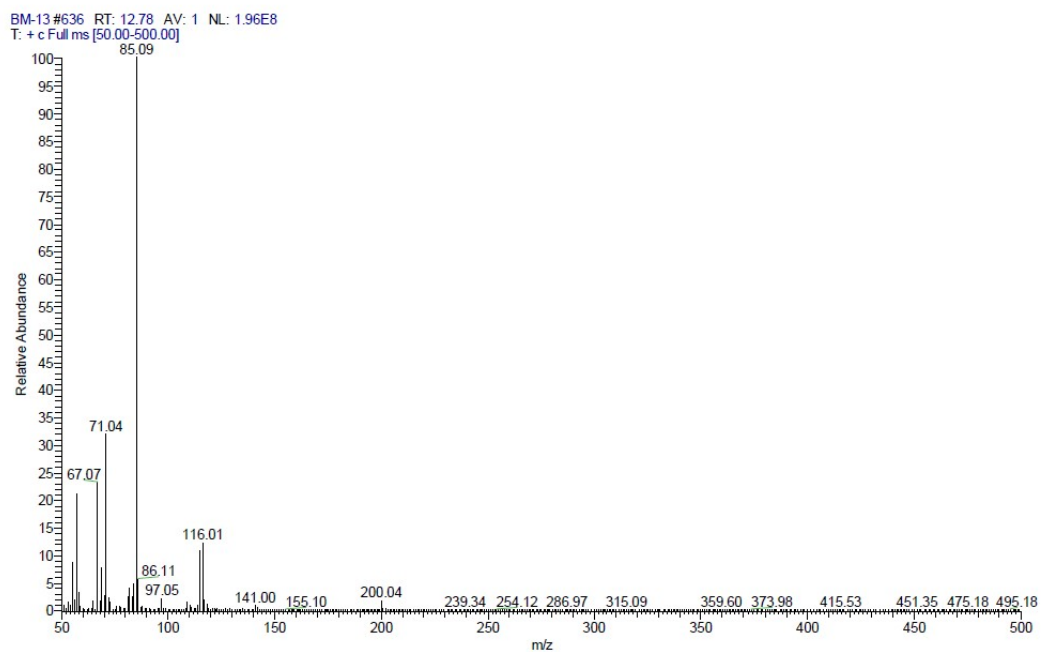

MS spectrum of compound **3s**

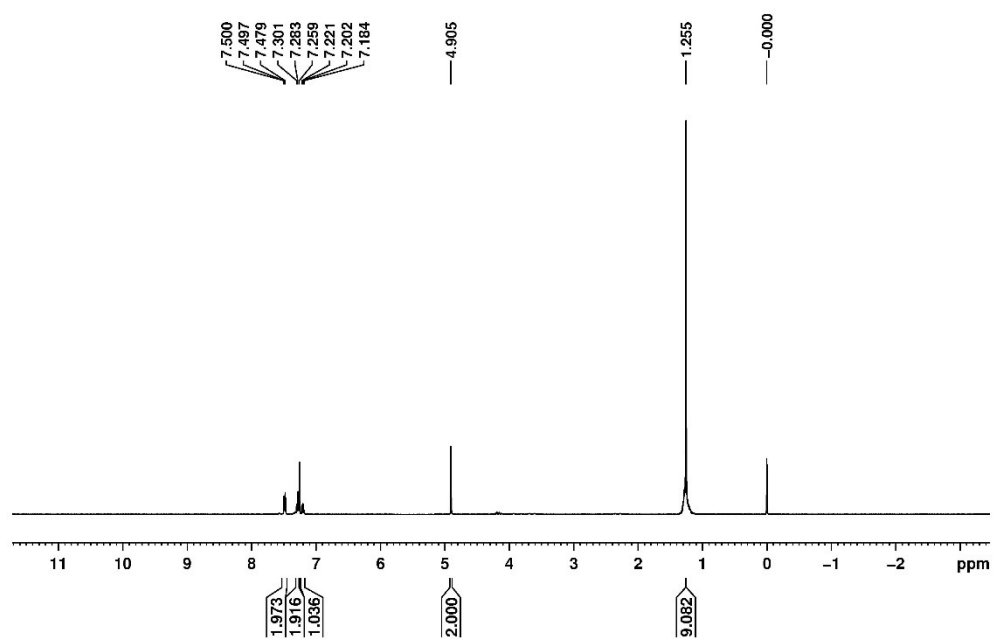

$^1\text{H}$  NMR spectrum of compound **3t**

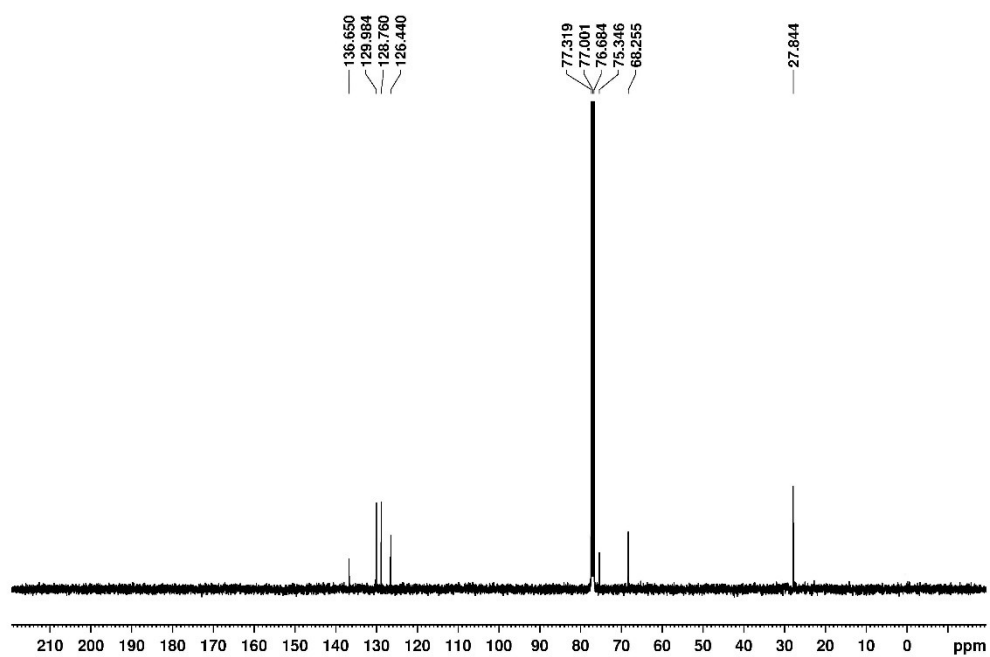

$^{13}\text{C}$  NMR spectrum of compound **3t**

BM-9#503 RT: 10.75 AV: 1 NL: 7.49E6  
T: +c Full ms [50.00-500.00]

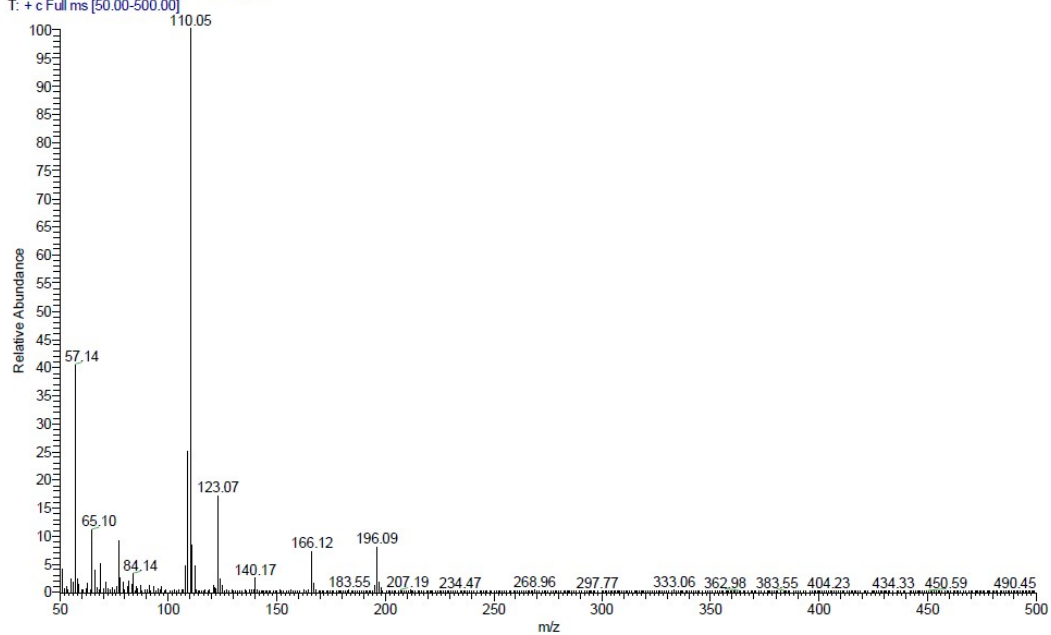

MS spectrum of compound **3t**

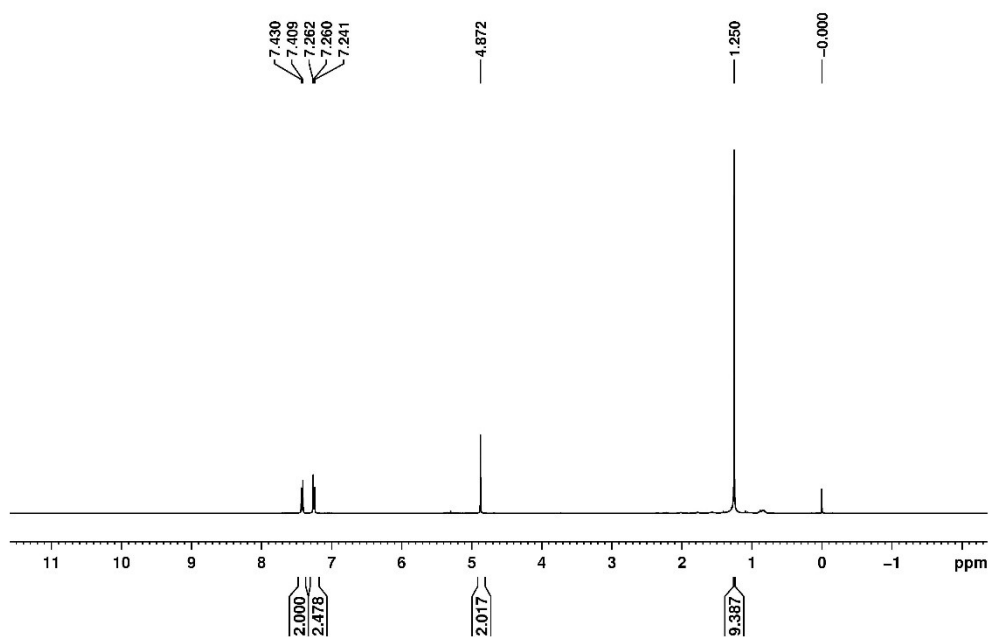

$^1\text{H}$  NMR spectrum of compound **3u**

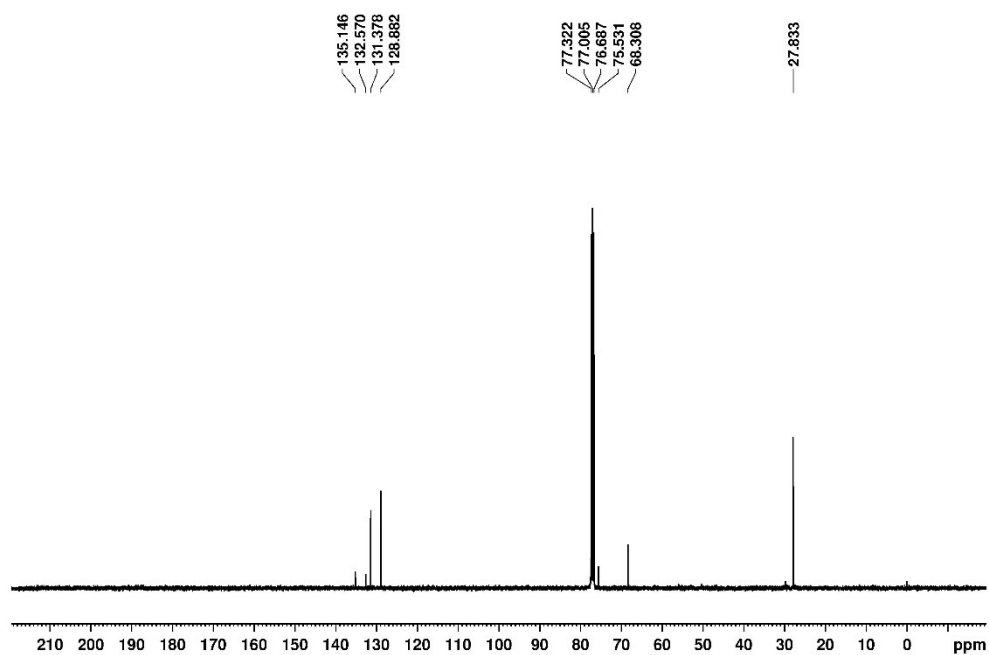

<sup>13</sup>C NMR spectrum of compound **3u**

BM-23 #605 RT: 12.30 AV: 1 SB: 28 12.02-12.22, 12.33-12.53 NL: 5.61E6  
T: + c Full ms [50.00-500.00]

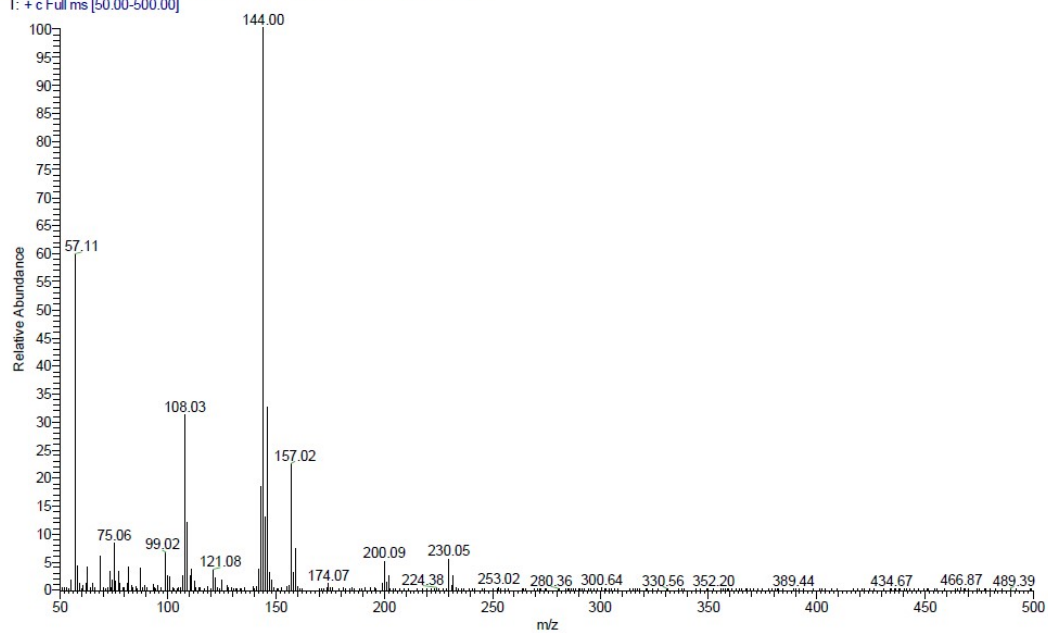

MS spectrum of compound **3u**

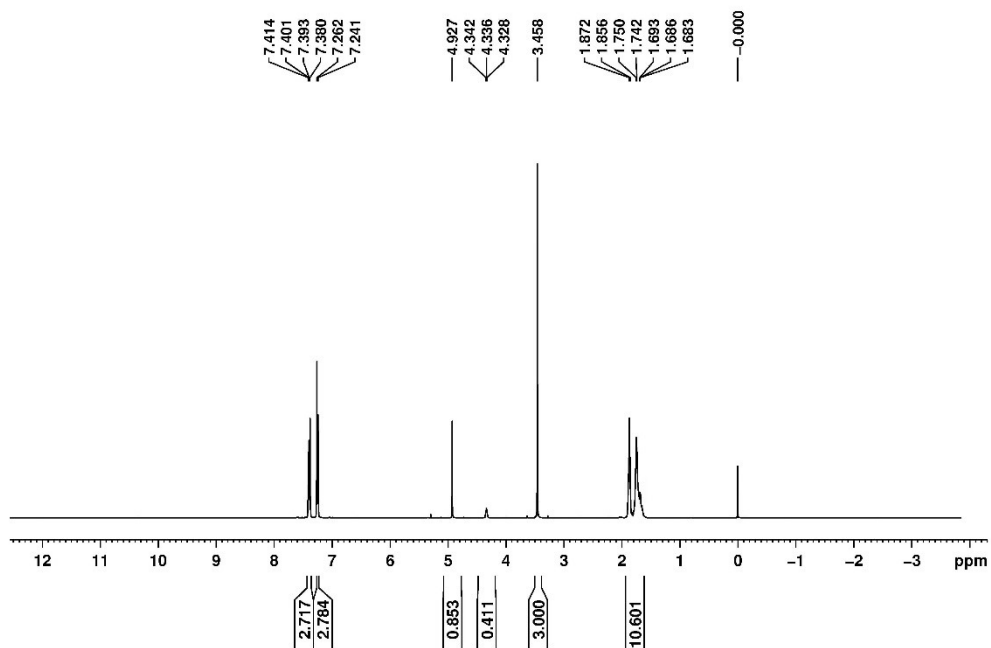

<sup>1</sup>H NMR spectrum of compound **3x**

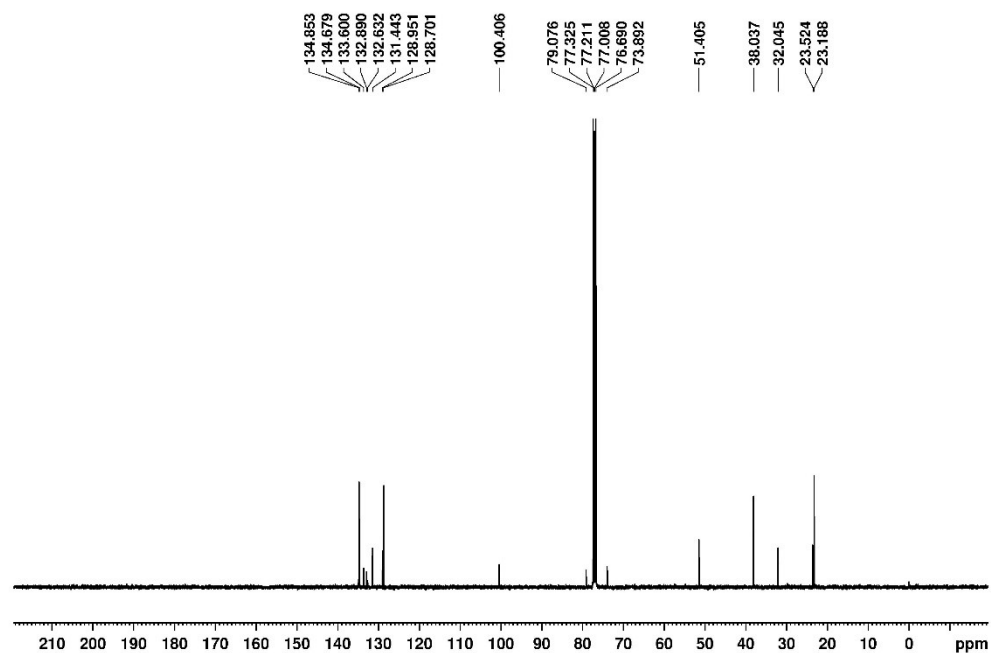

<sup>13</sup>C NMR spectrum of compound **3x**

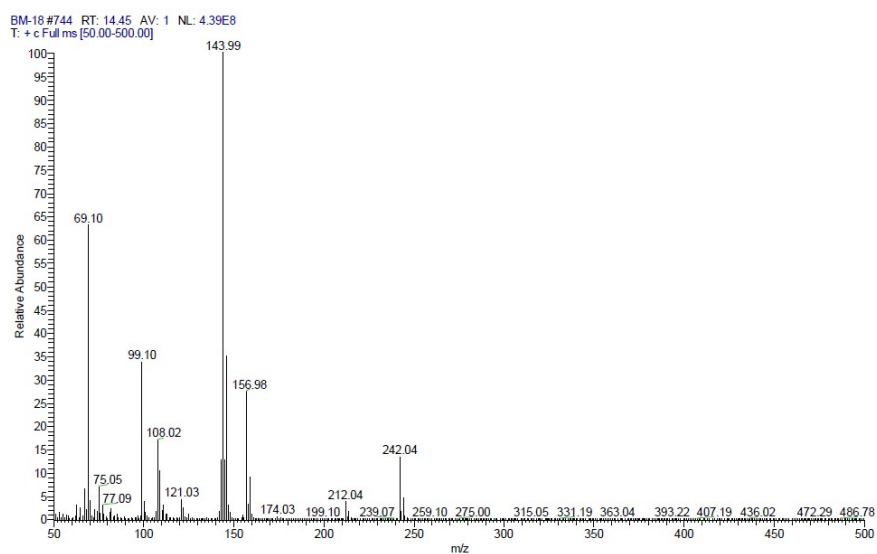

MS spectrum of compound **3x**

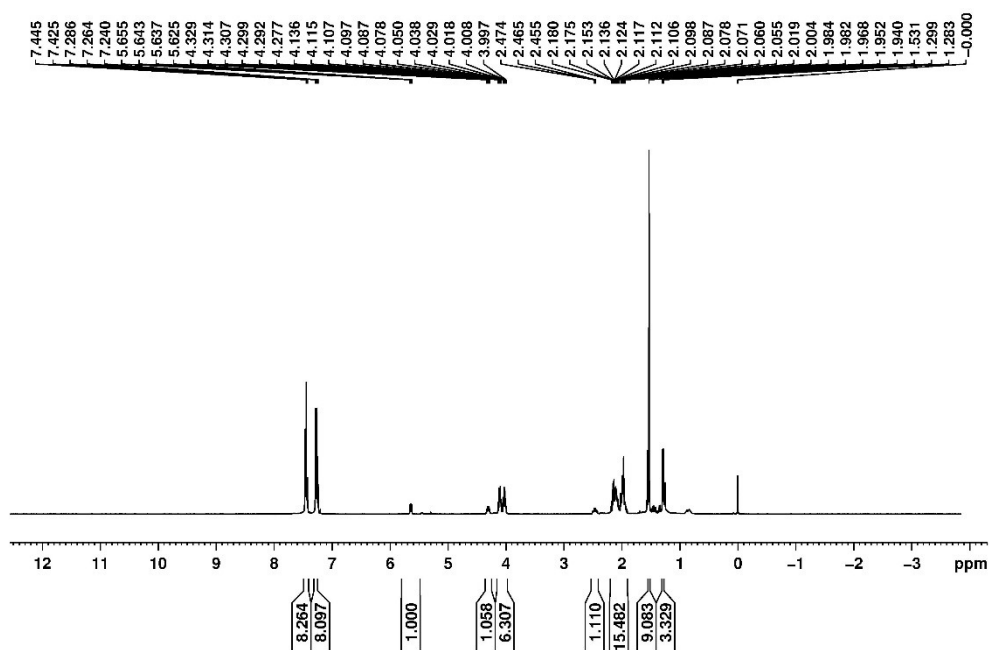

$^1\text{H}$  NMR spectrum of compound **3y**

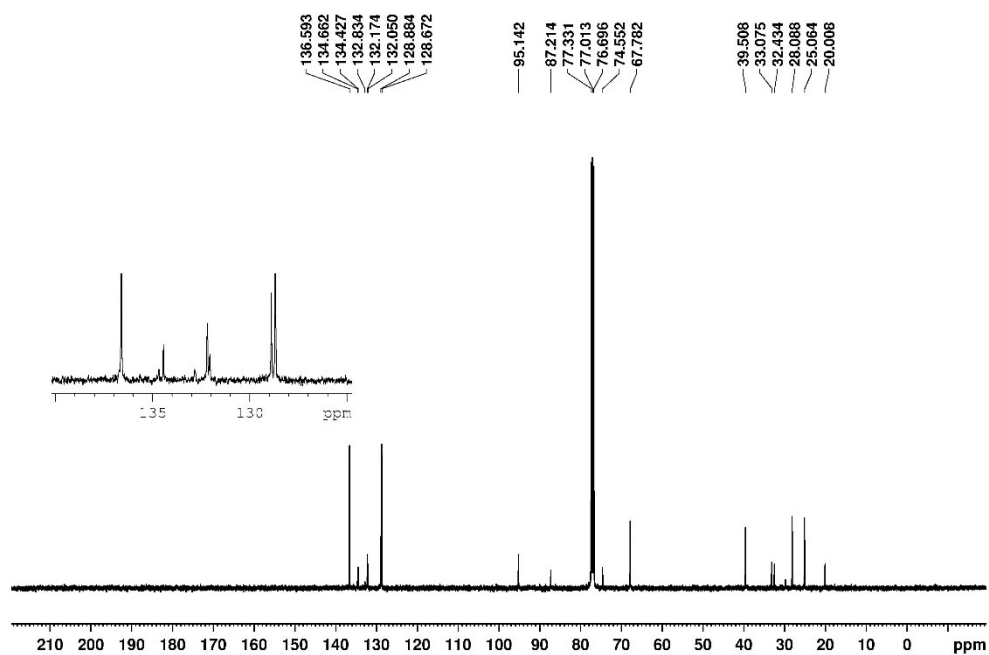

$^{13}\text{C}$  NMR spectrum of compound **3y**

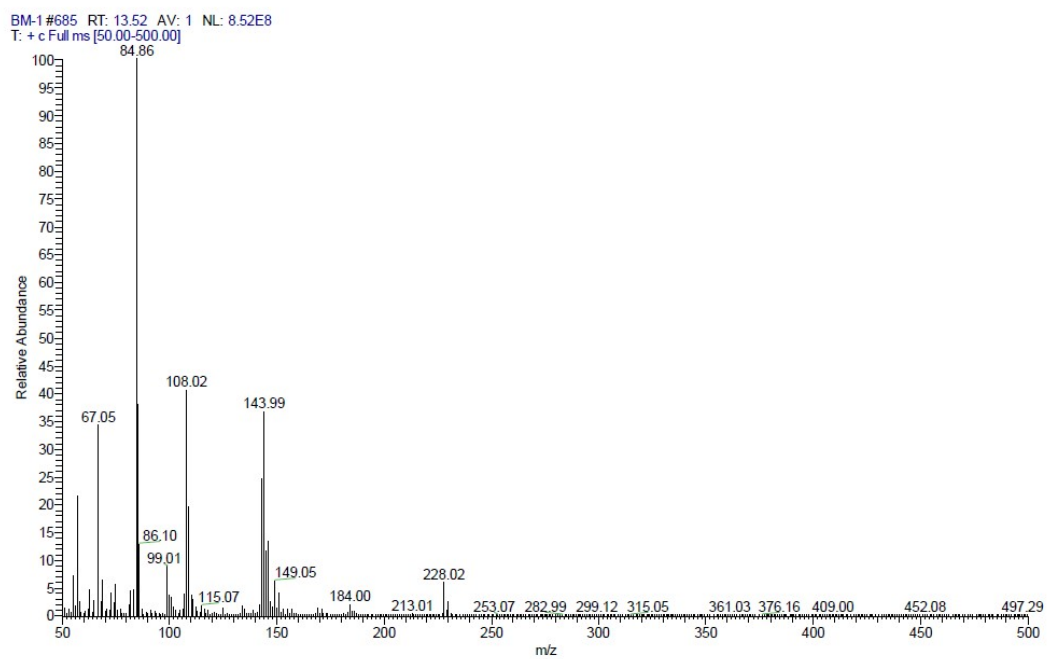

MS spectrum of compound **3y**

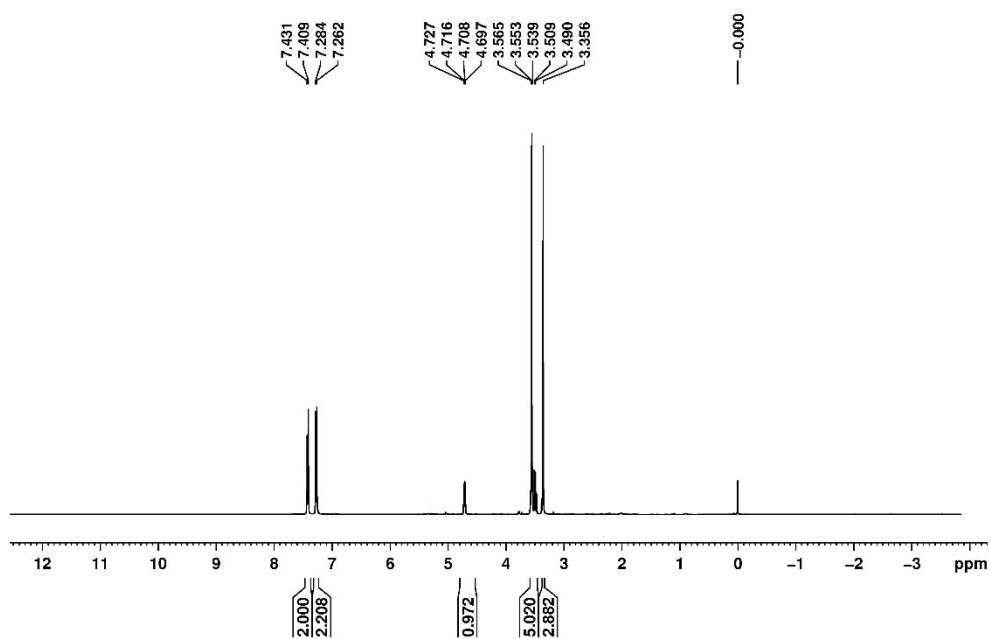

<sup>1</sup>H NMR spectrum of compound **3z-i**

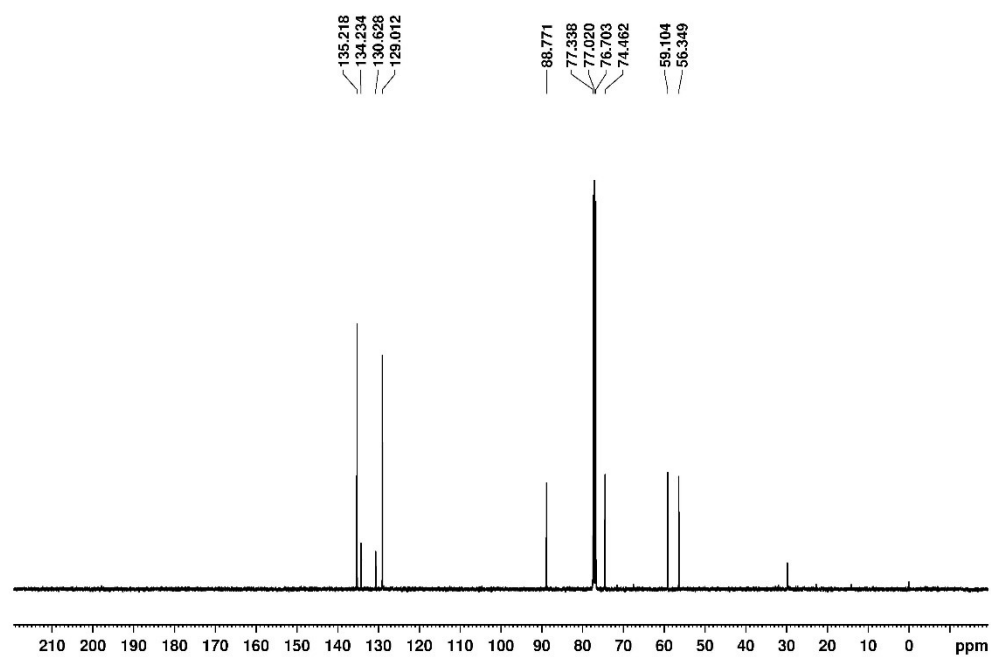

<sup>13</sup>C NMR spectrum of compound **3z-i**

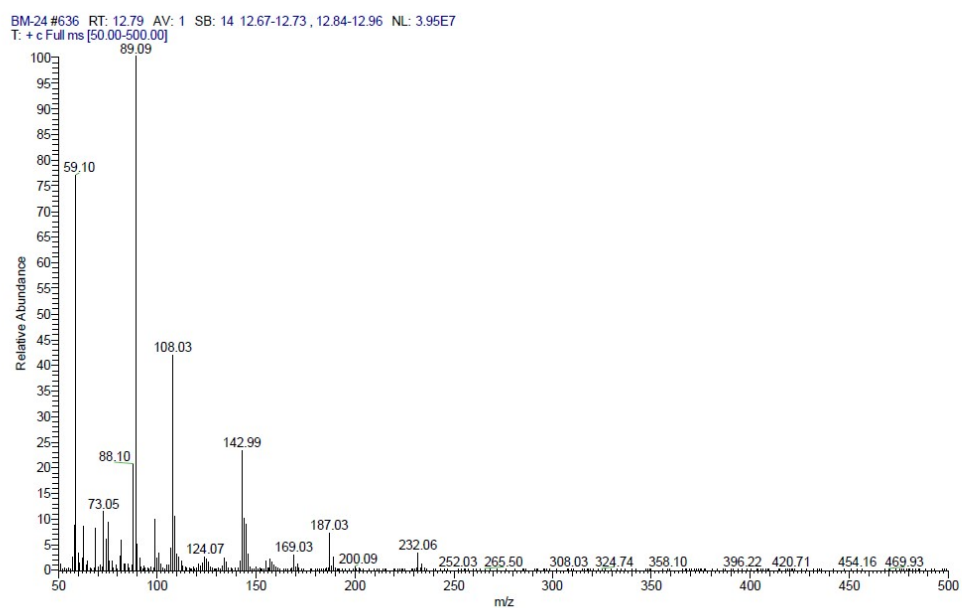

MS spectrum of compound **3z-i**

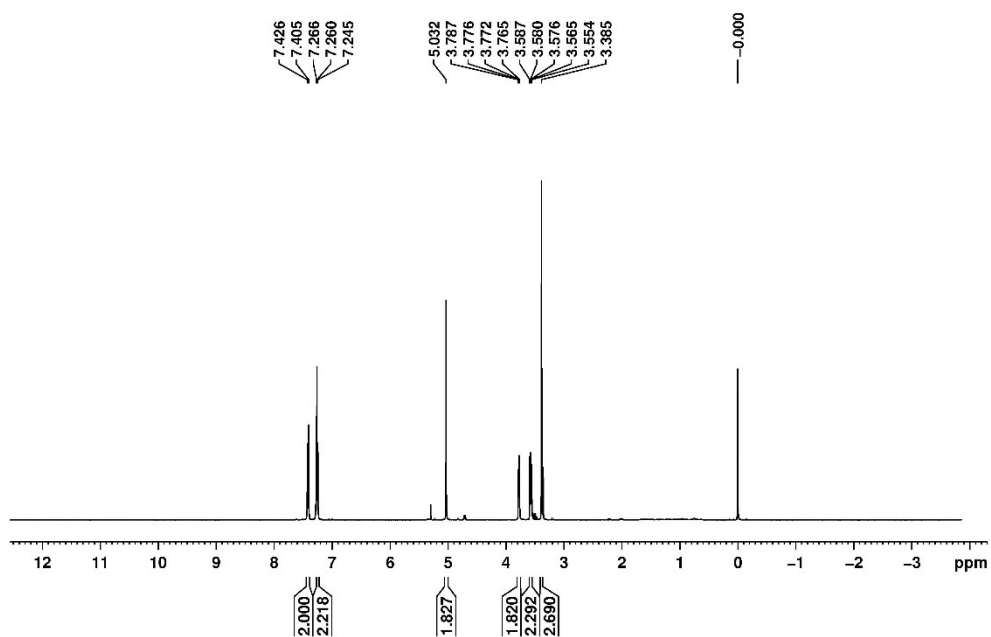

<sup>1</sup>H NMR spectrum of compound **3z-ii**

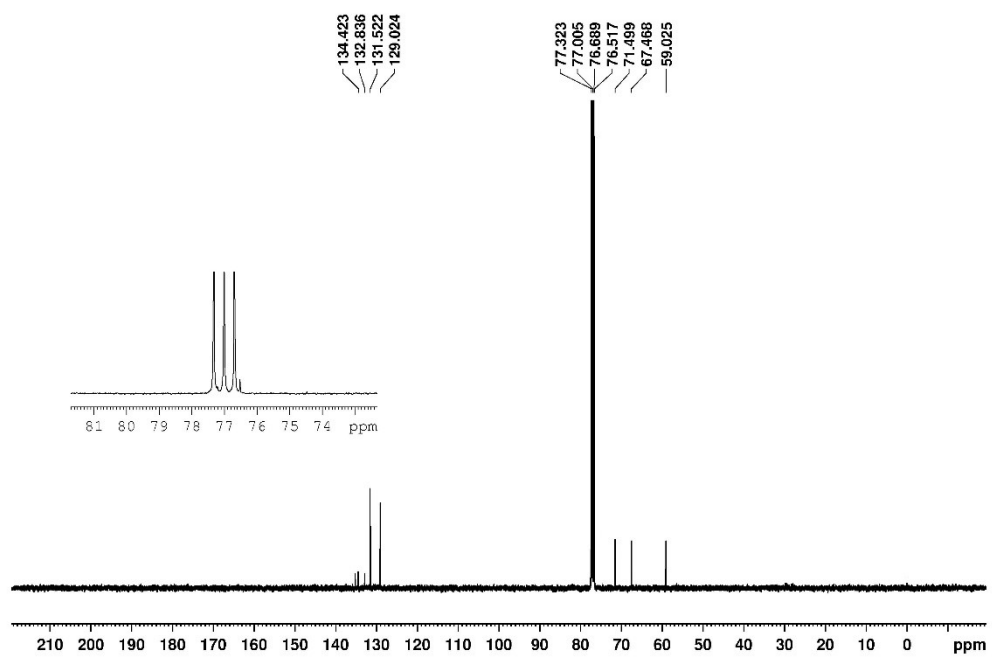

<sup>13</sup>C NMR spectrum of compound **3z-ii**

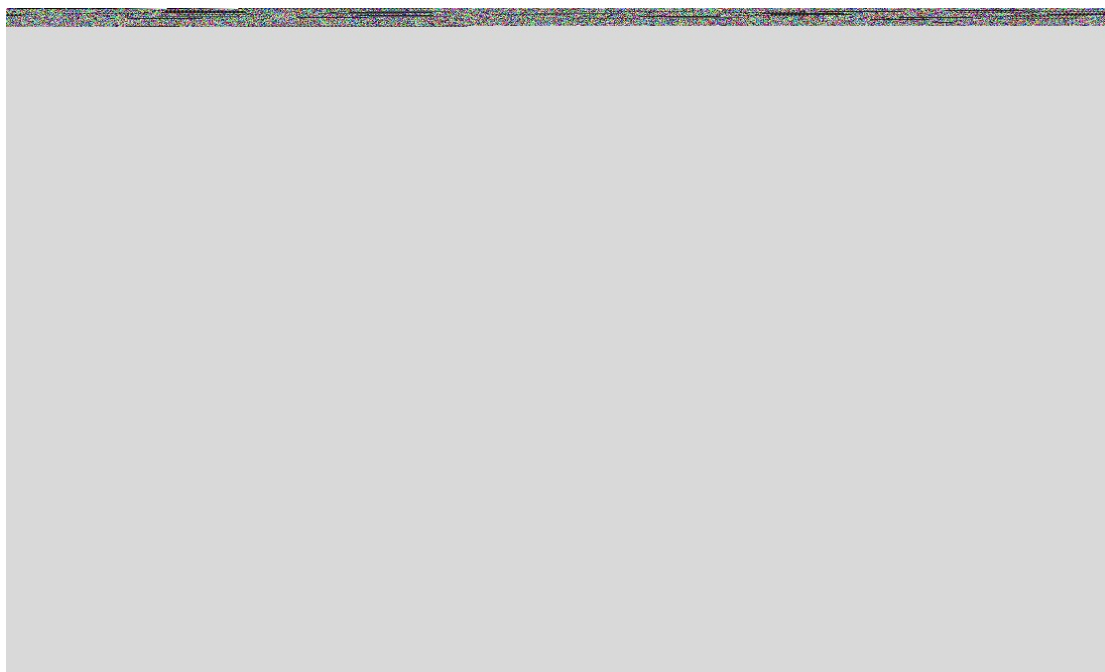

MS spectrum of compound **3z-ii**

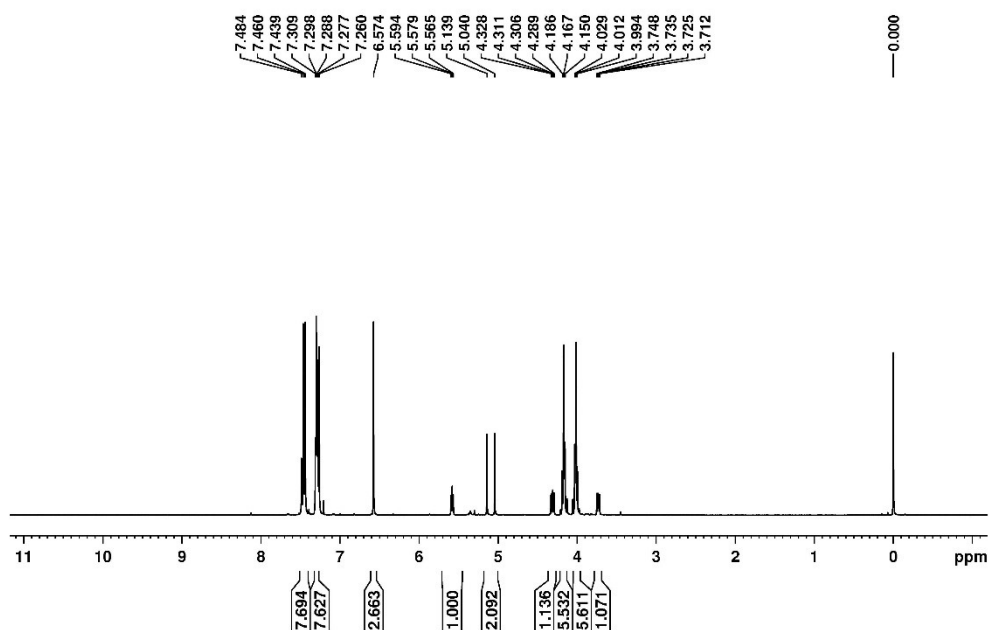

<sup>1</sup>H NMR spectrum of compound **3aa**

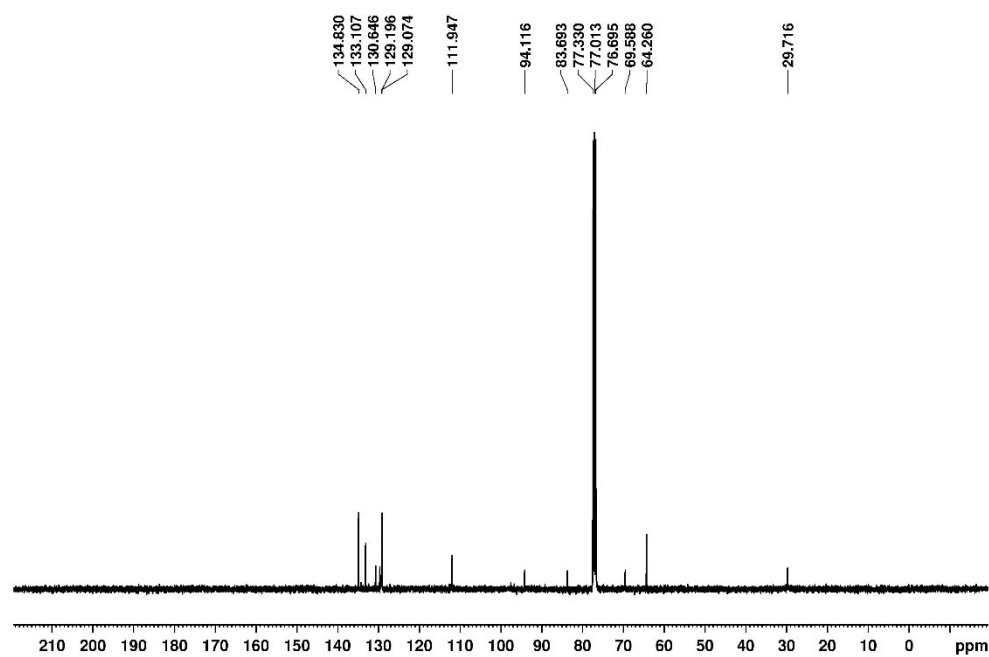

<sup>13</sup>C NMR spectrum of compound **3aa**

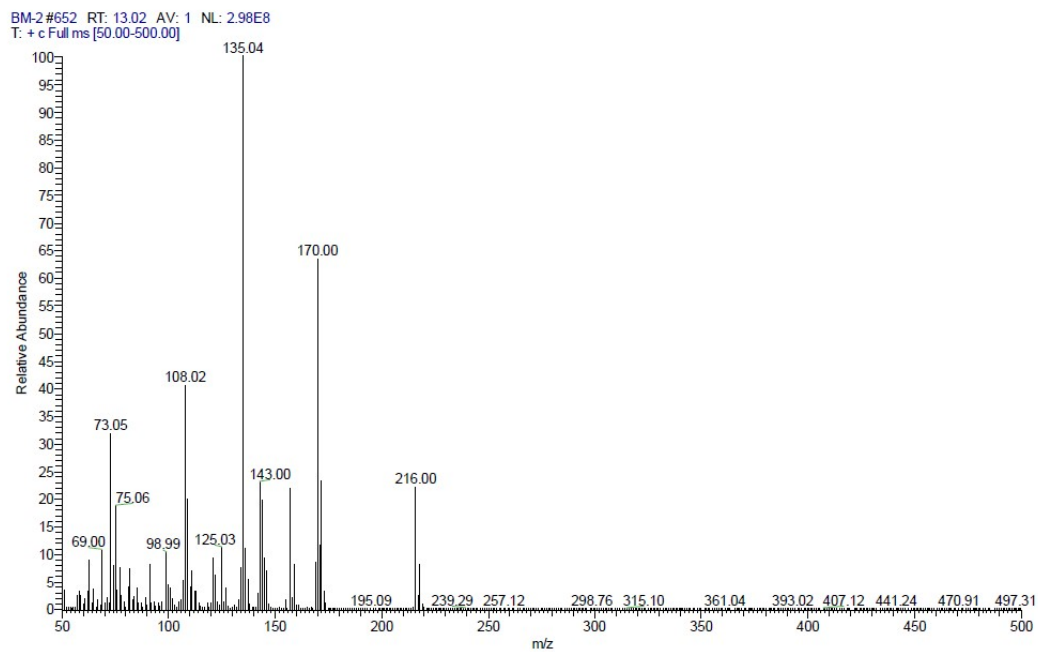

MS spectrum of compound **3aa**

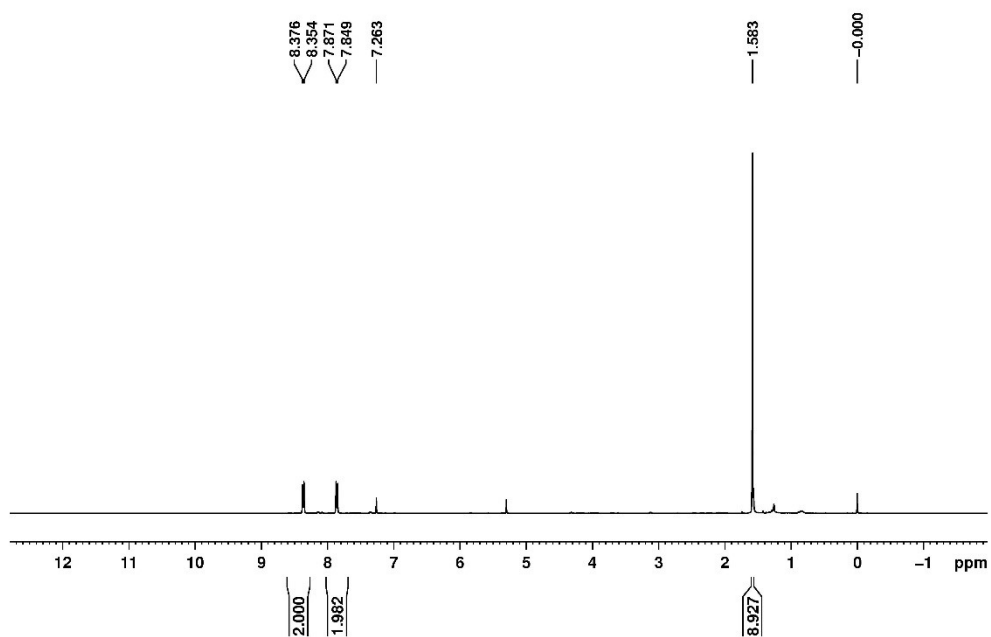

<sup>1</sup>H NMR spectrum of compound **4a**

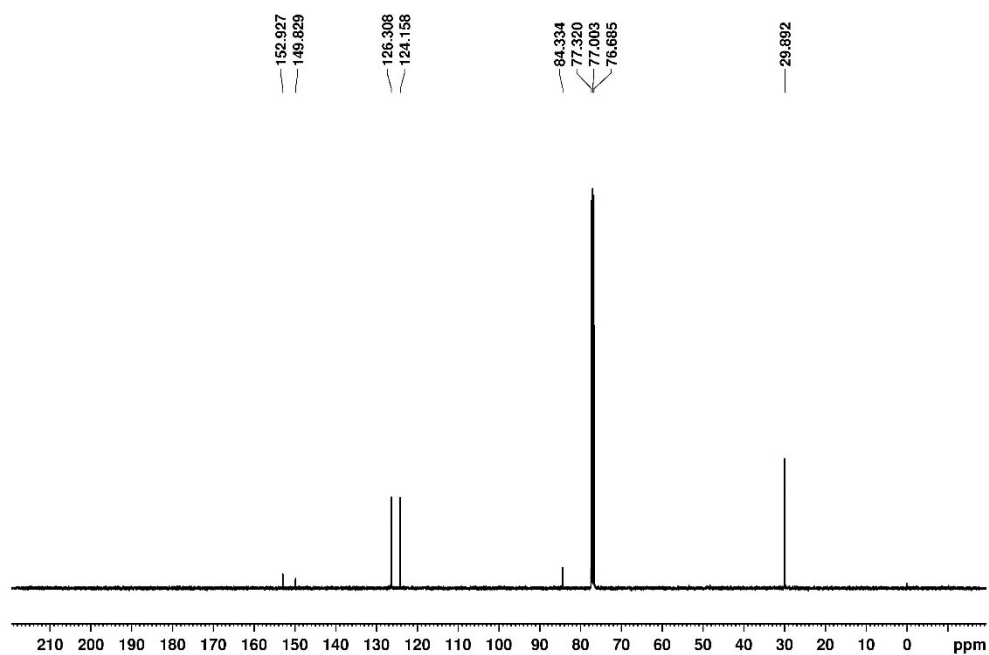

$^{13}\text{C}$  NMR spectrum of compound **4a**

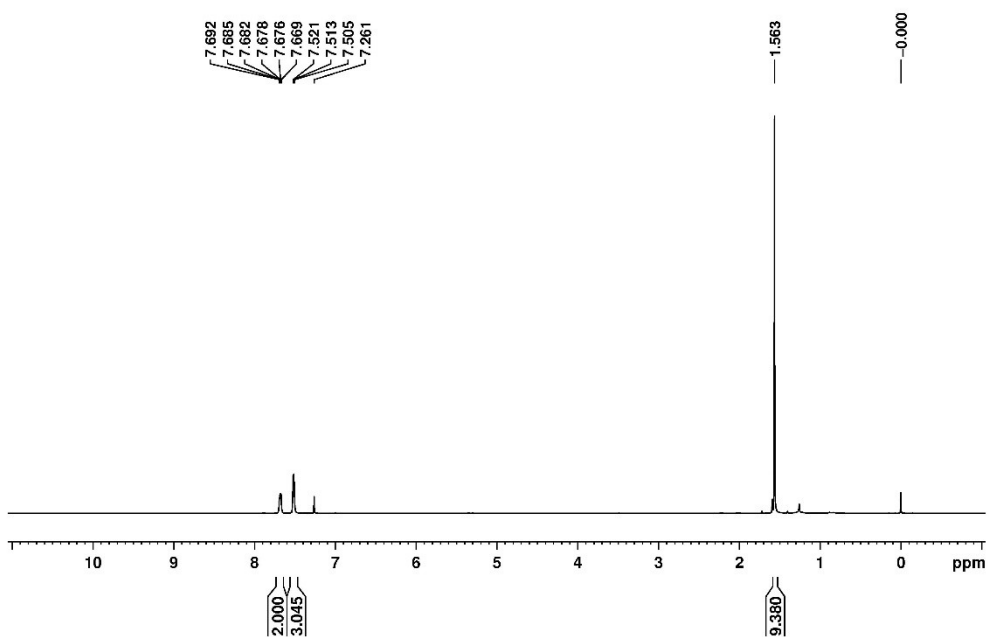

$^1\text{H}$  NMR spectrum of compound **4b**

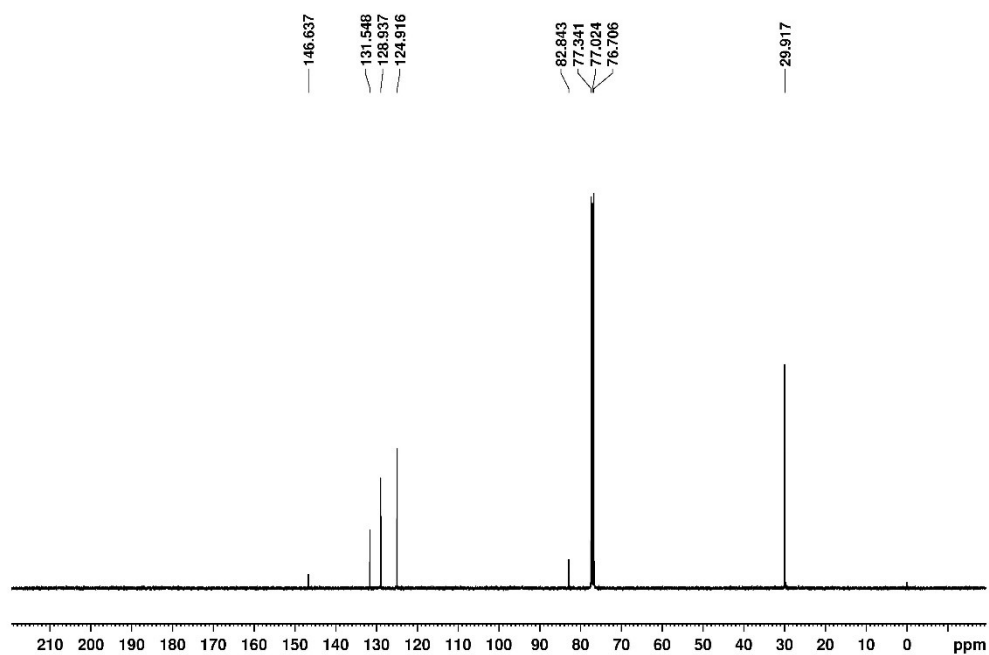

$^{13}\text{C}$  NMR spectrum of compound **4b**

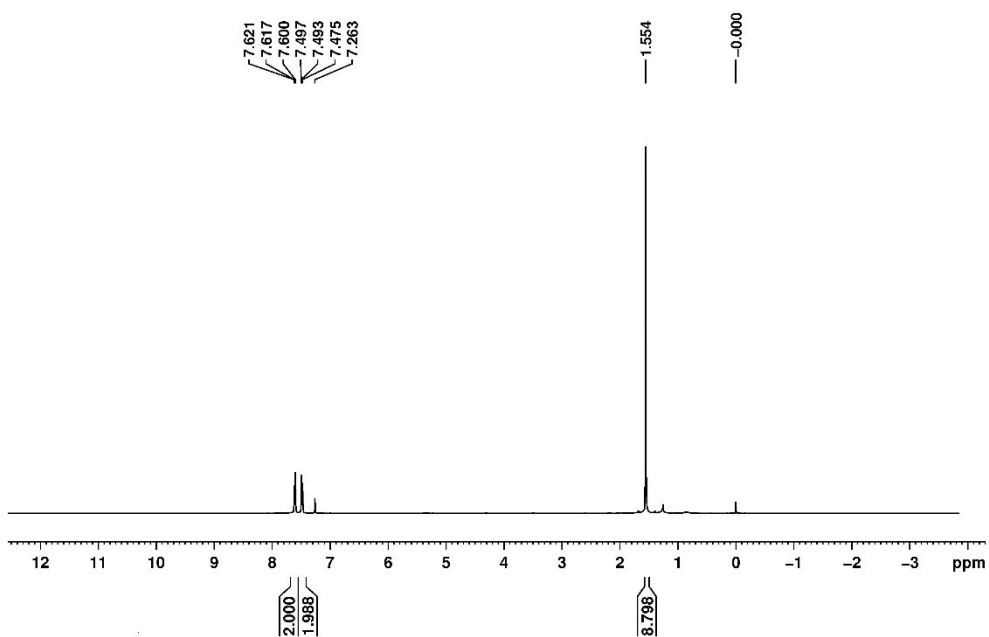

$^1\text{H}$  NMR spectrum of compound **4c**

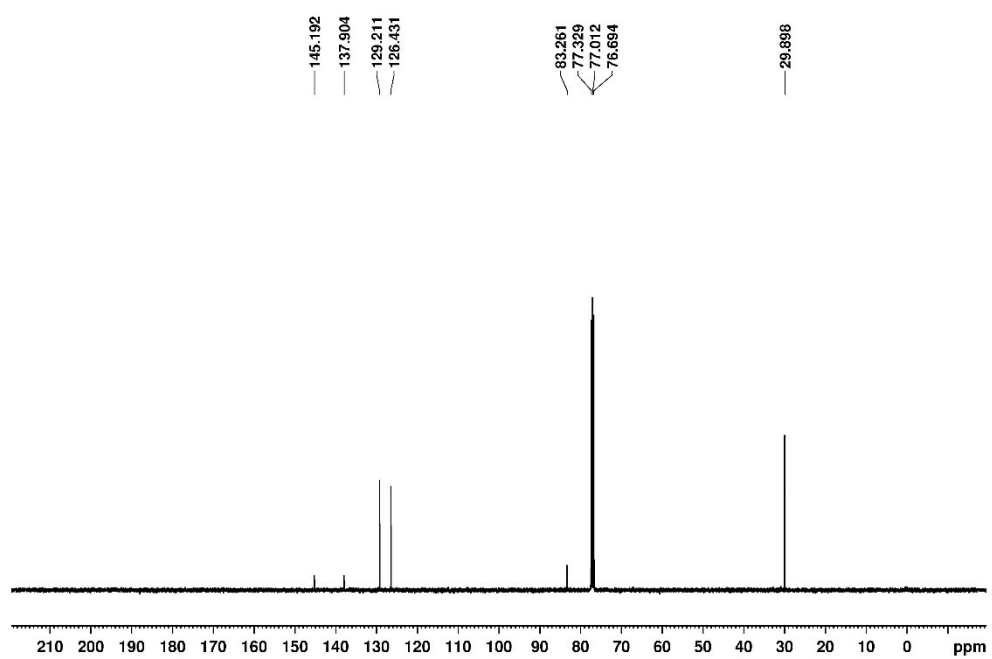

$^{13}\text{C}$  NMR spectrum of compound **4c**
